# Supplementary material for: De novo acyl carrier proteins display structure-independent modification and sequence novelty
Source: Royal Society of Chemistry journal article supplement (doi:10.1039/d5cb00148j), 2026-04-24
Supplement: d5cb00148j1.pdf [file d5cb00148j1.pdf]

1 **De novo acyl carrier proteins display structure-independent modification**  
2 **and sequence novelty**

3 Michael A. Herrera<sup>1\*</sup>, Grace K. King<sup>2‡</sup>, Zoe Ozols<sup>2‡</sup>, Gioele A. Tiburtini<sup>3‡</sup>, Nicoletta Schiavo<sup>3‡</sup>,  
4 Francesca Spyrakis<sup>3\*</sup>, Louise K. Charkoudian<sup>2\*</sup> and Dominic J. Campopiano<sup>1\*</sup>

5 <sup>1</sup> School of Chemistry, The University of Edinburgh, Edinburgh EH9 3FJ, UK

6 <sup>2</sup> Department of Chemistry, Haverford College, Haverford, Pennsylvania 19041, USA

7 <sup>3</sup>Department of Drug Sciences and Technology, University of Turin, Turin 10125, Italy

8 ‡ These authors contributed equally

9 \* Corresponding author

10

11 **Supplementary Information**

12

13

14

| Heading                          | Contents                                                                                                                                                                                                                                 | Page                                               |
|----------------------------------|------------------------------------------------------------------------------------------------------------------------------------------------------------------------------------------------------------------------------------------|----------------------------------------------------|
| Additional Materials and Methods | Buffers and reagents<br>Plasmids, strains and proteins<br>LC/ESI-MS instrumentation, hardware and parameters.<br>Size-exclusion chromatography following <i>holo</i> →C12-acyl conversion.                                               | 2-3                                                |
| Supplementary Tables             | S1-S20                                                                                                                                                                                                                                   | 4-20                                               |
| Supplementary Figures            | Sequence analysis (Fig. S1-3)<br>Purification data (Fig. S4-14)<br>LC/ESI-MS (Fig. S15-37)<br>Structural modelling and MDS (Fig. S38-S47)<br>Additional CD data (Fig. S48)<br>Additional sequence data (Fig. S49)<br>Raw SDS-PAGE images | 21-22<br>23-29<br>30-41<br>32-48<br>49<br>50<br>51 |
| Plasmid Maps                     | pALGO and pCHALGO maps                                                                                                                                                                                                                   | 53-64                                              |

15

## 16 **Additional Materials and Methods**

17 **Buffers and reagents.** A summary of all reagent stocks and rich media can be found in Table S1.  
18 CoASH, lauric acid, chloramphenicol and kanamycin sulfate were purchased from Sigma-Aldrich.  
19 Imidazole, DTT and IPTG were purchased from Fluorochem. Yeast extract and tryptone were  
20 purchased from Merck Life Sciences, and SOC recovery medium (for transformations) was purchased  
21 from New England Biolabs. VLB-Millar broth, VLB-agar and Autoinduction media was purchased from  
22 Formedium. All other chemicals and solvents were purchased from Fisher Scientific. Deionised water  
23 (dH<sub>2</sub>O) for buffers, media and reagent stocks was obtained using a Sartorius purifier. All media was  
24 sterilised by autoclave prior to use. All buffers (see table S1) for protein purification were filtered (0.22  
25 µm) and de-gassed under vacuum. For antibiotic selection, the working concentrations of carbenicillin,  
26 kanamycin and chloramphenicol were 100, 50 and 30 µg mL<sup>-1</sup>, respectively.

27

28 **Plasmids, strains and proteins.** A summary of all expression plasmids used in this study can be  
29 found in Table S2. Plasmid pACYC-*sfp* was kindly provided by Ingenza Ltd. Plasmid pSGL-006 was  
30 kindly provided by the Prof. Michael D. Burkart research group. Plasmids pALGO-(013, 027, 040, 044,  
31 055, 057, 059) and pCHALGO-(009, 012, 024, 044, 097) were synthesised and cloned by Genscript.  
32 Plasmids were propagated using NEB 5-alpha (New England Biolabs) cells and purified using  
33 Promega Wizard Plus SV miniprep kit. DNA sequencing was performed by GeneWiz. All purification  
34 hardware (including ÄKTA Start and ÄKTA Go FPLC purifiers) were purchased from Cytiva. SDS-  
35 PAGE was performed using pre-cast NuPAGE 4-12% Bis-Tris gels and NuPAGE MES running buffer  
36 purchased from Invitrogen and used according to manufacturer protocol. Protein gels were stained  
37 using InstantBlue Coomassie stain (Abcam). *VhAasS* and *EcAcpS* were provided as pre-purified  
38 aliquots courtesy of Dr. Gustavo Perez-Ortiz. Protein concentrations were determined using the BCA  
39 assay.

40

41 **LC/ESI-MS instrumentation, hardware and parameters.** This study was a joint expedition between  
42 labs in the University of Edinburgh (UK) and Haverford College (USA). Each lab reproduced the  
43 expression, purification and PTM of *EcAcpP* and ALGO candidates ALGO-055 and ALGO-059, albeit  
44 mass analysis was performed using distinctive LC/ESI-MS setups as described below.

45 *University of Edinburgh:* Proteins were diluted to ~2-5 µM using LC-MS grade water and analysed  
46 using a Waters Synapt G2-Si Quadrupole/Time of Flight (TOF) HDMS coupled to a Waters Acquity  
47 Class I Plus UPLC, equipped with a Phenomenex Aeris C4 column (200 Å, 3.6 µm, 2.1 mm x 50 mm).  
48 Samples were analysed in positive ion mode. LC-MS grade water + 0.1% formic acid was used as  
49 Solvent A. ACN + 0.1% formic acid was used as Solvent B. Analytes were resolved using a fixed flow

50 rate (0.2 ml min<sup>-1</sup>) using the following method parameters: 95% A / 5% B (initial ratio, 1.5 min hold);  
51 5% A / 95% B (3.5 min gradient, 6 min hold), 95% A / 5% B (0.1 min gradient, 0.9 min hold). Mass  
52 spectra were analysed and deconvoluted using MassLynx.

53 *Haverford College*: Proteins were diluted to ~10 µM using LCMS grade water and analysed using an  
54 Agilent Technologies InfinityLab G6125B LC/MS coupled with an Agilent 1260 Infinity II LC system,  
55 equipped with a Waters XBridge Protein BEH C4 reverse phase column (300 Å, 3.55 µm, 2.1 mm x  
56 50 mm) heated to 45 °C. Samples were analysed via electrospray ionization mass spectrometry (ESI-  
57 MS) in positive ion mode. LC-MS grade water + 0.1% formic acid was used as Solvent A. ACN + 0.1%  
58 formic acid was used as Solvent B. Analytes were resolved using a fixed flow rate (0.2 ml min<sup>-1</sup>) using  
59 the following method parameters: 95% A / 5% B (initial ratio, 1 min hold); 5% A / 95% B (3.1 min  
60 gradient, 1.42 min hold), 95% A / 5% B (0.4 min gradient, 4.08 min hold). Mass spectra were  
61 deconvoluted using ESIprot online.

62

63 **Size-exclusion chromatography following *holo*→C<sub>12</sub>-acyl conversion.** All buffers used in FPLC  
64 were filter sterilized (0.2 µm Nylon membrane filter) and degassed by vacuum, except for small  
65 buffer volumes used to wash syringe, needle, and injection port which were not degassed. FPLC  
66 was used to separate ACPs from other enzymes after *in vitro* reactions, in preparation for CD  
67 spectroscopy. FPLC was performed on an Akta Pure chromatography system (GE Healthcare)  
68 equipped with a Superdex 75 Increase 10/300 GL column (GE Healthcare). The column was  
69 equilibrated with 50 mM sodium phosphate buffer (pH 7.6) for ~ 90 minutes. A 500 µL sample  
70 loop was primed with 1 mL of 50 mM sodium phosphate buffer (pH 7.6), before ~500 µL of sample  
71 was injected into the loop. Buffer was run at a flow rate of 0.8 mL/min, with pressure maintained  
72 at 0.3-0.4 MPa, and UV absorbance monitored at 280 nm. Fractions were collected in 0.5 mL  
73 increments. Fractions containing significant UV absorbance (280 nm) were analyzed by LCMS,  
74 and pooled and concentrated by centrifugal filtration for further use. Samples were also confirmed  
75 by SDS-PAGE

76

77 **Supplementary Tables (S1-20)**

78

79 **Table S1** Rich media and reagent stock solutions

| <b>Item</b>                    | <b>Contents</b>                                                                                                                                                                                                                                                                                                                                                                                                                    |
|--------------------------------|------------------------------------------------------------------------------------------------------------------------------------------------------------------------------------------------------------------------------------------------------------------------------------------------------------------------------------------------------------------------------------------------------------------------------------|
| <b>VLB media</b>               | Yeast extract (5 g L <sup>-1</sup> ), tryptone (10 g L <sup>-1</sup> ), NaCl (10 g L <sup>-1</sup> )                                                                                                                                                                                                                                                                                                                               |
| <b>VLB-Agar</b>                | Yeast extract (5 g L <sup>-1</sup> ), tryptone (10 g L <sup>-1</sup> ), NaCl (10 g L <sup>-1</sup> ), Agar (15 g L <sup>-1</sup> )                                                                                                                                                                                                                                                                                                 |
| <b>Autoinduction Media</b>     | Yeast extract (5 g L <sup>-1</sup> ), tryptone (10 g L <sup>-1</sup> ), D-glucose (0.5 g L <sup>-1</sup> ), α-lactose (2 g L <sup>-1</sup> ), (NH <sub>4</sub> ) <sub>2</sub> SO <sub>4</sub> (3.3 g L <sup>-1</sup> ), KH <sub>2</sub> PO <sub>4</sub> (6.8 g L <sup>-1</sup> ), Na <sub>2</sub> HPO <sub>4</sub> (7.1 g L <sup>-1</sup> ), MgSO <sub>4</sub> (0.15 g L <sup>-1</sup> ), trace elements (0.03 g L <sup>-1</sup> ) |
| <b>Kanamycin (1000X)</b>       | Kanamycin sulfate (50 mg mL <sup>-1</sup> ) in dH <sub>2</sub> O                                                                                                                                                                                                                                                                                                                                                                   |
| <b>Carbenicillin (1000X)</b>   | Carbenicillin (100 mg mL <sup>-1</sup> ) in dH <sub>2</sub> O                                                                                                                                                                                                                                                                                                                                                                      |
| <b>Chloramphenicol (1000X)</b> | Chloramphenicol (30 mg mL <sup>-1</sup> ) in EtOH                                                                                                                                                                                                                                                                                                                                                                                  |
| <b>1 M IPTG (1000X)</b>        | IPTG (238 mg mL <sup>-1</sup> ) in dH <sub>2</sub> O                                                                                                                                                                                                                                                                                                                                                                               |
| <b>DTT (100X)</b>              | DTT (15.4 mg mL <sup>-1</sup> ) in dH <sub>2</sub> O                                                                                                                                                                                                                                                                                                                                                                               |
| <b>Lauric acid (1000X)</b>     | Lauric acid (20.0 mg mL <sup>-1</sup> ) in DMSO                                                                                                                                                                                                                                                                                                                                                                                    |
| <b>CoASH (1000X)</b>           | Coenzyme A sodium salt (76.6 mg mL <sup>-1</sup> ) in dH <sub>2</sub> O                                                                                                                                                                                                                                                                                                                                                            |
| <b>ATP</b>                     | Adenosine triphosphate sodium salt (55.1 mg mL <sup>-1</sup> ) in dH <sub>2</sub> O                                                                                                                                                                                                                                                                                                                                                |
| <b>MgCl<sub>2</sub></b>        | Magnesium chloride anhydrous (47.6 mg mL <sup>-1</sup> ) in dH <sub>2</sub> O                                                                                                                                                                                                                                                                                                                                                      |

80

81

82 **Table S2** Plasmids and protein expression summary

| Internal Name | Product                       | Vector     | Resistance | Expression                      |
|---------------|-------------------------------|------------|------------|---------------------------------|
| pACYC-sfp     | <i>BsSfp</i>                  | pACYC-Duet | CampR      | 0.1 mM IPTG, 16 °C, 18 hours    |
| pET16b-aass   | <i>VhAasS</i>                 | pET16b     | AmpR       | 0.5 mM IPTG, 37 °C, 4.5 hours   |
| pSGL-005      | <i>EcAcpP</i> (C-term Histag) | pET23a     | AmpR       | Auto-induction, 30 °C, 18 hours |
| pALGO-013     | ALGO-013 (C-term Histag)      | pET28a     | KanR       | 1 mM IPTG, 18 °C, 18 hours      |
| pALGO-023     | ALGO-013 (C-term Histag)      | pET28a     | KanR       | 1 mM IPTG, 18 °C, 18 hours      |
| pALGO-040     | ALGO-040 (C-term Histag)      | pET28a     | KanR       | 1 mM IPTG, 18 °C, 18 hours      |
| pALGO-044     | ALGO-044 (C-term Histag)      | pET28a     | KanR       | 1 mM IPTG, 18 °C, 18 hours      |
| pALGO-055     | ALGO-055 (C-term Histag)      | pET28a     | KanR       | 1 mM IPTG, 18 °C, 18 hours      |
| pALGO-057     | ALGO-057 (C-term Histag)      | pET28a     | KanR       | 1 mM IPTG, 18 °C, 18 hours      |
| pALGO-059     | ALGO-059 (C-term Histag)      | pET28a     | KanR       | 1 mM IPTG, 18 °C, 18 hours      |
| pCHALGO-012   | chALGO-012 (C-term Histag)    | pET28a     | KanR       | 1 mM IPTG, 18 °C, 18 hours      |
| pCHALGO-012   | chALGO-024 (C-term Histag)    | pET28a     | KanR       | 1 mM IPTG, 18 °C                |

83

84

85 **Table S3** Seed AcpP sequences used for homologue retrieval.

| Organism                         | Sequence                                                                                |
|----------------------------------|-----------------------------------------------------------------------------------------|
| <i>Escherichia coli</i>          | MSTIEERVKKIIEQLGVKQEEVTNNASFVEDLGADSLDTVELVMALEEEFDTEIPDEEAEKITTQ<br>AAIDYINGHQA        |
| <i>Pseudomonas putida</i>        | MSTIEERVKKIVAEQLGVKQEEVTPEKSFVDDLADSLDTVELVMALEEEFETEIPDEEAEKITTQ<br>AAIDYVNSHKA        |
| <i>Bacteroides fragilis</i>      | MSEIASRVKAIIVDKLGVVEEVEVTETASFTNDLGADSLDTVELIMEFEKEFGISIPDDQAEKIGTVQD<br>AIAYIEEHAK     |
| <i>Sphingomonas paucimobilis</i> | MSETADRVKIVVEHLGVVEADKVTEDASFIDDLGADSLDVELVMAFEEFVGVEIPDDAAEKITTVK<br>DAITYIDENKA       |
| <i>Salmonella enterica</i>       | MSTIEERVKKIIEQLGVKQEEVTNNASFVEDLGADSLDTVELVMALEEEFDTEIPDEEAEKITTQ<br>AAIDYINSHQA        |
| <i>Chlamydia trachomatis</i>     | MSLEDDVKAIIVDQLGVSPEDVKVDSSFIEDLNADSLDL TELIMTLEEKFAFEISEDDAEQLRTVGD<br>VIKYIQEHQN      |
| <i>Helicobacter pylori</i>       | MSLFEDIQAVIAEQLNVDAQVTPAEFVKDLGADSLDVVELIMALEEKFGIEIPDEQAEKIVNVGD<br>VVKYIEDNKLA        |
| <i>Legionella pneumophila</i>    | MSTVEERVVKIVVEQLGVKQEEELKNDASFVDDLADSLDTVELVMALEEEFETEIPDEKAEKITTI<br>QEAIIDYIESNLNKEEA |
| <i>Vibrio cholerae</i>           | MSNIEERVKKIIVEQLGVDEAEVKNESFVEDLGADSLDTVELVMALEEEFDTEIPDEEAEKITTQ<br>AAIDYVTSNAQ        |
| <i>Neisseria meningitidis</i>    | MSNIEQQVKKIVAEQLGVNEADVKNESFQDDLADSLDTVELVMALEEFVGFCEIPDEDAEKITT<br>VQLAIDYINTHNG       |
| <i>Acinetobacter baumannii</i>   | MSTIEERVKKIVAEQLGVKQEEVTNSASFVEDLGADSLDTVELVMALEEEFETEIPDEKAEKITTQ<br>EAIIDYIVAHQQ      |
| <i>Campylobacter jejuni</i>      | MATFDDVKAVVVEQLGIDADAVKMEKIIEDLGADSLDVVELIMALEEKFEVEIPDSDAEKLIKIEDV<br>VNYIDNLKK        |
| <i>Porphyromonas gingivalis</i>  | MSEVEKKVIDLVVDKLNVEASEVTREASFSNDLGADSLDTVELMMNFEKEFNMSIPDDQAQEIKT<br>VGDAIDYIEKNLK      |
| <i>Caulobacter vibrioides</i>    | MSDILERVVKIVIEHLDADPEKVTEKASFIDDLADSLDNVELVMAFEEFVDFIEIPDDAAEHQITVG<br>DAVKFITEKTA      |
| <i>Bordetella parapertussis</i>  | MESIEQRVKKIVAEQLGVNEAEIKNESSFLDDLADSLDMVELVMALEDEFETEIPDEEAEKITTQ<br>QQAVDYINSHGKQ      |
| <i>Burkholderia cepacia</i>      | MDNIEQRVKKIVAEQLGVAEAEIKTEASFVNDLGADSLDTVELVMALEDEFVGMIEIPDEEAEKITTQ<br>QQAIDYARANVKA   |
| <i>Yersinia pestis</i>           | MSTIEERVKKIIVEQLGVKEDEVKNSASFVEDLGADSLDTVELVMALEEEFDTEIPDEEAEKITTQ<br>AAIDFINANQQ       |

86

87

88 **Table S4** Descriptive statistics of sampled ALGO sequences (pI).

| Factor   | N   | Mean  | StDev | 95% CI         |
|----------|-----|-------|-------|----------------|
| r = 0.00 | 100 | 4.386 | 0.089 | (4.369, 4.404) |
| r = 0.60 | 100 | 4.320 | 0.106 | (4.299, 4.341) |
| r = 1.00 | 100 | 4.240 | 0.174 | (4.205, 4.274) |

89

90 **Table S5** Descriptive statistics of sampled ALGO sequences (GRAVY).

| Factor   | N   | Mean   | StDev | 95% CI           |
|----------|-----|--------|-------|------------------|
| r = 0.00 | 100 | -0.201 | 0.137 | (-0.228, -0.173) |
| r = 0.60 | 100 | -0.105 | 0.181 | (-0.141, -0.069) |
| r = 1.00 | 100 | -0.029 | 0.185 | (-0.066, 0.007)  |

91

92 **Table S6** Descriptive statistics of sampled ALGO sequences (pLDDT).

| Factor   | N   | Mean   | StDev | 95% CI           |
|----------|-----|--------|-------|------------------|
| r = 0.00 | 100 | 93.356 | 0.932 | (93.170, 93.540) |
| r = 0.60 | 100 | 90.086 | 2.746 | (89.541, 90.631) |
| r = 1.00 | 100 | 86.823 | 4.216 | (85.986, 87.660) |

93

94

95 **Table S7** Welch's ANOVA (pI).

| Source      | DF Num | DF Den  | F-Value | P-Value  |
|-------------|--------|---------|---------|----------|
| Factor (pI) | 2      | 187.826 | 31.773  | 1.30E-12 |

96

97 **Table S8** Welch's ANOVA (GRAVY).

| Source         | DF Num | DF Den  | F-Value | P-Value  |
|----------------|--------|---------|---------|----------|
| Factor (GRAVY) | 2      | 193.849 | 28.882  | 1.05E-11 |

98

99 **Table S9** Welch's ANOVA (pLDDT).

| Source         | DF Num | DF Den  | F-Value | P-Value     |
|----------------|--------|---------|---------|-------------|
| Factor (pLDDT) | 2      | 150.882 | 166.258 | <1.000 E-16 |

100

101 **Table S10** Games-Howell simultaneous tests for differences of means (pI)

| Difference of Levels | Difference of means | SE of Difference | 95% CI           | T-Value | Adjusted P-Value |
|----------------------|---------------------|------------------|------------------|---------|------------------|
| r = 0.60 – r = 0.00  | -0.066              | 0.014            | (-0.099, -0.034) | -4.790  | 1.963E-05        |
| r = 1.00 – r = 0.00  | -0.146              | 0.020            | (-0.193, -0.100) | -7.508  | 9.951E-06        |
| r = 1.00 - r = 0.60  | -0.080              | 0.020            | (-0.129, -0.032) | -3.951  | 3.485E-04        |

102

103

104

105 **Table S11** Games-Howell simultaneous tests for differences of means (GRAVY).

| Difference of Levels  | Difference of means | SE of Difference | 95% CI         | T-Value | Adjusted P-Value |
|-----------------------|---------------------|------------------|----------------|---------|------------------|
| $r = 0.60 - r = 0.00$ | 0.095               | 0.023            | (0.042, 0.149) | 4.191   | 1.362E-04        |
| $r = 1.00 - r = 0.00$ | 0.171               | 0.023            | (0.117, 0.226) | 7.437   | 9.951E-06        |
| $r = 1.00 - r = 0.60$ | 0.076               | 0.026            | (0.015, 0.137) | 2.933   | 1.045E-02        |

106

107 **Table S12** Games-Howell simultaneous tests for differences of means (pLDDT).

| Difference of Levels  | Difference of means | SE of Difference | 95% CI           | T-Value | Adjusted P-Value |
|-----------------------|---------------------|------------------|------------------|---------|------------------|
| $r = 0.60 - r = 0.00$ | -3.269              | 0.290            | (-3.958, -2.581) | -11.28  | 9.951E-06        |
| $r = 1.00 - r = 0.00$ | -6.533              | 0.432            | (-7.558, -5.507) | -15.13  | 9.951E-06        |
| $r = 1.00 - r = 0.60$ | -3.263              | 0.503            | (-4.452, -2.075) | -6.49   | 9.953E-06        |

108

109

110 **Table S13** ALGO sequences sampled for experimental testing.

| Protein                | Sequence                                                                               | %ID (vs <i>EcAcpP</i> ) | GRAVY  | pI   | pLDDT |
|------------------------|----------------------------------------------------------------------------------------|-------------------------|--------|------|-------|
| ALGO-013               | MSTLPDKVKKIVADQLGVKEPKVKNHASFIQDLGA<br>DSLDTVELVMSMEEDFDVEIPDDTAEKISSVAQAID<br>YVTDHSA | 64.10                   | -0.25  | 4.41 | 93.96 |
| ALGO-023               | MMSTNDKVEKIVLNELGVGETEVQLDAIFVDDLGA<br>DSLDSVELIMTLENSFDIQIPDDHAETITTVQFAVSY<br>ATAKSK | 51.28                   | 0.03   | 4.30 | 94.02 |
| ALGO-040               | MNDVSRVQRVLGEQLGVETEVVTSAAFVEDLG<br>ADSLDTVELVMSLEEFNPNIPDEHAEDITQVQSAV<br>HYINEQSA    | 61.54                   | -0.08  | 4.20 | 94.72 |
| ALGO-044               | MSEIKKVKKIVVQELGVQNEVHESAFVQDLGA<br>DSLDFVELIMSFEEQFHTAIPDEDAEKIITVAQAIHYI<br>NNNSG    | 57.69                   | -0.01  | 4.54 | 94.26 |
| ALGO-055               | MNPLEQRVKTIIVQELGVNEDVVINDASFVRDLGA<br>DSLDSVELVMALEKEFSIQIPDEQAEEKIIVSAAIDY<br>AEKAAK | 61.54                   | 0.00   | 4.46 | 93.52 |
| ALGO-057               | MNELFRKVVQAIWVENLGVGVKVTNESAFANDLGA<br>SLDQVELLMAIEEQFDCCIPDEEAEDITVADAILY<br>GASSQ    | 53.85                   | 0.13   | 4.33 | 93.91 |
| ALGO-059               | MSNLDQRVIDIIVQELGVPPKEVKSEASFIKDLGAD<br>SLDTVELIMSIEEDFNVEIPDEDAEHITTVASVLNYL<br>NEHSN | 56.41                   | -0.15  | 4.27 | 93.74 |
| <sup>ch</sup> ALGO-009 | MNPLDQRVITIIVQELGVPPKEVKSDASFVKDLGAD<br>SLDTVELIMSIEKEFSVQIPDEDAEHITTVASVLDYA<br>NKHAN | 57.69                   | -0.10  | 4.18 | 92.71 |
| <sup>ch</sup> ALGO-012 | MSNLDQRVIDIIVQELGVNPDVVKSEASFIKDLGAD<br>SLDTVELIMSIEKDFSIQIPDEDAEHIIQVSAALNYAE<br>EHAN | 51.28                   | -0.03  | 3.84 | 94.48 |
| <sup>ch</sup> ALGO-024 | MSPLDQRVIDIIVQELGVNPDVVKSEASFIKDLGAD<br>SLDTVELIMALEKDFSIQIPDEDAEKIITVAVIDYLN<br>EHAN  | 58.97                   | 0.14   | 3.82 | 94.27 |
| <sup>ch</sup> ALGO-044 | MNNLEQRVKDIIVQELGVNEDEVISDASFIKDLGAD<br>SLDTVELIMALEEDFNVEIPDEDAEKITTVAAAINYA<br>EKHSN | 64.10                   | -0.235 | 3.78 | 93.56 |
| <sup>ch</sup> ALGO-097 | MSNLEQRVKTIIVQELGVPEKVVINDASFVKDLGAD<br>SLDTVELIMSLEKEFNIEIPDEDAEHITTVASVINYAN<br>KASK | 60.26                   | 0.013  | 4.26 | 91.85 |

111

112

113 **Table S14** LC/ESI-MS (*EcAcpP* and ALGO sequences).

| Protein                                  | Empirical Formula                                                                    | Theoretical MW / Da | Actual MW / Da                   | Comment                          |
|------------------------------------------|--------------------------------------------------------------------------------------|---------------------|----------------------------------|----------------------------------|
| <i>apo-EcAcpP</i>                        | C <sub>420</sub> H <sub>658</sub> N <sub>114</sub> O <sub>146</sub> S <sub>2</sub>   | 9704.50             | 9573.39 ± 0.09                   | -Met <sub>1</sub>                |
| <i>holo-EcAcpP</i>                       | C <sub>431</sub> H <sub>679</sub> N <sub>116</sub> O <sub>152</sub> S <sub>3</sub> P | 10044.83            | 9913.78 ± 0.04                   | -Met <sub>1</sub>                |
| C <sub>12</sub> - <i>EcAcpP</i>          | C <sub>443</sub> H <sub>702</sub> N <sub>116</sub> O <sub>153</sub> S <sub>3</sub> P | 10228.14            | 10096.08 ± 0.14                  | -Met <sub>1</sub>                |
| <i>apo</i> -ALGO-013                     | C <sub>418</sub> H <sub>657</sub> N <sub>113</sub> O <sub>139</sub> S <sub>3</sub>   | 9585.53             | 9454.33 ± 0.02                   | -Met <sub>1</sub>                |
| <i>apo</i> -ALGO-040                     | C <sub>417</sub> H <sub>642</sub> N <sub>118</sub> O <sub>142</sub> S <sub>2</sub>   | 9644.37             | 9512.88 ± 0.25<br>9644.40 ± 0.18 | Partial loss of Met <sub>1</sub> |
| <i>apo</i> -ALGO-055                     | C <sub>425</sub> H <sub>679</sub> N <sub>117</sub> O <sub>136</sub> S <sub>2</sub>   | 9667.74             | 9667.43 ± 0.00                   |                                  |
| <i>holo</i> -ALGO-055                    | C <sub>436</sub> H <sub>700</sub> N <sub>119</sub> O <sub>142</sub> S <sub>3</sub> P | 10008.08            | 10007.91 ± 0.12                  |                                  |
| C <sub>12</sub> -ALGO-055                | C <sub>448</sub> H <sub>722</sub> N <sub>119</sub> O <sub>143</sub> S <sub>3</sub> P | 10190.38            | 10190.28 ± 0.00                  |                                  |
| <i>apo</i> -ALGO-059                     | C <sub>426</sub> H <sub>665</sub> N <sub>115</sub> O <sub>143</sub> S <sub>2</sub>   | 9749.63             | 9618.46 ± 0.12                   | -Met <sub>1</sub>                |
| <i>holo</i> -ALGO-059                    | C <sub>437</sub> H <sub>686</sub> N <sub>117</sub> O <sub>149</sub> S <sub>3</sub> P | 10089.96            | 9958.44 ± 0.13                   | -Met <sub>1</sub>                |
| C <sub>12</sub> -ALGO-059                | C <sub>449</sub> H <sub>708</sub> N <sub>117</sub> O <sub>150</sub> S <sub>3</sub> P | 10272.26            | 10140.79 ± 0.12                  | -Met <sub>1</sub>                |
| <i>apo</i> - <sup>ch</sup> ALGO-012      | C <sub>423</sub> H <sub>662</sub> N <sub>116</sub> O <sub>140</sub> S <sub>2</sub>   | 9676.64             | 9545.40 ± 0.02                   | -Met <sub>1</sub>                |
| <i>holo</i> - <sup>ch</sup> ALGO-012     | C <sub>434</sub> H <sub>683</sub> N <sub>118</sub> O <sub>146</sub> S <sub>3</sub> P | 10016.91            | 9885.66 ± 0.01                   | -Met <sub>1</sub>                |
| C <sub>12</sub> - <sup>ch</sup> ALGO-012 | C <sub>446</sub> H <sub>704</sub> N <sub>118</sub> O <sub>147</sub> S <sub>3</sub> P | 10198.21            | 10067.91 ± 0.02                  | -Met <sub>1</sub>                |
| <i>apo</i> - <sup>ch</sup> ALGO-024      | C <sub>427</sub> H <sub>675</sub> N <sub>113</sub> O <sub>137</sub> S <sub>2</sub>   | 9647.76             | 9647.70 ± 0.02                   |                                  |
| <i>holo</i> - <sup>ch</sup> ALGO-024     | C <sub>438</sub> H <sub>696</sub> N <sub>115</sub> O <sub>143</sub> S <sub>3</sub> P | 9988.04             | 9987.96 ± 0.02                   |                                  |
| C <sub>12</sub> - <sup>ch</sup> ALGO-024 | C <sub>450</sub> H <sub>718</sub> N <sub>115</sub> O <sub>144</sub> S <sub>3</sub> P | 10170.34            | 10170.16 ± 0.04                  |                                  |

114

115

116 **Table S15** Disordered-ordered classification of proteins studied by CD spectroscopy. Values were computed using  
 117 BeStSel server using mean residue ellipticity as input.

| Protein  | PTM                                 | 197 nm | 206 nm | 233 nm | Prediction |
|----------|-------------------------------------|--------|--------|--------|------------|
| EcAcpP   | <i>apo</i> -                        | 3.89   | -3.33  | -1.52  | ordered    |
|          | <i>holo</i> -                       | 3.77   | -3.11  | -1.23  | ordered    |
|          | <i>C</i> <sub>12</sub> <sup>-</sup> | 5.79   | -4.16  | -1.74  | ordered    |
| ALGO-055 | <i>apo</i> -                        | -4.01  | -5.19  | -1.58  | disordered |
|          | <i>holo</i> -                       | -2.25  | -2.73  | -0.73  | disordered |
|          | <i>C</i> <sub>12</sub> <sup>-</sup> | 1.37   | -4.16  | -1.66  | ordered    |
| ALGO-059 | <i>apo</i> -                        | -4.46  | -4.38  | -1.11  | disordered |
|          | <i>holo</i> -                       | -2.74  | -2.66  | -0.66  | disordered |
|          | <i>C</i> <sub>12</sub> <sup>-</sup> | 1.38   | -4.61  | -1.62  | ordered    |

118

119 **Table S16** Estimated percent helical content of proteins studied by CD spectroscopy across PTM states. Values were  
 120 computed using BeStSel server using mean residue ellipticity as input.

| Protein  | <i>apo</i> - | <i>holo</i> - | <i>C</i> <sub>12</sub> <sup>-</sup> |
|----------|--------------|---------------|-------------------------------------|
| EcAcpP   | 28.1         | 22.2          | 35.0                                |
| ALGO-055 | 15.6         | 5.8           | 21.1                                |
| ALGO-059 | 12.2         | 4.0           | 28.2                                |

121

122

123

124 **Table S17** Positional analysis of ALGO-055 with comparison to *EcAcpP*.

| Position | Residue | vdW / Å | H <sub>KD</sub> | pI    | Rarity (vs input MSA) | Equivalent ( <i>EcAcpP</i> ) | BLOSUM62 (vs. <i>EcAcpP</i> ) | Grantham Distance (vs. <i>EcAcpP</i> ) |
|----------|---------|---------|-----------------|-------|-----------------------|------------------------------|-------------------------------|----------------------------------------|
| 1        | M       | 162.9   | 1.90            | 5.74  | 0.749                 | M                            | 5                             | 0                                      |
| 2        | N       | 122.4   | -3.50           | 5.41  | 0.012                 | S                            | 1                             | 46                                     |
| 3        | P       | 121.6   | -1.60           | 6.30  | 0.001                 | T                            | -1                            | 38                                     |
| 4        | L       | 163.1   | 3.80            | 5.98  | 0.072                 | I                            | 2                             | 5                                      |
| 5        | E       | 138.8   | -3.50           | 3.22  | 0.585                 | E                            | 5                             | 0                                      |
| 6        | Q       | 146.9   | -3.50           | 5.65  | 0.162                 | E                            | 2                             | 29                                     |
| 7        | R       | 190.3   | -4.50           | 10.76 | 0.728                 | R                            | 5                             | 0                                      |
| 8        | V       | 138.2   | 4.20            | 5.96  | 0.933                 | V                            | 4                             | 0                                      |
| 9        | K       | 165.1   | -3.90           | 9.74  | 0.814                 | K                            | 5                             | 0                                      |
| 10       | T       | 119.6   | -0.70           | 5.60  | 0.007                 | K                            | -1                            | 78                                     |
| 11       | I       | 163.0   | 4.50            | 6.02  | 0.898                 | I                            | 4                             | 0                                      |
| 12       | I       | 163.0   | 4.50            | 6.02  | 0.394                 | I                            | 4                             | 0                                      |
| 13       | V       | 138.2   | 4.20            | 5.96  | 0.545                 | G                            | -3                            | 109                                    |
| 14       | Q       | 146.9   | -3.50           | 5.65  | 0.004                 | E                            | 2                             | 29                                     |
| 15       | E       | 138.8   | -3.50           | 3.22  | 0.004                 | Q                            | 2                             | 29                                     |
| 16       | L       | 163.1   | 3.80            | 5.98  | 0.996                 | L                            | 4                             | 0                                      |
| 17       | G       | 63.8    | -0.40           | 5.97  | 0.876                 | G                            | 6                             | 0                                      |
| 18       | V       | 138.2   | 4.20            | 5.96  | 0.915                 | V                            | 4                             | 0                                      |
| 19       | N       | 122.4   | -3.50           | 5.41  | 0.142                 | K                            | 0                             | 94                                     |
| 20       | E       | 138.8   | -3.50           | 3.22  | 0.655                 | Q                            | 2                             | 29                                     |
| 21       | D       | 114.4   | -3.50           | 2.77  | 0.234                 | E                            | 2                             | 45                                     |
| 22       | V       | 138.2   | 4.20            | 5.96  | 0.001                 | E                            | -2                            | 121                                    |
| 23       | V       | 138.2   | 4.20            | 5.96  | 0.867                 | V                            | 4                             | 0                                      |
| 24       | I       | 163.0   | 4.50            | 6.02  | 0.012                 | T                            | -1                            | 89                                     |
| 25       | N       | 122.4   | -3.50           | 5.41  | 0.376                 | N                            | 6                             | 0                                      |
| 26       | D       | 114.4   | -3.50           | 2.77  | 0.100                 | N                            | 1                             | 23                                     |
| 27       | A       | 89.3    | 1.80            | 6.00  | 0.652                 | A                            | 4                             | 0                                      |
| 28       | S       | 89.0    | -0.80           | 5.68  | 0.838                 | S                            | 4                             | 0                                      |
| 29       | F       | 190.8   | 2.80            | 5.48  | 0.983                 | F                            | 6                             | 0                                      |
| 30       | V       | 138.2   | 4.20            | 5.96  | 0.619                 | V                            | 4                             | 0                                      |
| 31       | R       | 190.3   | -4.50           | 10.76 | 0.001                 | E                            | 0                             | 54                                     |
| 32       | D       | 114.4   | -3.50           | 2.77  | 0.999                 | D                            | 6                             | 0                                      |
| 33       | L       | 163.1   | 3.80            | 5.98  | 0.999                 | L                            | 4                             | 0                                      |
| 34       | G       | 63.8    | -0.40           | 5.97  | 0.957                 | G                            | 6                             | 0                                      |
| 35       | A       | 89.3    | 1.80            | 6.00  | 0.984                 | A                            | 4                             | 0                                      |
| 36       | D       | 114.4   | -3.50           | 2.77  | 0.999                 | D                            | 6                             | 0                                      |
| 37       | S       | 89.0    | -0.80           | 5.68  | 0.999                 | S                            | 4                             | 0                                      |
| 38       | L       | 163.1   | 3.80            | 5.98  | 0.999                 | L                            | 4                             | 0                                      |
| 39       | D       | 114.4   | -3.50           | 2.77  | 1.000                 | D                            | 6                             | 0                                      |
| 40       | S       | 89.0    | -0.80           | 5.68  | 0.001                 | T                            | 1                             | 58                                     |
| 41       | V       | 138.2   | 4.20            | 5.96  | 0.971                 | V                            | 4                             | 0                                      |
| 42       | E       | 138.8   | -3.50           | 3.22  | 1.000                 | E                            | 5                             | 0                                      |
| 43       | L       | 163.1   | 3.80            | 5.98  | 0.992                 | L                            | 4                             | 0                                      |
| 44       | V       | 138.2   | 4.20            | 5.96  | 0.784                 | V                            | 4                             | 0                                      |
| 45       | M       | 162.9   | 1.90            | 5.74  | 0.998                 | M                            | 5                             | 0                                      |

|    |   |       |       |      |       |   |    |     |
|----|---|-------|-------|------|-------|---|----|-----|
| 46 | A | 89.3  | 1.80  | 6.00 | 0.848 | A | 4  | 0   |
| 47 | L | 163.1 | 3.80  | 5.98 | 0.695 | L | 4  | 0   |
| 48 | E | 138.8 | -3.50 | 3.22 | 0.998 | E | 5  | 0   |
| 49 | K | 165.1 | -3.90 | 9.74 | 0.113 | E | 1  | 56  |
| 50 | E | 138.8 | -3.50 | 3.22 | 0.850 | E | 5  | 0   |
| 51 | F | 190.8 | 2.80  | 5.48 | 0.996 | F | 6  | 0   |
| 52 | S | 89.0  | -0.80 | 5.68 | 0.025 | D | 0  | 65  |
| 53 | I | 163.0 | 4.50  | 6.02 | 0.258 | T | -1 | 89  |
| 54 | Q | 146.9 | -3.50 | 5.65 | 0.005 | E | 2  | 29  |
| 55 | I | 163.0 | 4.50  | 6.02 | 0.987 | I | 4  | 0   |
| 56 | P | 121.6 | -1.60 | 6.30 | 0.950 | P | 7  | 0   |
| 57 | D | 114.4 | -3.50 | 2.77 | 0.973 | D | 6  | 0   |
| 58 | E | 138.8 | -3.50 | 3.22 | 0.696 | E | 5  | 0   |
| 59 | Q | 146.9 | -3.50 | 5.65 | 0.153 | E | 2  | 29  |
| 60 | A | 89.3  | 1.80  | 6.00 | 0.991 | A | 4  | 0   |
| 61 | E | 138.8 | -3.50 | 3.22 | 0.984 | E | 5  | 0   |
| 62 | K | 165.1 | -3.90 | 9.74 | 0.841 | K | 5  | 0   |
| 63 | I | 163.0 | 4.50  | 6.02 | 0.910 | I | 4  | 0   |
| 64 | I | 163.0 | 4.50  | 6.02 | 0.018 | T | -1 | 89  |
| 65 | Q | 146.9 | -3.50 | 5.65 | 0.001 | T | -1 | 42  |
| 66 | V | 138.2 | 4.20  | 5.96 | 0.948 | V | 4  | 0   |
| 67 | S | 89.0  | -0.80 | 5.68 | 0.009 | Q | 0  | 68  |
| 68 | A | 89.3  | 1.80  | 6.00 | 0.142 | A | 4  | 0   |
| 69 | A | 89.3  | 1.80  | 6.00 | 0.869 | A | 4  | 0   |
| 70 | I | 163.0 | 4.50  | 6.02 | 0.669 | I | 4  | 0   |
| 71 | D | 114.4 | -3.50 | 2.77 | 0.559 | D | 6  | 0   |
| 72 | Y | 194.6 | -1.30 | 5.66 | 0.832 | Y | 7  | 0   |
| 73 | A | 89.3  | 1.80  | 6.00 | 0.018 | I | -1 | 94  |
| 74 | E | 138.8 | -3.50 | 3.22 | 0.309 | N | 0  | 42  |
| 75 | K | 165.1 | -3.90 | 9.74 | 0.108 | G | -2 | 127 |
| 76 | A | 89.3  | 1.80  | 6.00 | 0.030 | H | -2 | 86  |
| 77 | A | 89.3  | 1.80  | 6.00 | 0.079 | Q | -1 | 91  |
| 78 | K | 165.1 | -3.90 | 9.74 | 0.137 | A | -1 | 106 |

126 **Table S18** Positional analysis of ALGO-059 with comparison to *EcAcpP*.

| Position | Residue | vdW / Å | H <sub>KD</sub> | pI    | Rarity (vs input MSA) | Equivalent ( <i>EcAcpP</i> ) | BLOSUM62 (vs. <i>EcAcpP</i> ) | Grantham Distance (vs. <i>EcAcpP</i> ) |
|----------|---------|---------|-----------------|-------|-----------------------|------------------------------|-------------------------------|----------------------------------------|
| 1        | M       | 162.9   | 1.90            | 5.74  | 0.749                 | M                            | 5                             | 0                                      |
| 2        | S       | 89.0    | -0.80           | 5.68  | 0.624                 | S                            | 4                             | 0                                      |
| 3        | N       | 122.4   | -3.50           | 5.41  | 0.206                 | T                            | 0                             | 65                                     |
| 4        | L       | 163.1   | 3.80            | 5.98  | 0.072                 | I                            | 2                             | 5                                      |
| 5        | D       | 114.4   | -3.50           | 2.77  | 0.016                 | E                            | 2                             | 45                                     |
| 6        | Q       | 146.9   | -3.50           | 5.65  | 0.162                 | E                            | 2                             | 29                                     |
| 7        | R       | 190.3   | -4.50           | 10.76 | 0.728                 | R                            | 5                             | 0                                      |
| 8        | V       | 138.2   | 4.20            | 5.96  | 0.933                 | V                            | 4                             | 0                                      |
| 9        | I       | 163.0   | 4.50            | 6.02  | 0.032                 | K                            | -3                            | 102                                    |
| 10       | D       | 114.4   | -3.50           | 2.77  | 0.050                 | K                            | -1                            | 101                                    |
| 11       | I       | 163.0   | 4.50            | 6.02  | 0.898                 | I                            | 4                             | 0                                      |
| 12       | I       | 163.0   | 4.50            | 6.02  | 0.394                 | I                            | 4                             | 0                                      |
| 13       | V       | 138.2   | 4.20            | 5.96  | 0.545                 | G                            | -3                            | 109                                    |
| 14       | Q       | 146.9   | -3.50           | 5.65  | 0.004                 | E                            | 2                             | 29                                     |
| 15       | E       | 138.8   | -3.50           | 3.22  | 0.004                 | Q                            | 2                             | 29                                     |
| 16       | L       | 163.1   | 3.80            | 5.98  | 0.996                 | L                            | 4                             | 0                                      |
| 17       | G       | 63.8    | -0.40           | 5.97  | 0.876                 | G                            | 6                             | 0                                      |
| 18       | V       | 138.2   | 4.20            | 5.96  | 0.915                 | V                            | 4                             | 0                                      |
| 19       | P       | 121.6   | -1.60           | 6.30  | 0.006                 | K                            | -1                            | 103                                    |
| 20       | P       | 121.6   | -1.60           | 6.30  | 0.084                 | Q                            | -1                            | 76                                     |
| 21       | K       | 165.1   | -3.90           | 9.74  | 0.013                 | E                            | 1                             | 56                                     |
| 22       | E       | 138.8   | -3.50           | 3.22  | 0.611                 | E                            | 5                             | 0                                      |
| 23       | V       | 138.2   | 4.20            | 5.96  | 0.867                 | V                            | 4                             | 0                                      |
| 24       | K       | 165.1   | -3.90           | 9.74  | 0.347                 | T                            | -1                            | 78                                     |
| 25       | S       | 89.0    | -0.80           | 5.68  | 0.047                 | N                            | 1                             | 46                                     |
| 26       | E       | 138.8   | -3.50           | 3.22  | 0.568                 | N                            | 0                             | 42                                     |
| 27       | A       | 89.3    | 1.80            | 6.00  | 0.652                 | A                            | 4                             | 0                                      |
| 28       | S       | 89.0    | -0.80           | 5.68  | 0.838                 | S                            | 4                             | 0                                      |
| 29       | F       | 190.8   | 2.80            | 5.48  | 0.983                 | F                            | 6                             | 0                                      |
| 30       | I       | 163.0   | 4.50            | 6.02  | 0.241                 | V                            | 3                             | 29                                     |
| 31       | K       | 165.1   | -3.90           | 9.74  | 0.032                 | E                            | 1                             | 56                                     |
| 32       | D       | 114.4   | -3.50           | 2.77  | 0.999                 | D                            | 6                             | 0                                      |
| 33       | L       | 163.1   | 3.80            | 5.98  | 0.999                 | L                            | 4                             | 0                                      |
| 34       | G       | 63.8    | -0.40           | 5.97  | 0.957                 | G                            | 6                             | 0                                      |
| 35       | A       | 89.3    | 1.80            | 6.00  | 0.984                 | A                            | 4                             | 0                                      |
| 36       | D       | 114.4   | -3.50           | 2.77  | 0.999                 | D                            | 6                             | 0                                      |
| 37       | S       | 89.0    | -0.80           | 5.68  | 0.999                 | S                            | 4                             | 0                                      |
| 38       | L       | 163.1   | 3.80            | 5.98  | 0.999                 | L                            | 4                             | 0                                      |
| 39       | D       | 114.4   | -3.50           | 2.77  | 1.000                 | D                            | 6                             | 0                                      |
| 40       | T       | 119.6   | -0.70           | 5.60  | 0.784                 | T                            | 5                             | 0                                      |
| 41       | V       | 138.2   | 4.20            | 5.96  | 0.971                 | V                            | 4                             | 0                                      |
| 42       | E       | 138.8   | -3.50           | 3.22  | 1.000                 | E                            | 5                             | 0                                      |
| 43       | L       | 163.1   | 3.80            | 5.98  | 0.992                 | L                            | 4                             | 0                                      |
| 44       | I       | 163.0   | 4.50            | 6.02  | 0.209                 | V                            | 3                             | 29                                     |

|    |   |       |       |      |       |   |    |     |
|----|---|-------|-------|------|-------|---|----|-----|
| 45 | M | 162.9 | 1.90  | 5.74 | 0.998 | M | 5  | 0   |
| 46 | S | 89.0  | -0.80 | 5.68 | 0.007 | A | 1  | 99  |
| 47 | I | 163.0 | 4.50  | 6.02 | 0.001 | L | 2  | 5   |
| 48 | E | 138.8 | -3.50 | 3.22 | 0.998 | E | 5  | 0   |
| 49 | E | 138.8 | -3.50 | 3.22 | 0.845 | E | 5  | 0   |
| 50 | D | 114.4 | -3.50 | 2.77 | 0.001 | E | 2  | 45  |
| 51 | F | 190.8 | 2.80  | 5.48 | 0.996 | F | 6  | 0   |
| 52 | N | 122.4 | -3.50 | 5.41 | 0.112 | D | 1  | 23  |
| 53 | V | 138.2 | 4.20  | 5.96 | 0.119 | T | 0  | 69  |
| 54 | E | 138.8 | -3.50 | 3.22 | 0.869 | E | 5  | 0   |
| 55 | I | 163.0 | 4.50  | 6.02 | 0.987 | I | 4  | 0   |
| 56 | P | 121.6 | -1.60 | 6.30 | 0.950 | P | 7  | 0   |
| 57 | D | 114.4 | -3.50 | 2.77 | 0.973 | D | 6  | 0   |
| 58 | E | 138.8 | -3.50 | 3.22 | 0.696 | E | 5  | 0   |
| 59 | D | 114.4 | -3.50 | 2.77 | 0.186 | E | 2  | 45  |
| 60 | A | 89.3  | 1.80  | 6.00 | 0.991 | A | 4  | 0   |
| 61 | E | 138.8 | -3.50 | 3.22 | 0.984 | E | 5  | 0   |
| 62 | H | 157.5 | -3.20 | 7.59 | 0.012 | K | -1 | 32  |
| 63 | I | 163.0 | 4.50  | 6.02 | 0.910 | I | 4  | 0   |
| 64 | T | 119.6 | -0.70 | 5.60 | 0.548 | T | 5  | 0   |
| 65 | T | 119.6 | -0.70 | 5.60 | 0.892 | T | 5  | 0   |
| 66 | V | 138.2 | 4.20  | 5.96 | 0.948 | V | 4  | 0   |
| 67 | A | 89.3  | 1.80  | 6.00 | 0.010 | Q | -1 | 91  |
| 68 | S | 89.0  | -0.80 | 5.68 | 0.032 | A | 1  | 99  |
| 69 | V | 138.2 | 4.20  | 5.96 | 0.124 | A | 0  | 64  |
| 70 | L | 163.1 | 3.80  | 5.98 | 0.010 | I | 2  | 5   |
| 71 | N | 122.4 | -3.50 | 5.41 | 0.057 | D | 1  | 23  |
| 72 | Y | 194.6 | -1.30 | 5.66 | 0.832 | Y | 7  | 0   |
| 73 | L | 163.1 | 3.80  | 5.98 | 0.056 | I | 2  | 5   |
| 74 | N | 122.4 | -3.50 | 5.41 | 0.250 | N | 6  | 0   |
| 75 | E | 138.8 | -3.50 | 3.22 | 0.164 | G | -2 | 98  |
| 76 | H | 157.5 | -3.20 | 7.59 | 0.342 | H | 8  | 0   |
| 77 | S | 89.0  | -0.80 | 5.68 | 0.050 | Q | 0  | 68  |
| 78 | N | 122.4 | -3.50 | 5.41 | 0.009 | A | -2 | 111 |

128 **Table S19** Positional comparison between ALGO-055 and ALGO-059

| Position | ALGO-055 | ALGO-059 | BLOSUM62 | Grantham Distance |
|----------|----------|----------|----------|-------------------|
| 1        | M        | M        | 5        | 0                 |
| 2        | N        | S        | 1        | 46                |
| 3        | P        | N        | -2       | 91                |
| 4        | L        | L        | 4        | 0                 |
| 5        | E        | D        | 2        | 45                |
| 6        | Q        | Q        | 5        | 0                 |
| 7        | R        | R        | 5        | 0                 |
| 8        | V        | V        | 4        | 0                 |
| 9        | K        | I        | -3       | 102               |
| 10       | T        | D        | -1       | 85                |
| 11       | I        | I        | 4        | 0                 |
| 12       | I        | I        | 4        | 0                 |
| 13       | V        | V        | 4        | 0                 |
| 14       | Q        | Q        | 5        | 0                 |
| 15       | E        | E        | 5        | 0                 |
| 16       | L        | L        | 4        | 0                 |
| 17       | G        | G        | 6        | 0                 |
| 18       | V        | V        | 4        | 0                 |
| 19       | N        | P        | -2       | 91                |
| 20       | E        | P        | -1       | 93                |
| 21       | D        | K        | -1       | 101               |
| 22       | V        | E        | -2       | 121               |
| 23       | V        | V        | 4        | 0                 |
| 24       | I        | K        | -3       | 102               |
| 25       | N        | S        | 1        | 46                |
| 26       | D        | E        | 2        | 45                |
| 27       | A        | A        | 4        | 0                 |
| 28       | S        | S        | 4        | 0                 |
| 29       | F        | F        | 6        | 0                 |
| 30       | V        | I        | 3        | 29                |
| 31       | R        | K        | 2        | 26                |
| 32       | D        | D        | 6        | 0                 |
| 33       | L        | L        | 4        | 0                 |
| 34       | G        | G        | 6        | 0                 |
| 35       | A        | A        | 4        | 0                 |
| 36       | D        | D        | 6        | 0                 |
| 37       | S        | S        | 4        | 0                 |
| 38       | L        | L        | 4        | 0                 |
| 39       | D        | D        | 6        | 0                 |
| 40       | S        | T        | 1        | 58                |
| 41       | V        | V        | 4        | 0                 |
| 42       | E        | E        | 5        | 0                 |
| 43       | L        | L        | 4        | 0                 |
| 44       | V        | I        | 3        | 29                |
| 45       | M        | M        | 5        | 0                 |

|    |   |   |    |    |
|----|---|---|----|----|
| 46 | A | S | 1  | 99 |
| 47 | L | I | 2  | 5  |
| 48 | E | E | 5  | 0  |
| 49 | K | E | 1  | 56 |
| 50 | E | D | 2  | 45 |
| 51 | F | F | 6  | 0  |
| 52 | S | N | 1  | 46 |
| 53 | I | V | 3  | 29 |
| 54 | Q | E | 2  | 29 |
| 55 | I | I | 4  | 0  |
| 56 | P | P | 7  | 0  |
| 57 | D | D | 6  | 0  |
| 58 | E | E | 5  | 0  |
| 59 | Q | D | 0  | 61 |
| 60 | A | A | 4  | 0  |
| 61 | E | E | 5  | 0  |
| 62 | K | H | -1 | 32 |
| 63 | I | I | 4  | 0  |
| 64 | I | T | -1 | 89 |
| 65 | Q | T | -1 | 42 |
| 66 | V | V | 4  | 0  |
| 67 | S | A | 1  | 99 |
| 68 | A | S | 1  | 99 |
| 69 | A | V | 0  | 64 |
| 70 | I | L | 2  | 5  |
| 71 | D | N | 1  | 23 |
| 72 | Y | Y | 7  | 0  |
| 73 | A | L | -1 | 96 |
| 74 | E | N | 0  | 42 |
| 75 | K | E | 1  | 56 |
| 76 | A | H | -2 | 86 |
| 77 | A | S | 1  | 99 |
| 78 | K | N | 0  | 94 |

130 **Table S20** Analysis of amino acid variants found exclusively in unsuccessful ALGO sequences.

| Position | Variant | Count | Rarity (vs input MSA) | Equivalent (EcAcpP) | BLOSUM62 (vs EcAcpP) | Grantham Distance (vs EcAcpP) |
|----------|---------|-------|-----------------------|---------------------|----------------------|-------------------------------|
| 2        | M       | 1     | 0.1066                | S                   | -1                   | 135                           |
| 3        | E       | 2     | 0.0711                | T                   | 1                    | 58                            |
|          | S       | 1     | 0.1703                |                     | -1                   | 65                            |
|          | D       | 1     | 0.2303                |                     | -1                   | 85                            |
| 4        | T       | 1     | 0.0531                | I                   | -1                   | 89                            |
|          | V       | 1     | 0.2109                |                     | 3                    | 29                            |
| 5        | P       | 1     | 0.0005                | E                   | -3                   | 140                           |
|          | N       | 1     | 0.0028                |                     | -3                   | 134                           |
|          | I       | 1     | 0.0078                |                     | 0                    | 80                            |
|          | S       | 1     | 0.0134                |                     | 0                    | 42                            |
|          | F       | 1     | 0.0964                |                     | -1                   | 93                            |
| 6        | R       | 1     | 0.0005                | E                   | 1                    | 56                            |
|          | K       | 1     | 0.0166                |                     | 2                    | 45                            |
|          | D       | 2     | 0.1657                |                     | 0                    | 54                            |
| 7        | K       | 4     | 0.1357                | R                   | 2                    | 26                            |
| 9        | E       | 1     | 0.0009                | K                   | 1                    | 56                            |
|          | Q       | 2     | 0.0249                |                     | 1                    | 53                            |
| 10       | R       | 1     | 0.0078                | K                   | -1                   | 106                           |
|          | A       | 1     | 0.1269                |                     | 2                    | 26                            |
| 11       | V       | 1     | 0.0868                | I                   | 3                    | 29                            |
| 12       | L       | 1     | 0.0005                | I                   | 3                    | 29                            |
|          | V       | 4     | 0.5976                |                     | 2                    | 5                             |
| 13       | L       | 1     | 0.0037                | G                   | 0                    | 60                            |
|          | A       | 1     | 0.2903                |                     | -4                   | 138                           |
| 14       | N       | 1     | 0.0028                | E                   | 0                    | 42                            |
|          | D       | 1     | 0.1375                |                     | 2                    | 45                            |
| 15       | N       | 1     | 0.0014                | Q                   | 0                    | 46                            |
| 19       | V       | 1     | 0.0005                | K                   | 1                    | 53                            |
|          | G       | 1     | 0.0032                |                     | -2                   | 97                            |
|          | Q       | 1     | 0.0037                |                     | -2                   | 127                           |
|          | E       | 1     | 0.1592                |                     | 1                    | 56                            |
| 20       | G       | 1     | 0.0037                | Q                   | -2                   | 87                            |
|          | V       | 1     | 0.0212                |                     | -2                   | 96                            |
| 21       | P       | 1     | 0.0014                | E                   | -1                   | 65                            |
|          | V       | 1     | 0.0023                |                     | 0                    | 42                            |
|          | T       | 2     | 0.0171                |                     | -1                   | 93                            |
|          | N       | 1     | 0.0268                |                     | -2                   | 121                           |
| 22       | K       | 2     | 0.1384                | E                   | 1                    | 56                            |
| 24       | H       | 1     | 0.0018                | T                   | -1                   | 42                            |
|          | Q       | 1     | 0.0171                |                     | 0                    | 69                            |
|          | V       | 1     | 0.066                 |                     | -2                   | 47                            |
| 25       | T       | 1     | 0.042                 | N                   | 0                    | 65                            |
|          | L       | 1     | 0.0452                |                     | 0                    | 42                            |
|          | E       | 1     | 0.1343                |                     | -3                   | 153                           |
| 26       | H       | 1     | 0.0046                | N                   | 1                    | 46                            |

|    |   |   |        |   |    |     |
|----|---|---|--------|---|----|-----|
|    | S | 2 | 0.1029 |   | 1  | 68  |
| 27 | S | 2 | 0.3096 | A | 1  | 99  |
| 28 | I | 1 | 0.0009 | S | 1  | 99  |
|    | A | 3 | 0.012  |   | -2 | 142 |
| 30 | A | 1 | 0.006  | V | 0  | 64  |
| 31 | Q | 2 | 0.0014 | E | 0  | 42  |
|    | N | 1 | 0.1444 |   | 2  | 45  |
|    | D | 1 | 0.1444 |   | 2  | 29  |
| 40 | F | 1 | 0.0005 | T | -2 | 103 |
|    | Q | 1 | 0.0028 |   | -1 | 42  |
| 44 | L | 1 | 0.0023 | V | 1  | 32  |
| 46 | T | 1 | 0.0245 | A | 0  | 58  |
| 47 | M | 1 | 0.0111 | L | 0  | 22  |
|    | F | 1 | 0.2921 |   | 2  | 15  |
| 49 | N | 1 | 0.0009 | E | 0  | 42  |
| 50 | S | 1 | 0.0005 | E | -1 | 107 |
|    | Q | 2 | 0.0097 |   | 0  | 80  |
|    | A | 1 | 0.0208 |   | 2  | 29  |
| 52 | H | 1 | 0.0009 | D | -1 | 81  |
| 53 | F | 1 | 0.0175 | T | -1 | 149 |
|    | C | 1 | 0.1957 |   | -2 | 103 |
| 54 | N | 1 | 0.0032 | E | -1 | 107 |
|    | D | 1 | 0.0065 |   | 0  | 42  |
|    | A | 1 | 0.0443 |   | 2  | 45  |
| 58 | D | 2 | 0.2635 | E | 2  | 45  |
| 59 | T | 1 | 0.0005 | E | -1 | 65  |
|    | H | 2 | 0.0042 |   | 0  | 40  |
| 62 | D | 2 | 0.0014 | K | -1 | 78  |
|    | T | 1 | 0.0554 |   | -1 | 101 |
| 64 | S | 1 | 0.0535 | T | 1  | 58  |
| 65 | S | 1 | 0.0475 | T | 1  | 58  |
| 68 | F | 1 | 0.0018 | A | -2 | 113 |
|    | Q | 2 | 0.2843 |   | -2 | 126 |
|    | D | 1 | 0.3899 |   | -1 | 91  |
| 70 | V | 2 | 0.2796 | I | 3  | 29  |
| 71 | L | 1 | 0.0005 | D | 0  | 65  |
|    | H | 2 | 0.0009 |   | -1 | 81  |
|    | S | 1 | 0.0655 |   | -4 | 172 |
| 73 | V | 1 | 0.2635 | I | 3  | 29  |
| 74 | G | 1 | 0.0078 | N | 0  | 65  |
|    | T | 2 | 0.0951 |   | 0  | 80  |
| 75 | D | 1 | 0.0406 | G | 0  | 60  |
|    | N | 1 | 0.084  |   | 0  | 80  |
|    | A | 2 | 0.3009 |   | -1 | 94  |
| 76 | S | 1 | 0.0129 | H | -1 | 89  |
|    | Q | 1 | 0.0152 |   | -1 | 32  |
|    | K | 1 | 0.0452 |   | 1  | 68  |

|    |   |   |        |   |    |    |
|----|---|---|--------|---|----|----|
|    | N | 1 | 0.2884 |   | 0  | 24 |
| 78 | G | 1 | 0.0097 | A | 0  | 60 |
|    | Q | 1 | 0.0125 |   | -1 | 91 |

131

132 **Sequence Analysis (Fig. S1-3)**

133

134

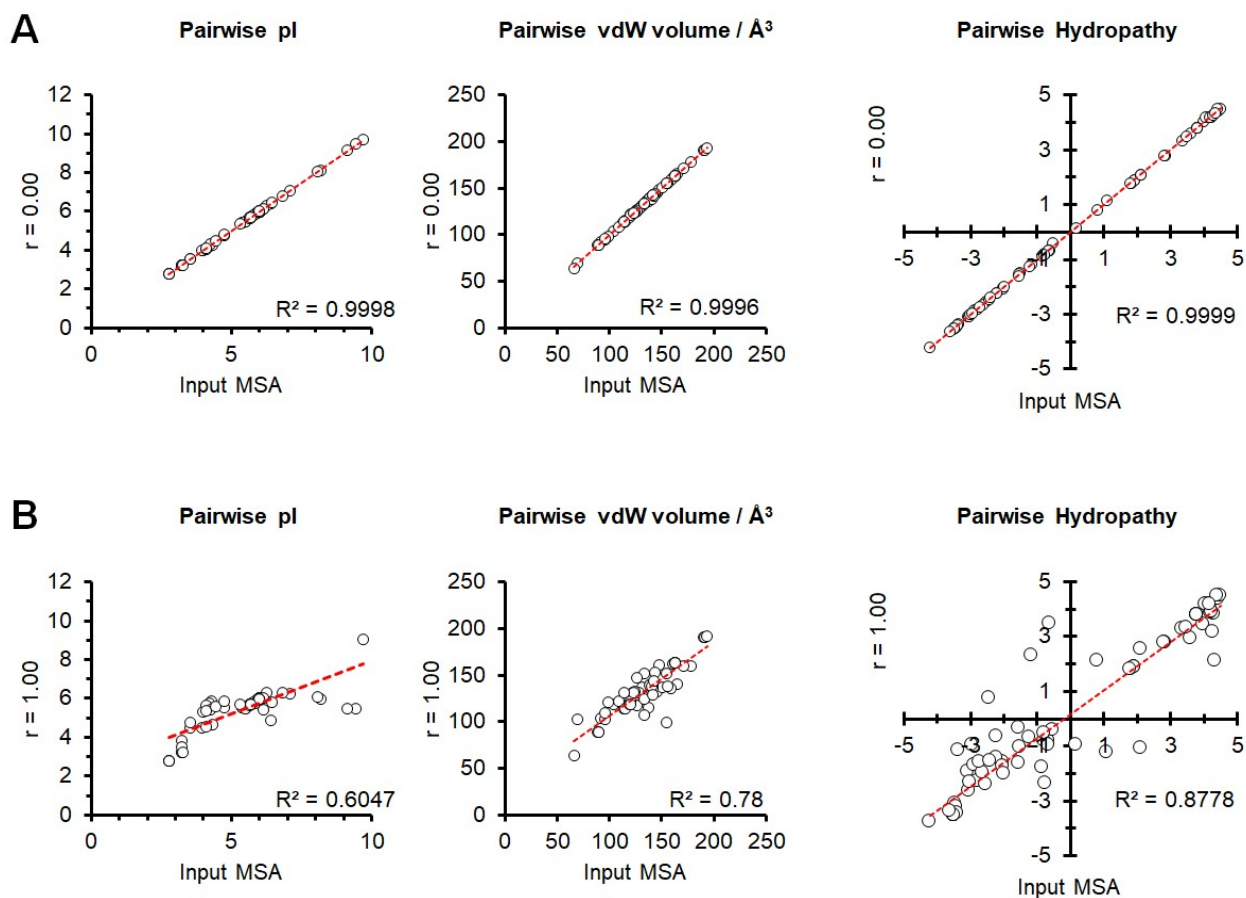

**Fig. S1** Example pairwise correlation plots for sequence sets  $r = 0.00$  (A) and  $r = 1.00$  (B).

135

136

|               |   |    |   |    |    |    |    |    |   |    |    |    |    |    |    |    |    |    |    |    |   |    |    |    |   |    |   |    |   |   |   |   |   |   |   |   |   |   |   |   |   |   |   |   |   |   |   |   |   |   |   |   |   |   |   |
|---------------|---|----|---|----|----|----|----|----|---|----|----|----|----|----|----|----|----|----|----|----|---|----|----|----|---|----|---|----|---|---|---|---|---|---|---|---|---|---|---|---|---|---|---|---|---|---|---|---|---|---|---|---|---|---|---|
| <i>EcAcpP</i> | 1 | MS | T | IE | ER | V  | KK | I  | I | GE | Q  | LG | V  | K  | Q  | EE | V  | T  | NN | AS | F | V  | E  | DL | G | A  | D | S  | L | D | T | V | E | L | V | M | A | L | E | E | F | D | T | E | I | P | D | E | E | A |   |   |   |   |   |
| ALGO-013      | 1 | MS | T | LP | DK | V  | KK | I  | V | AD | Q  | LG | V  | K  | EP | K  | V  | KN | HA | S  | F | I  | Q  | DL | G | A  | D | S  | L | D | T | V | E | L | V | M | S | M | E | E | D | F | D | V | E | I | P | D | D | T | A |   |   |   |   |
| ALGO-023      | 1 | MM | S | T  | ND | K  | V  | E  | K | I  | V  | L  | N  | E  | LG | V  | GE | TE | V  | Q  | L | D  | A  | I  | F | V  | D | DL | G | A | D | S | L | D | S | V | E | L | I | M | T | L | E | N | S | F | D | I | Q | I | P | D | D | H | A |
| ALGO-040      | 1 | MN | D | V  | S  | QR | V  | QR | V | LG | EQ | LG | V  | VE | TE | V  | V  | T  | S  | AA | F | V  | E  | DL | G | A  | D | S  | L | D | T | V | E | L | V | M | S | L | E | E | A | F | N | F | N | I | P | D | E | H | A |   |   |   |   |
| ALGO-044      | 1 | MS | E | I  | IK | K  | V  | KK | I | V  | VE | LG | V  | Q  | NE | V  | H  | ES | SA | F  | V | Q  | DL | G  | A | D  | S | L  | D | F | V | E | L | I | M | S | F | E | E | Q | F | H | T | A | I | P | D | E | D | A |   |   |   |   |   |
| ALGO-055      | 1 | MN | P | L  | E  | QR | V  | KT | I | I  | V  | QE | LG | V  | N  | E  | D  | V  | I  | N  | D | AS | F  | V  | R | DL | G | A  | D | S | L | D | S | V | E | L | V | M | A | L | E | K | E | F | S | I | Q | I | P | D | E | Q | A |   |   |
| ALGO-057      | 1 | MN | E | L  | FR | K  | V  | QA | I | V  | VE | LG | V  | EG | V  | K  | V  | T  | NE | SA | F | A  | N  | DL | G | A  | D | S  | L | D | Q | V | E | L | L | M | A | T | E | E | Q | F | D | C | D | I | P | D | E | E | A |   |   |   |   |
| ALGO-059      | 1 | MS | N | L  | D  | QR | V  | ID | I | I  | V  | QE | LG | V  | PP | KE | V  | K  | SE | AS | F | I  | K  | DL | G | A  | D | S  | L | D | T | V | E | L | I | M | S | I | E | E | D | F | N | V | E | I | P | D | E | D | A |   |   |   |   |

|               |    |   |   |   |   |   |   |   |   |   |   |   |   |   |   |   |   |   |   |
|---------------|----|---|---|---|---|---|---|---|---|---|---|---|---|---|---|---|---|---|---|
| <i>EcAcpP</i> | 61 | E | K | I | T | T | V | Q | A | A | I | D | Y | I | N | G | H | Q | A |
| ALGO-013      | 61 | E | K | I | S | S | V | A | Q | A | I | D | Y | V | T | D | H | S | A |
| ALGO-023      | 61 | E | T | I | T | T | V | Q | F | A | V | S | Y | A | T | A | K | S | K |
| ALGO-040      | 61 | E | D | I | T | Q | V | Q | S | A | V | H | Y | I | N | E | Q | S | A |
| ALGO-044      | 61 | E | K | I | I | T | V | A | Q | A | I | H | Y | I | N | N | S | G |   |
| ALGO-055      | 61 | E | K | I | I | Q | V | S | A | A | I | D | Y | A | E | K | A | A | K |
| ALGO-057      | 61 | E | D | I | I | T | V | A | D | A | I | L | Y | I | G | A | S | S | Q |
| ALGO-059      | 61 | E | H | I | T | T | V | A | S | V | L | N | Y | L | N | E | H | S | N |

Fig. S2 Multiple sequence alignment of ALGO-CP candidates and *EcAcpP*.

137  
138  
139  
140

|               |   |    |   |    |    |    |    |    |   |    |   |    |    |   |    |    |   |   |    |    |    |    |   |    |    |    |   |   |   |   |   |   |   |   |   |   |   |   |   |   |   |   |   |   |   |   |   |   |   |   |   |   |   |
|---------------|---|----|---|----|----|----|----|----|---|----|---|----|----|---|----|----|---|---|----|----|----|----|---|----|----|----|---|---|---|---|---|---|---|---|---|---|---|---|---|---|---|---|---|---|---|---|---|---|---|---|---|---|---|
| <i>EcAcpP</i> | 1 | MS | T | IE | ER | V  | KK | I  | I | GE | Q | LG | V  | K | Q  | EE | V | T | NN | AS | F  | V  | E | DL | G  | A  | D | S | L | D | T | V | E | L | V | M | A | L | E | E | F | D | T | E | I | P | D | E | E | A |   |   |   |
| ALGO-055      | 1 | MN | P | L  | E  | QR | V  | KT | I | I  | V | QE | LG | V | N  | E  | D | V | I  | N  | D  | AS | F | V  | R  | DL | G | A | D | S | L | D | S | V | E | L | V | M | A | L | E | K | E | F | S | I | Q | I | P | D | E | Q | A |
| ALGO-059      | 1 | MS | N | L  | D  | QR | V  | ID | I | I  | V | QE | LG | V | PP | KE | V | K | SE | AS | F  | I  | K | DL | G  | A  | D | S | L | D | T | V | E | L | I | M | S | I | E | E | D | F | N | V | E | I | P | D | E | D | A |   |   |
| chALGO-009    | 1 | MN | P | L  | D  | QR | V  | IT | I | I  | V | QE | LG | V | PP | KE | V | K | S  | D  | AS | F  | V | K  | DL | G  | A | D | S | L | D | T | V | E | L | I | M | S | I | E | K | E | F | S | V | Q | I | P | D | E | D | A |   |
| chALGO-012    | 1 | MS | N | L  | D  | QR | V  | ID | I | I  | V | QE | LG | V | NP | D  | V | V | K  | SE | AS | F  | I | K  | DL | G  | A | D | S | L | D | T | V | E | L | I | M | S | I | E | K | D | F | S | I | Q | I | P | D | E | D | A |   |
| chALGO-024    | 1 | MS | P | L  | D  | QR | V  | ID | I | I  | V | QE | LG | V | NP | D  | V | V | K  | SE | AS | F  | I | K  | DL | G  | A | D | S | L | D | T | V | E | L | I | M | A | L | E | K | D | F | S | I | Q | I | P | D | E | D | A |   |
| chALGO-044    | 1 | MN | N | L  | E  | QR | V  | KD | I | I  | V | QE | LG | V | N  | E  | D | V | I  | S  | D  | AS | F | I  | K  | DL | G | A | D | S | L | D | T | V | E | L | I | M | A | L | E | E | D | F | N | V | E | I | P | D | E | D | A |
| chALGO-097    | 1 | MS | N | L  | E  | QR | V  | KT | I | I  | V | QE | LG | V | PE | K  | V | V | I  | N  | D  | AS | F | V  | K  | DL | G | A | D | S | L | D | T | V | E | L | I | M | S | L | E | K | E | F | N | I | E | I | P | D | E | D | A |

|               |    |   |   |   |   |   |   |   |   |   |   |   |   |   |   |   |   |   |   |
|---------------|----|---|---|---|---|---|---|---|---|---|---|---|---|---|---|---|---|---|---|
| <i>EcAcpP</i> | 61 | E | K | I | T | T | V | Q | A | A | I | D | Y | I | N | G | H | Q | A |
| ALGO-055      | 61 | E | K | I | I | Q | V | S | A | A | I | D | Y | A | E | K | A | A | K |
| ALGO-059      | 61 | E | H | I | T | T | V | A | S | V | L | N | Y | L | N | E | H | S | N |
| chALGO-009    | 61 | E | H | I | T | T | V | S | A | V | L | D | Y | A | N | K | H | A | N |
| chALGO-012    | 61 | E | H | I | I | Q | V | S | A | A | L | N | Y | A | E | E | H | A | N |
| chALGO-024    | 61 | E | K | I | I | T | V | A | A | V | I | D | Y | L | N | E | H | A | N |
| chALGO-044    | 61 | E | K | I | T | T | V | A | A | A | I | N | Y | A | E | K | H | S | N |
| chALGO-097    | 61 | E | H | I | I | T | V | A | S | V | I | N | Y | A | N | K | A | S | K |

Fig. S3 Multiple sequence alignment of <sup>ch</sup>ALGO-CP chimeras, parental ALGO-055 and ALGO-059, and *EcAcpP*.

141  
142  
143  
144  
145  
146

147 **Purification Data (Figs. S4-S14)**

148

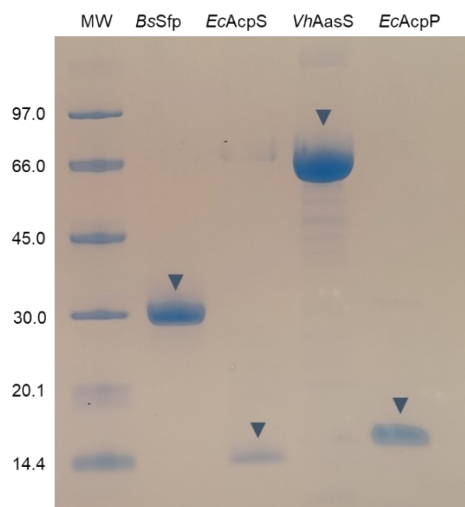

**Fig. S4** Annotated SDS-PAGE gel photograph showing purified *BsSfp*, *EcAcpS*, *VhAasS* and *EcAcpP*. An Amersham low molecular weight calibration kit was used as the protein ladder (lane MW).

149

150

151

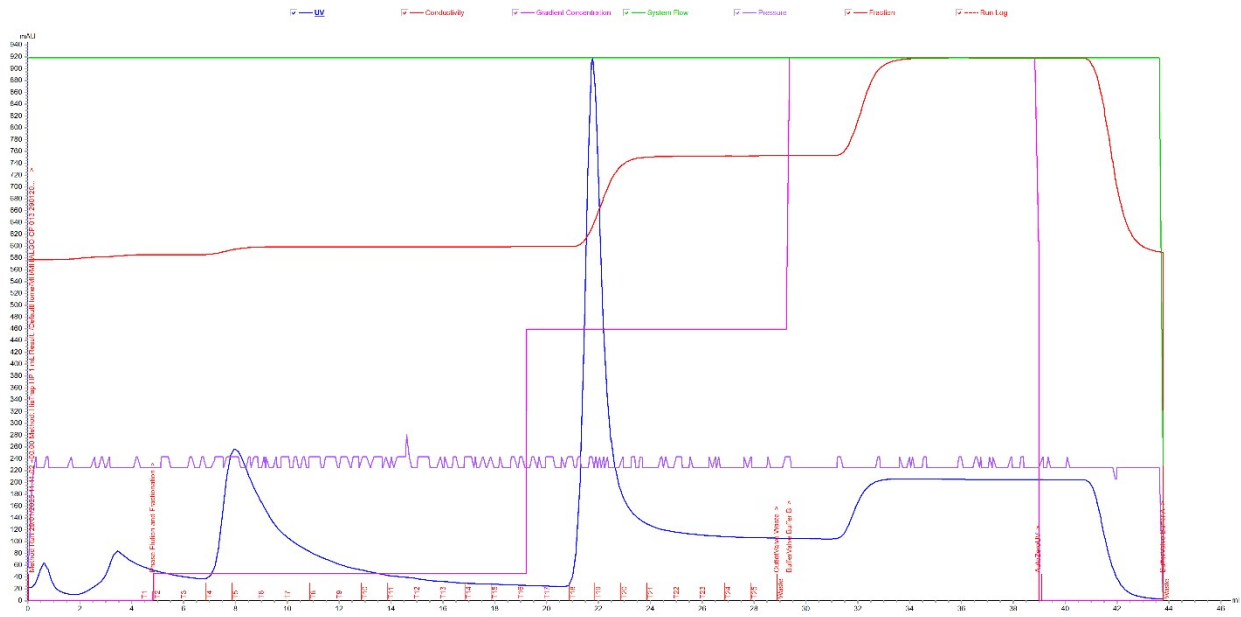

Fig. S5 A<sub>280</sub> chromatogram of ALGO-013 purification by Ni<sup>2+</sup>-affinity chromatography.

152

153

154

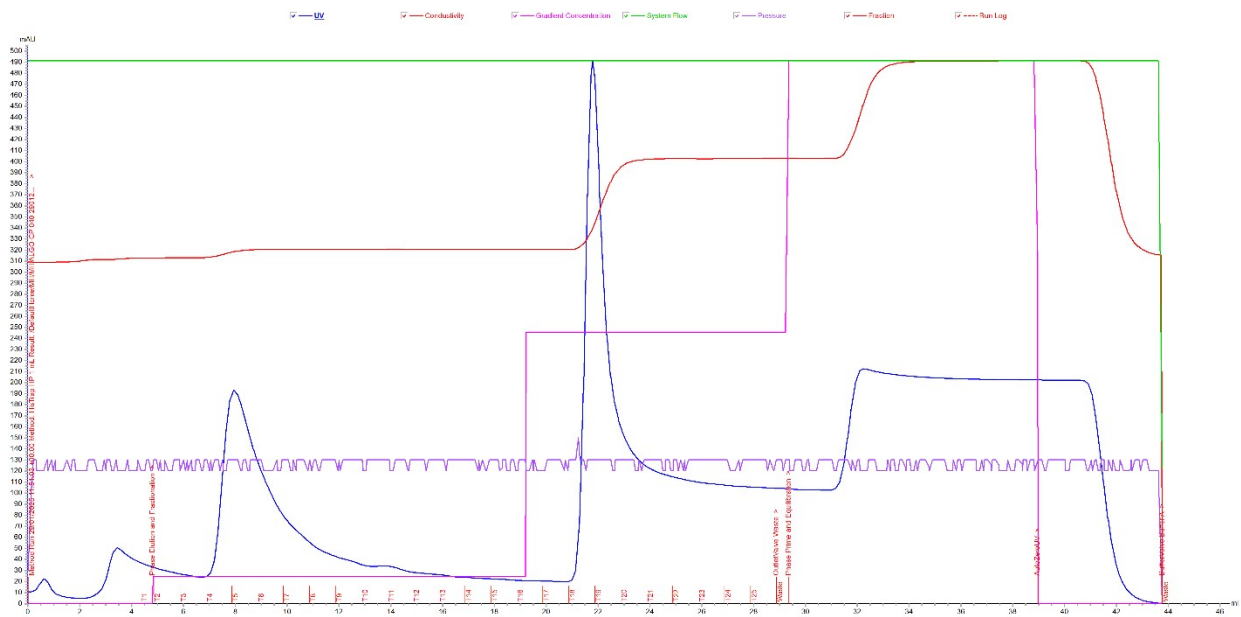

Fig. S6 A<sub>280</sub> chromatogram of ALGO-040 purification by Ni<sup>2+</sup>-affinity chromatography.

155

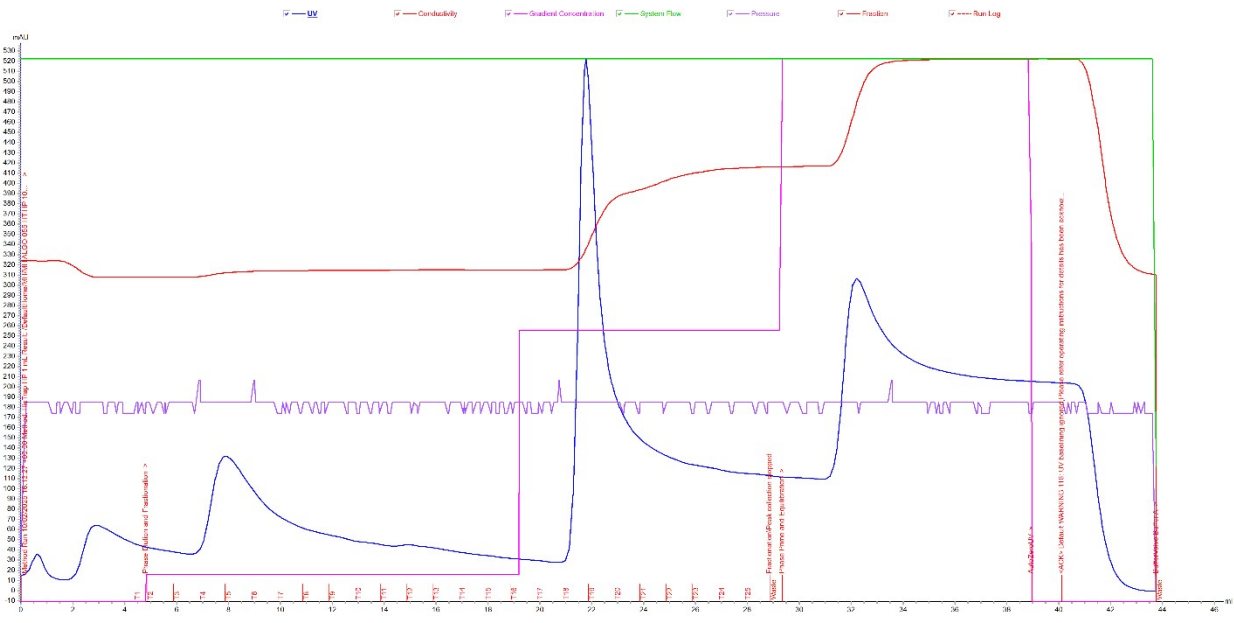

Fig. S7 A<sub>280</sub> chromatogram of ALGO-055 purification by Ni<sup>2+</sup>-affinity chromatography.

156  
157  
158

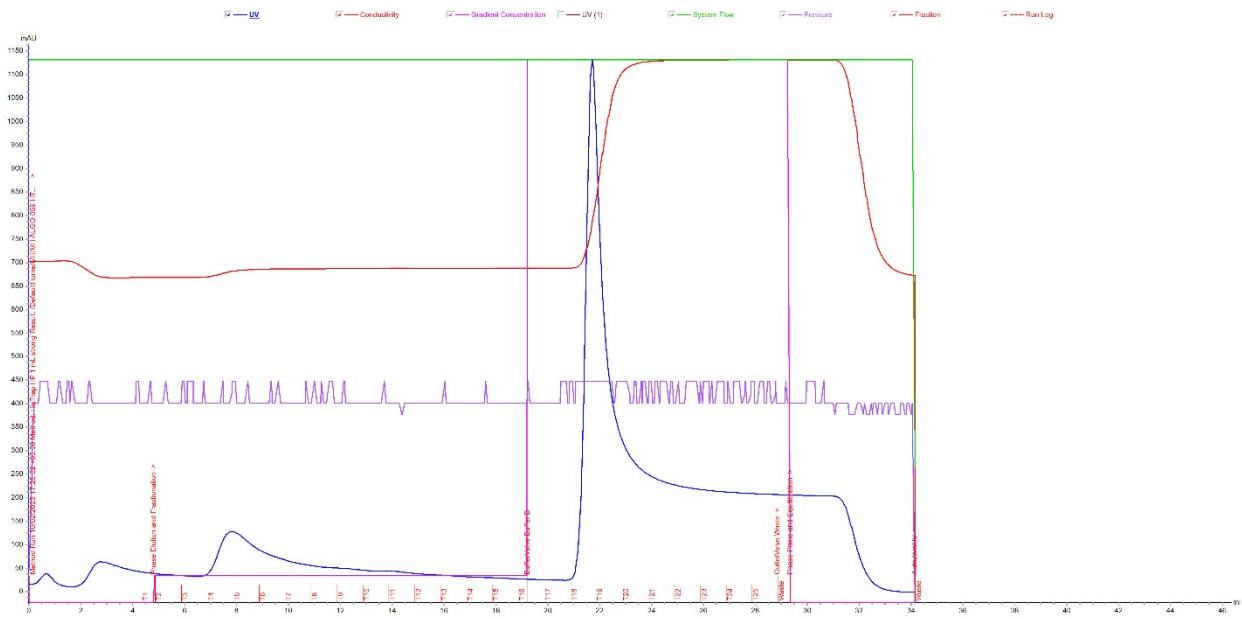

Fig. S8 A<sub>280</sub> chromatogram of ALGO-059 purification by Ni<sup>2+</sup>-affinity chromatography.

159

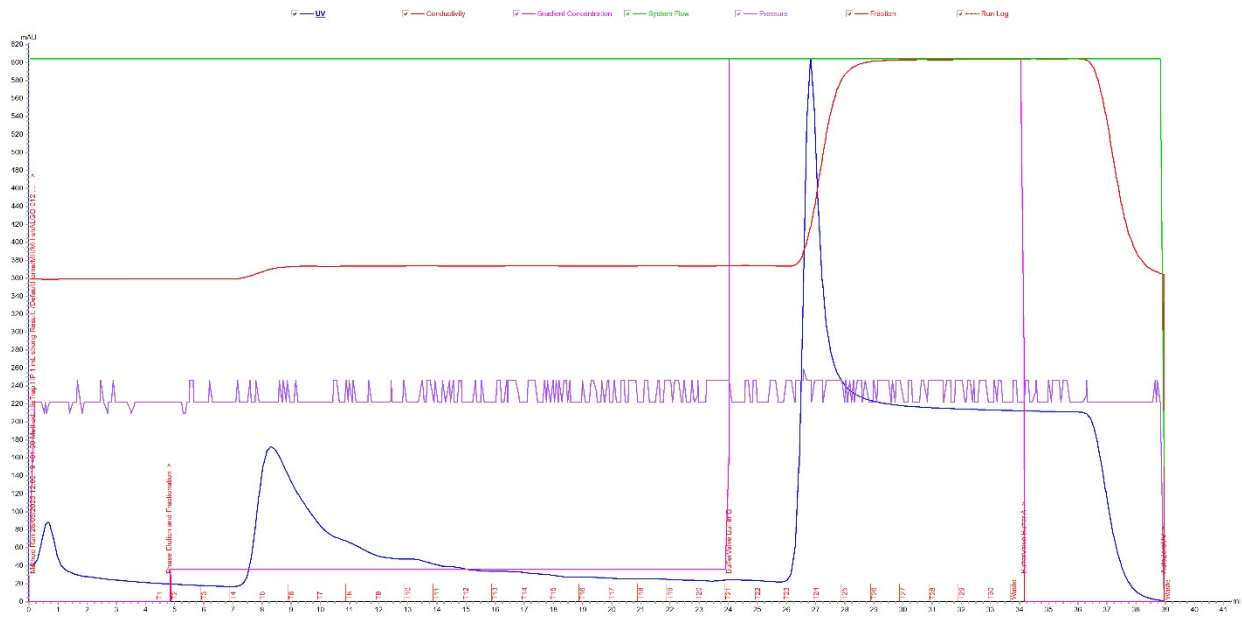

Fig. S9 A<sub>280</sub> chromatogram of chALGO-012 purification by Ni<sup>2+</sup>-affinity chromatography.

160  
161  
162

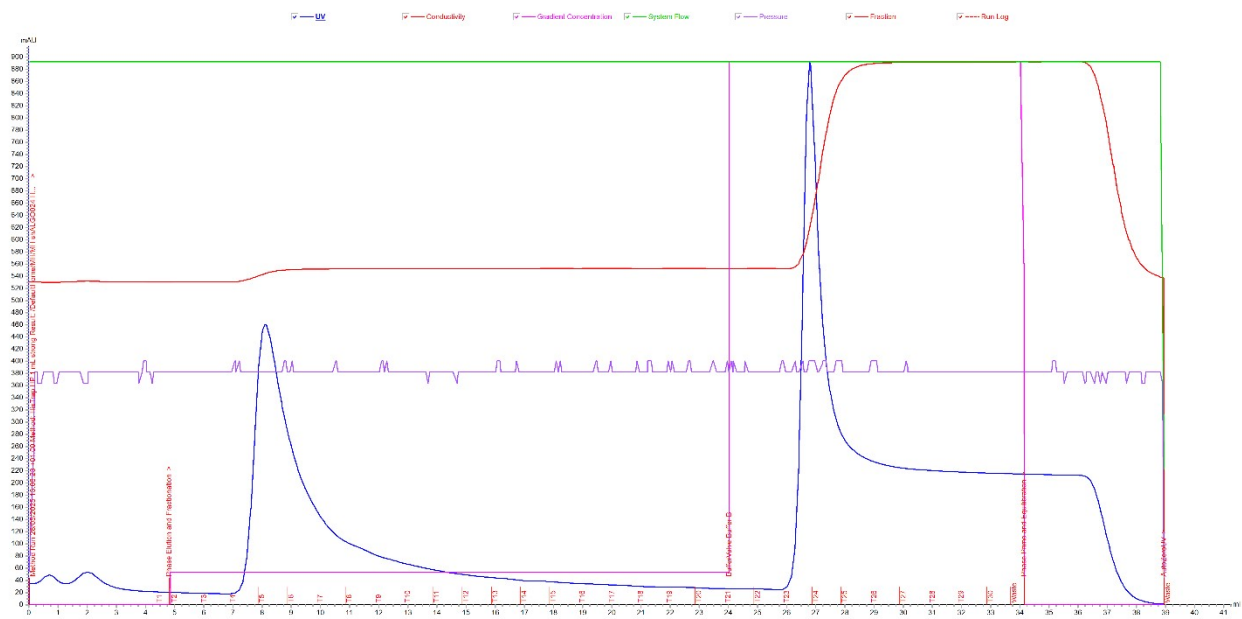

Fig. S10 A<sub>280</sub> chromatogram of chALGO-024 purification by Ni<sup>2+</sup>-affinity chromatography.

163  
164

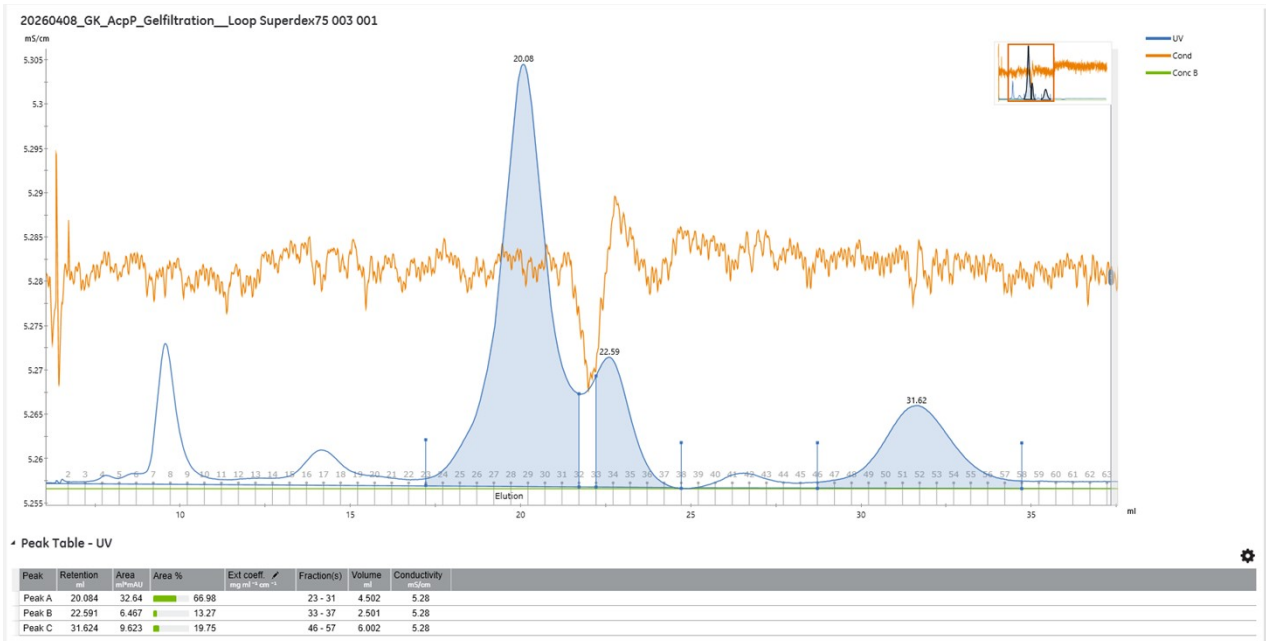

Fig. S11 A<sub>280</sub> chromatogram of purified C<sub>12</sub>-EcAcpP using Superdex S75 SEC (20.08 mL).

165

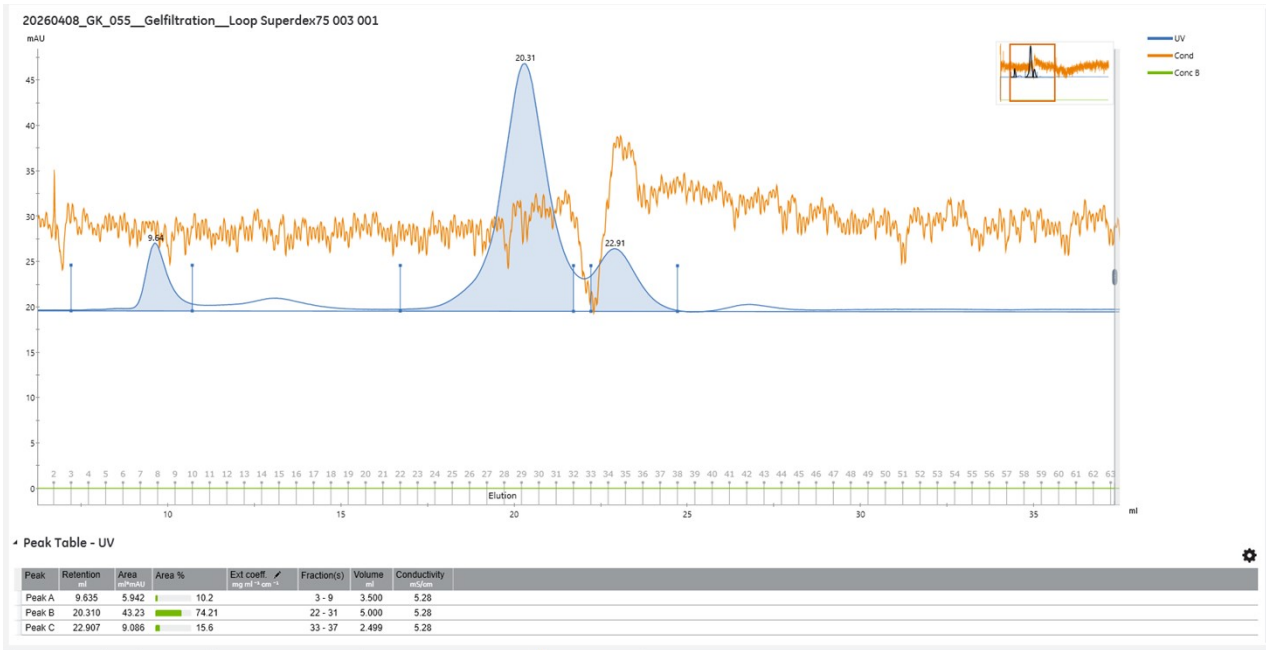

Fig. S12 A<sub>280</sub> chromatogram of purified C<sub>12</sub>-ALGO-055 using Superdex S75 SEC (20.31 mL).

166

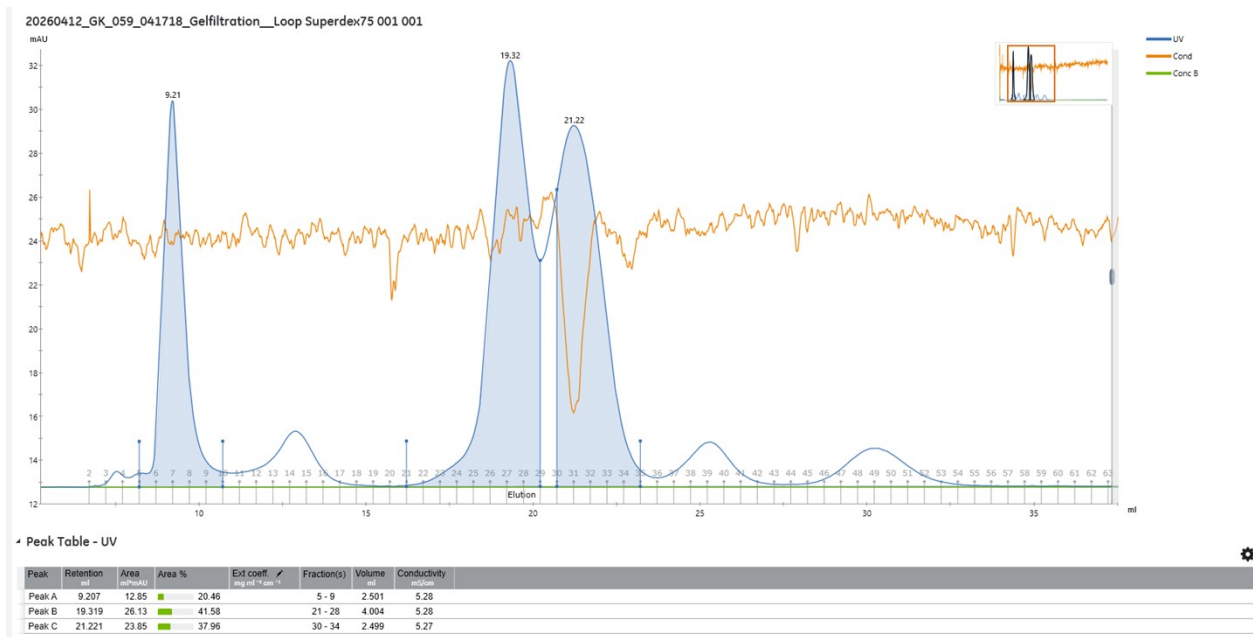

**Fig. S13**  $A_{280}$  chromatogram of purified C<sub>12</sub>-ALGO-059 using Superdex S75 SEC (19.32 mL).

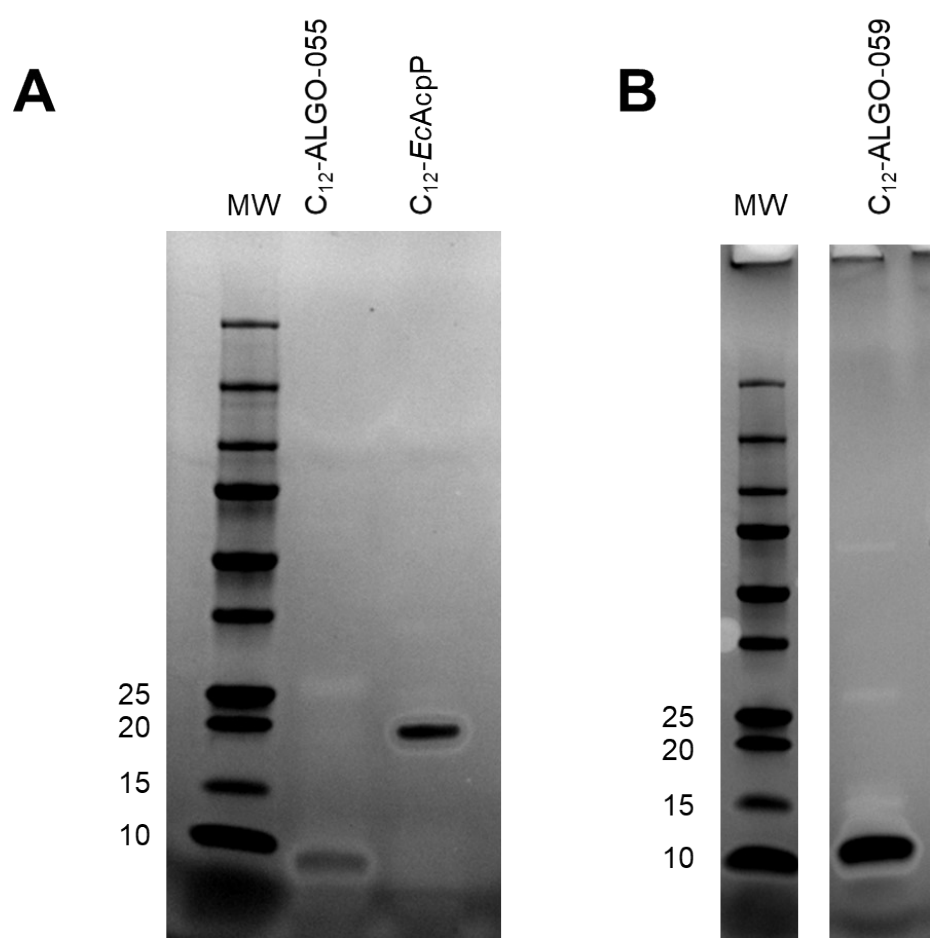

**Fig. S14** SDS-PAGE of purified acylated proteins (A) C<sub>12</sub>-EcAcpP and C<sub>12</sub>-ALGO-055 (B) C<sub>12</sub>-ALGO-059. Gels were imaged using a FluorChem M FM1059.

169 LC/ESI-MS data (Figs. S15-S37)

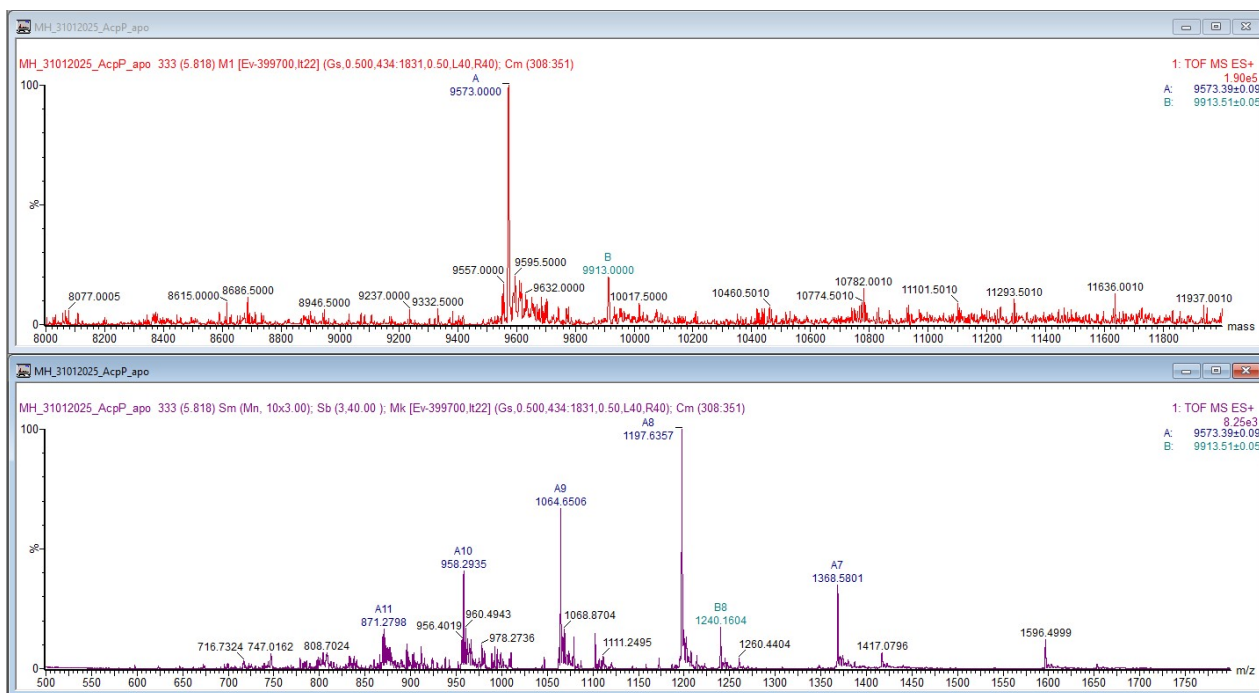

Fig. S15 apo-EcAcpP charge envelope (purple) and deconvoluted mass (red).

170

171

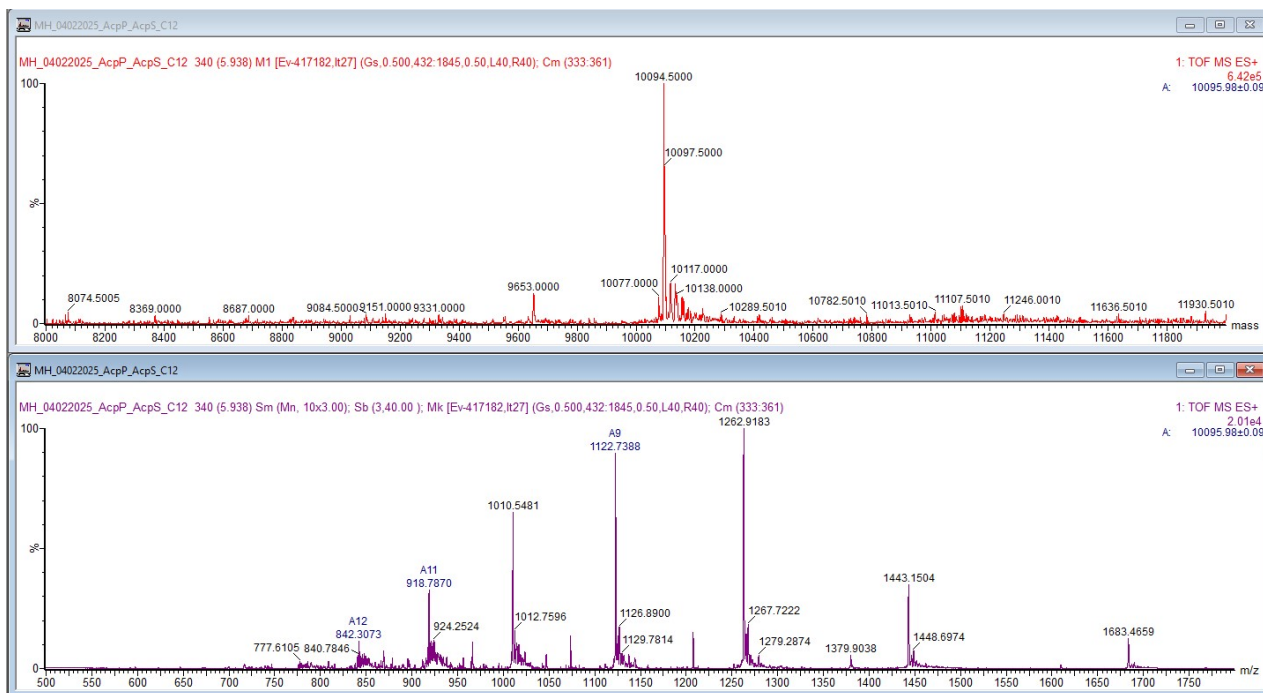

Fig. S16 holo-EcAcpP charge envelope (purple) and deconvoluted mass (red).

172

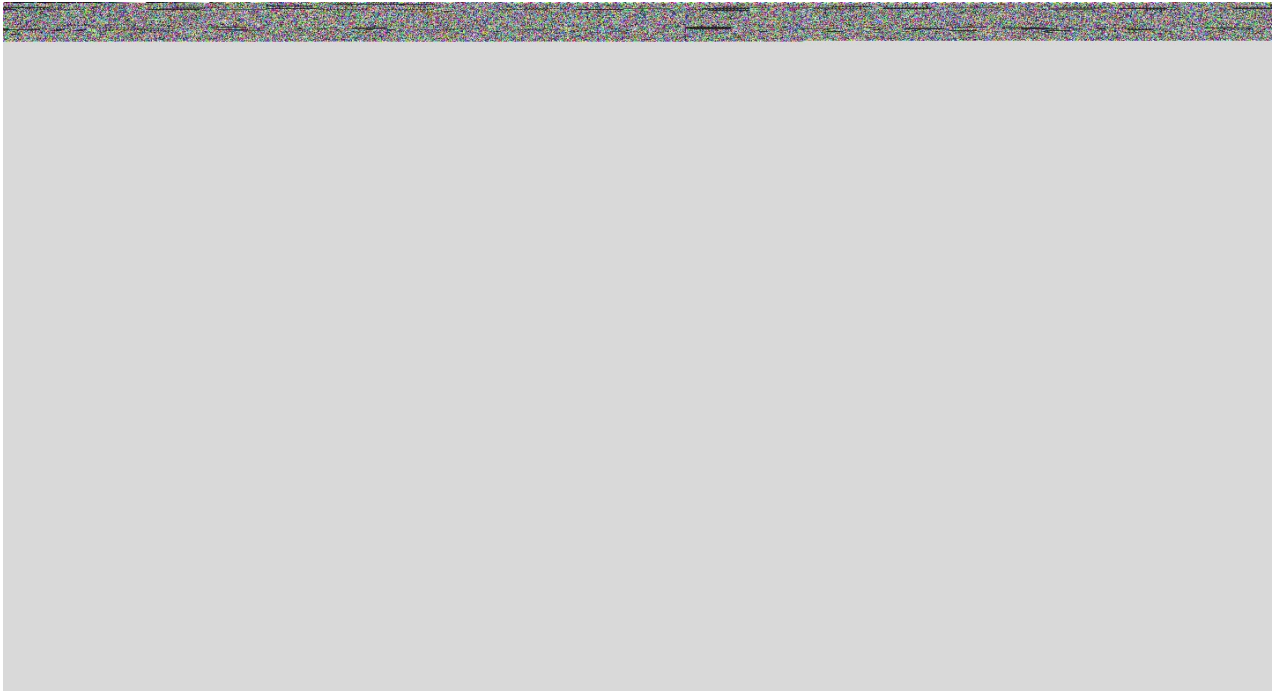

Fig. S17 C<sub>12</sub>-EcAcpP charge envelope (purple) and deconvoluted mass (red).

173

174

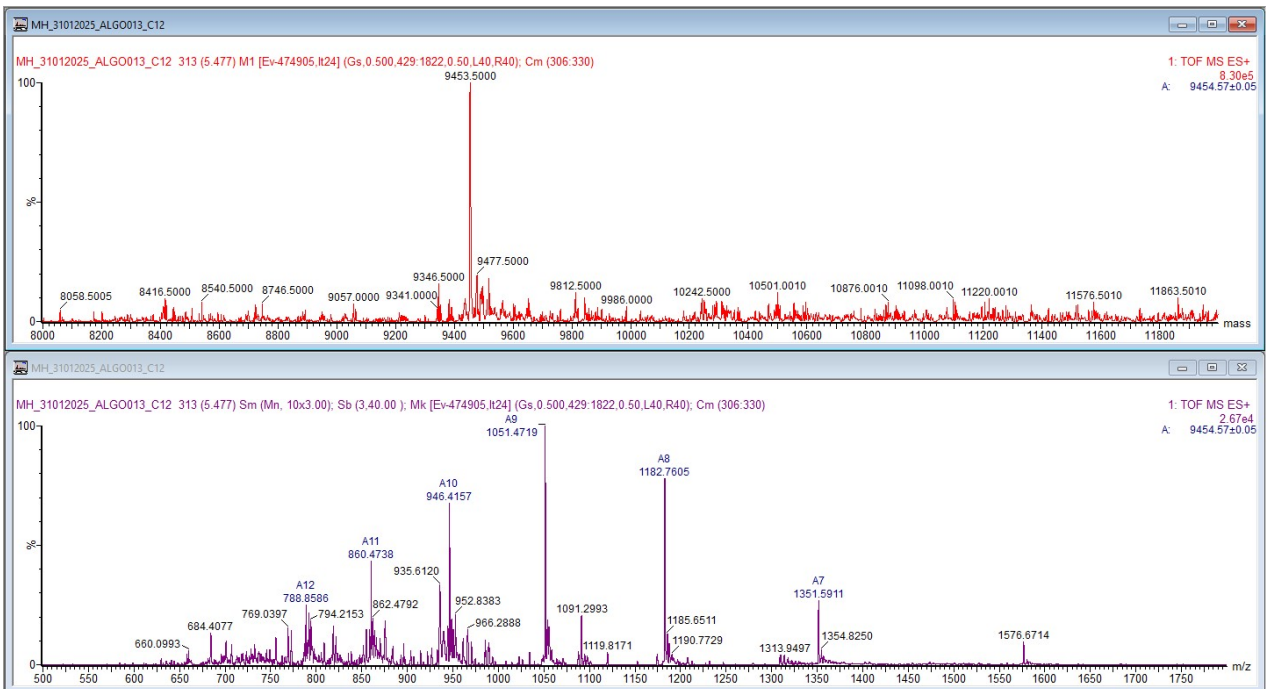

Fig. S18 apo-ALGO-013 charge envelope (purple) and deconvoluted mass (red).

175

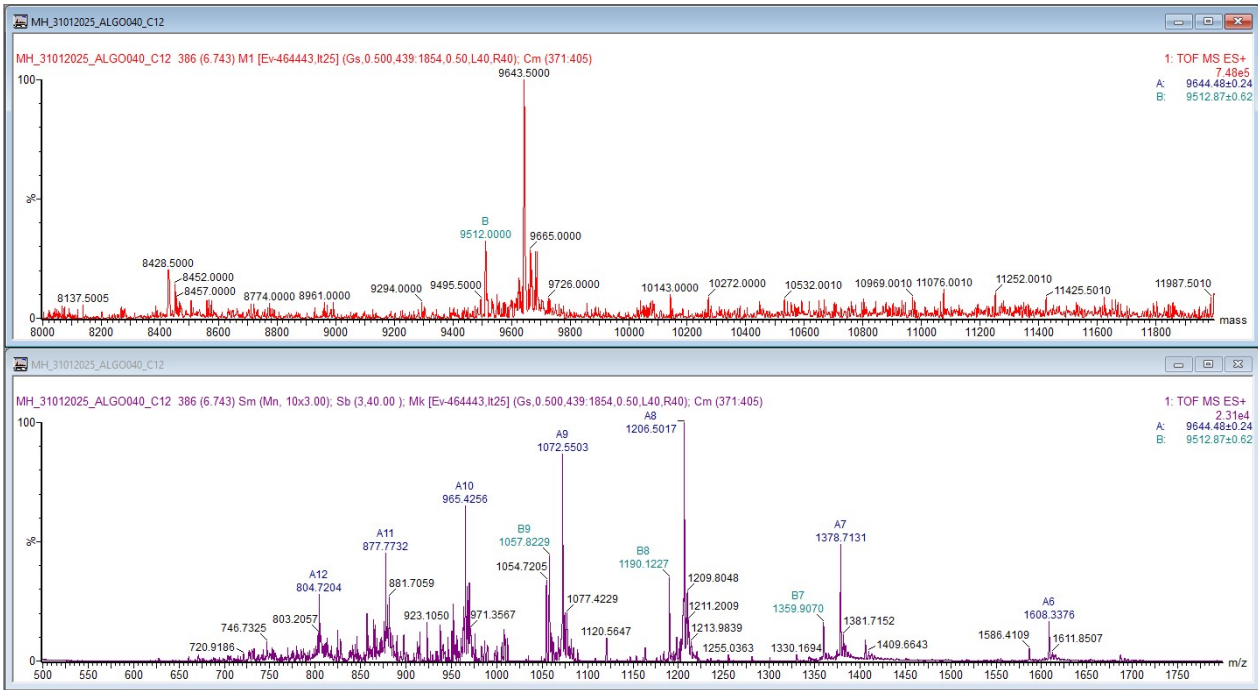

Fig. S19 apo-ALGO-040 charge envelope (purple) and deconvoluted mass (red).

176

177

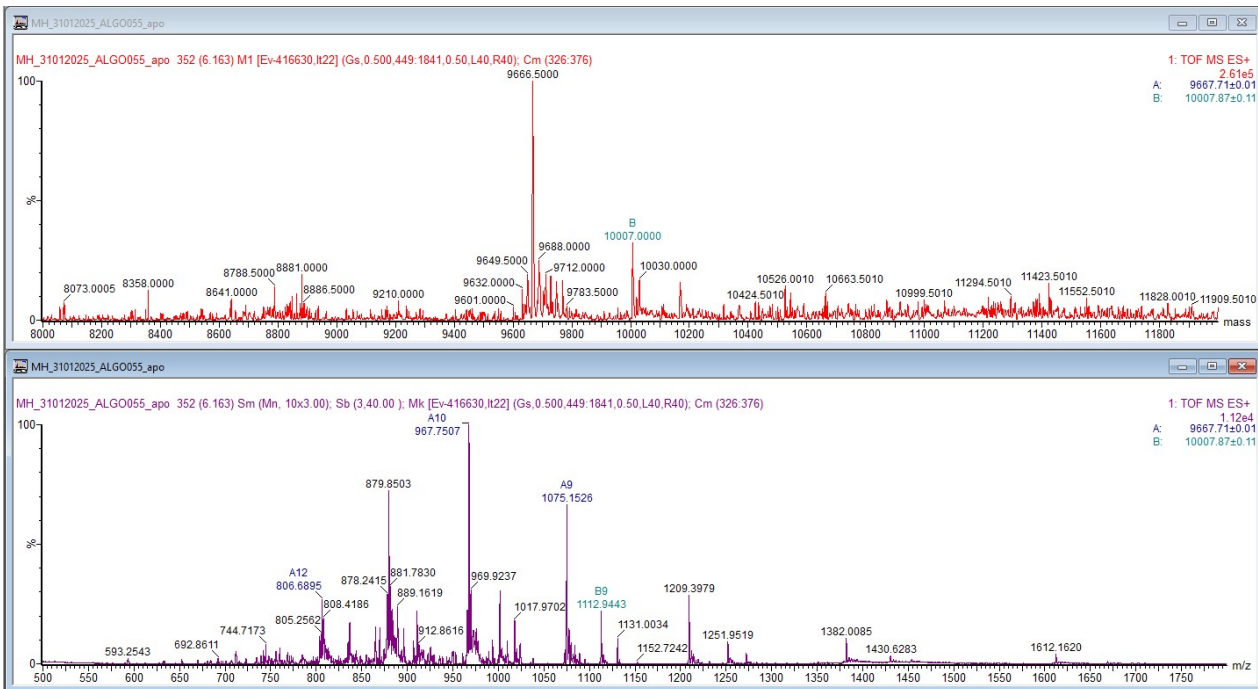

Fig. S20 apo-ALGO-055 charge envelope (purple) and deconvoluted mass (red).

178

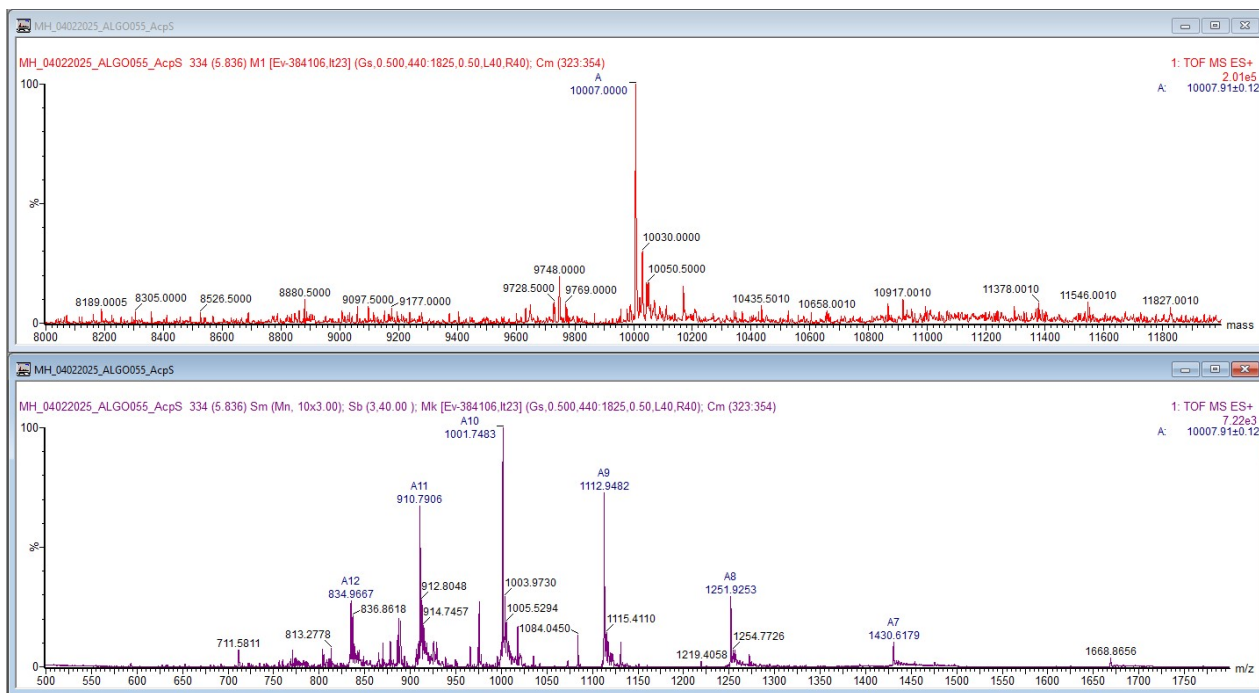

Fig. S21 *holo*-ALGO-055 charge envelope (purple) and deconvoluted mass (red).

179

180

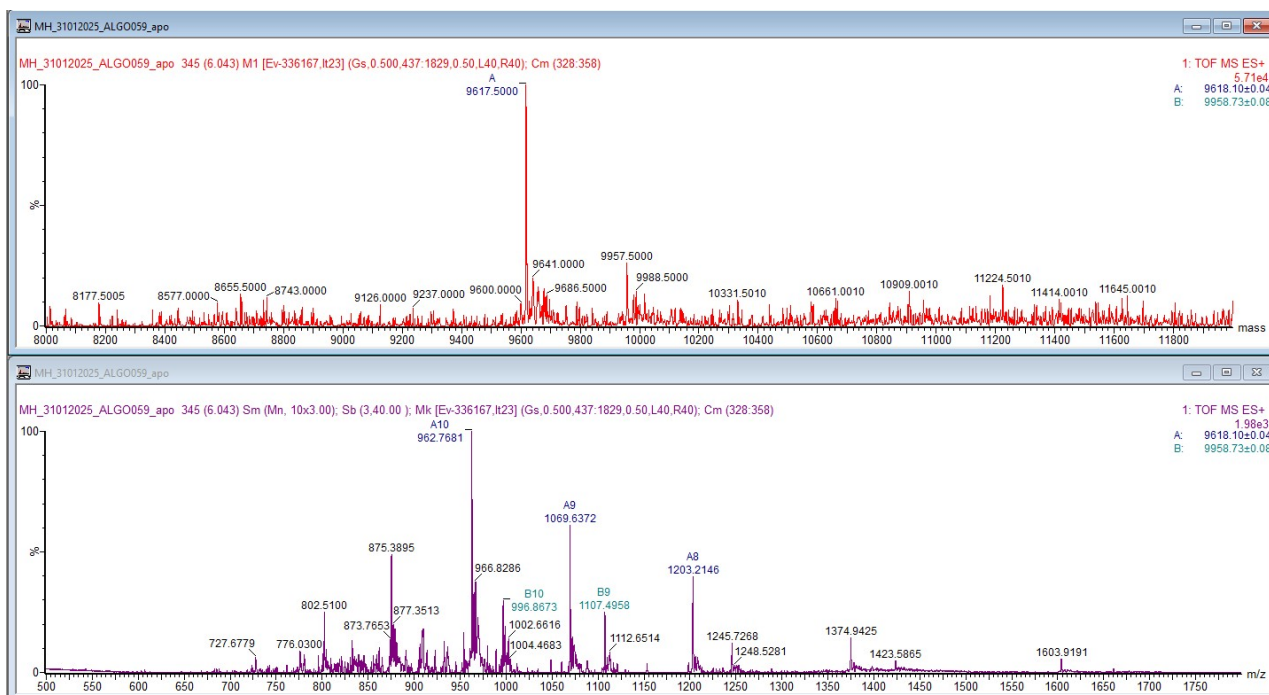

Fig. S22 *apo*-ALGO-059 charge envelope (purple) and deconvoluted mass (red).

181

182

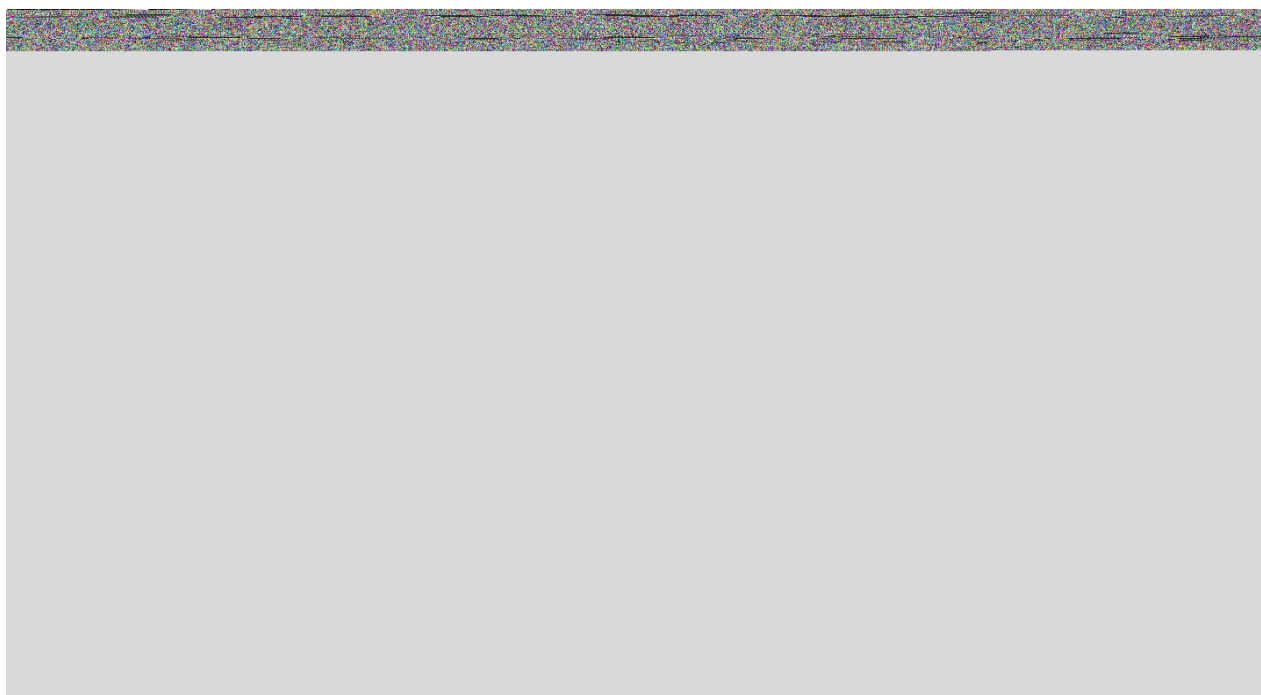

Fig. S23 *holo*-ALGO-059 charge envelope (purple) and deconvoluted mass (red).

183

184

185

186

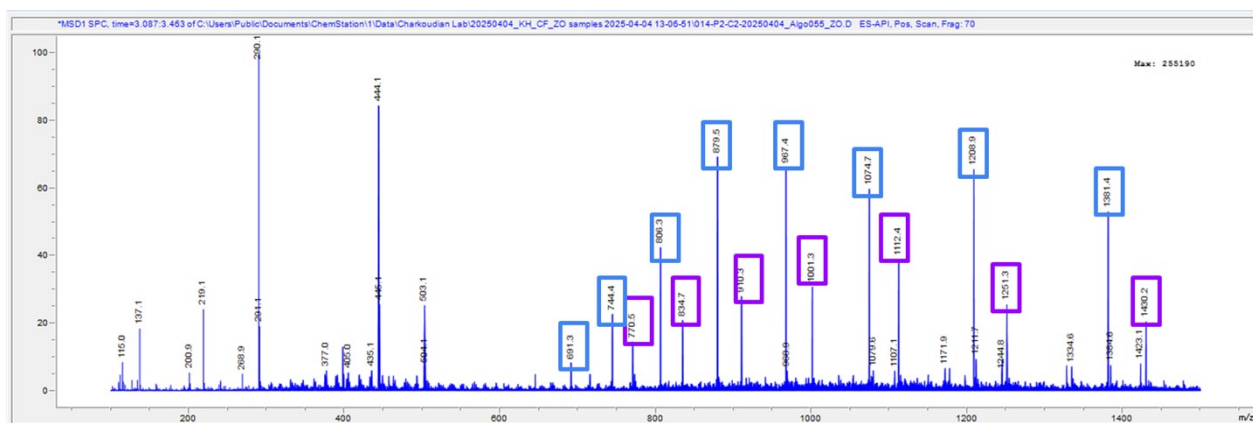

[apo-ALGO-055](#)

[holo-ALGO-055](#)

Fig. S24 Attempted apo→holo conversion of immobilised ALGO-055 using *EcAcpS*. Recorded using an Agilent Technologies InfinityLab G6125B single quadrupole MS.

187

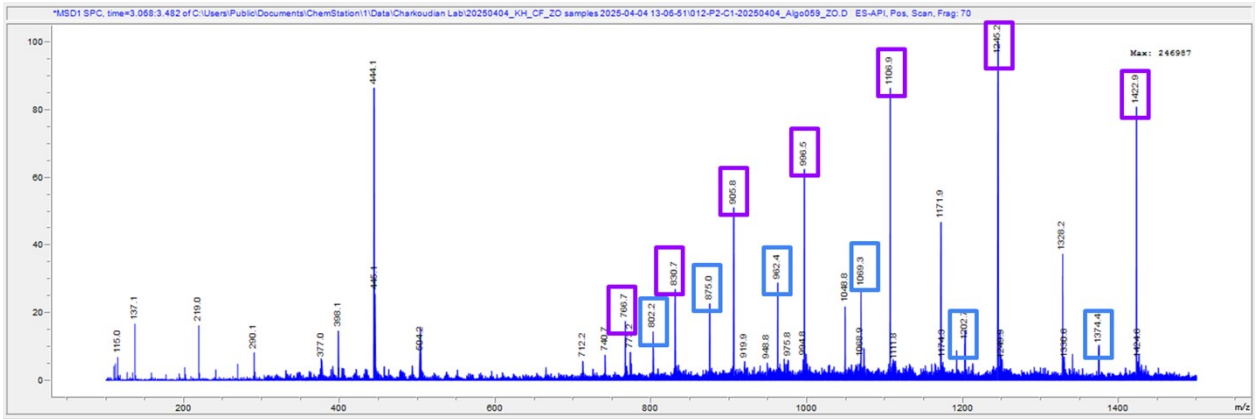

[apo-ALGO-059](#)

[holo-ALGO-059](#)

**Fig. S25** Attempted apo→holo conversion of immobilised ALGO-059 using *EcAcpS*. Recorded using an Agilent Technologies InfinityLab G6125B single quadrupole MS.

188

189

190

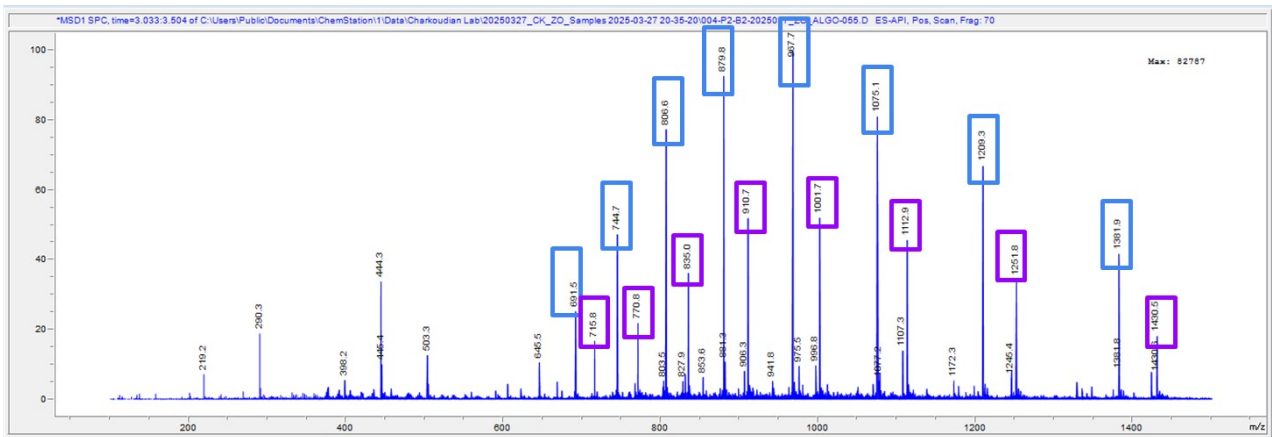

[apo-ALGO-055](#)

[holo-ALGO-055](#)

**Fig. S26** Attempted apo→holo conversion of ALGO-055 using *BsSfp*. Recorded using an Agilent Technologies InfinityLab G6125B single quadrupole MS.

191

192

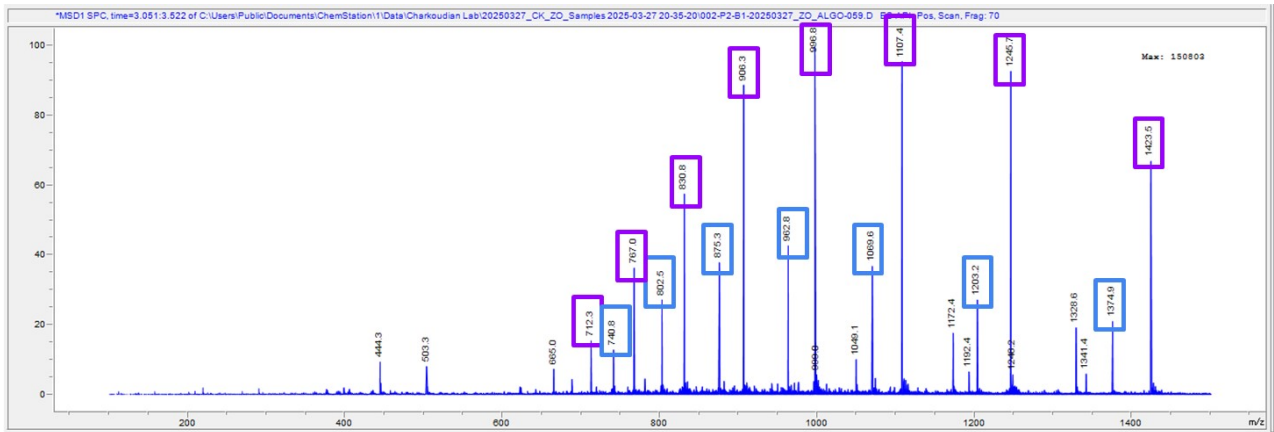

[apo-ALGO-059](#)

[holo-ALGO-059](#)

**Fig. S27** Attempted apo→holo conversion of ALGO-059 using *BsSfp*. Recorded using an Agilent Technologies InfinityLab G6125B single quadrupole MS.

193

194

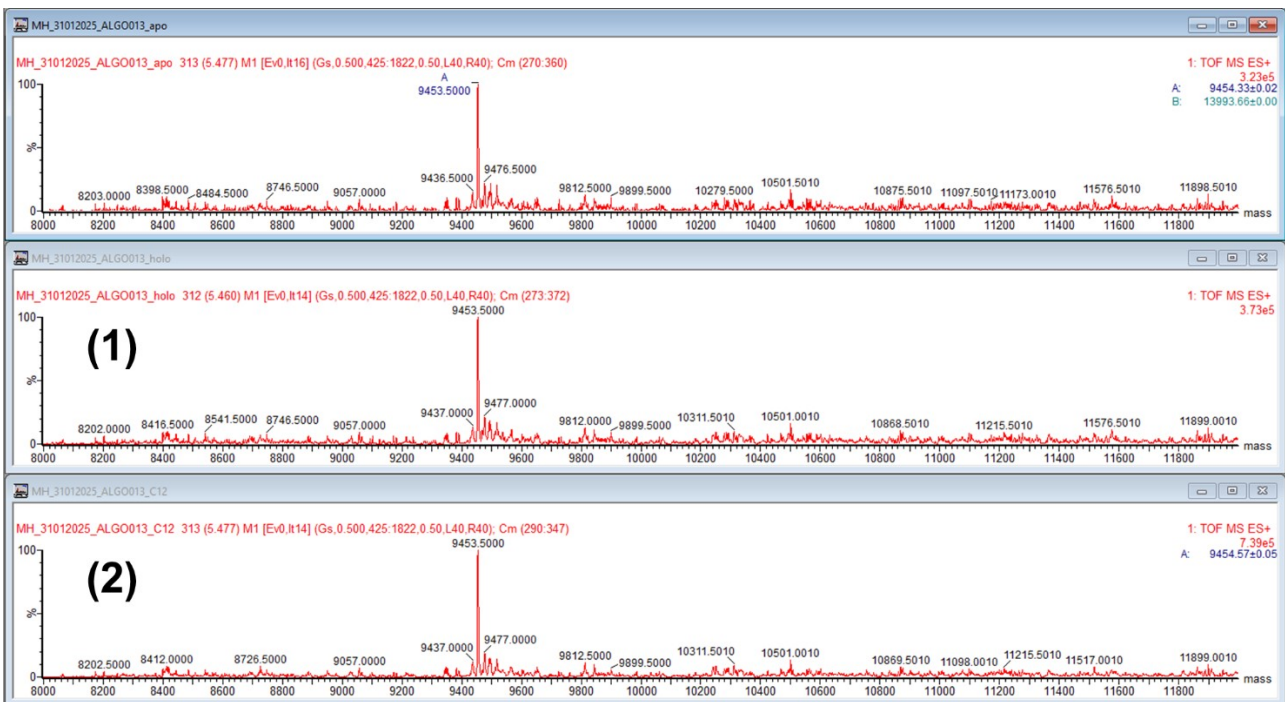

**Fig. S28** Unsuccessful apo→holo→acyl conversion of ALGO-013 using *EcAcpS* (1) and *VhAaS* (2).

195

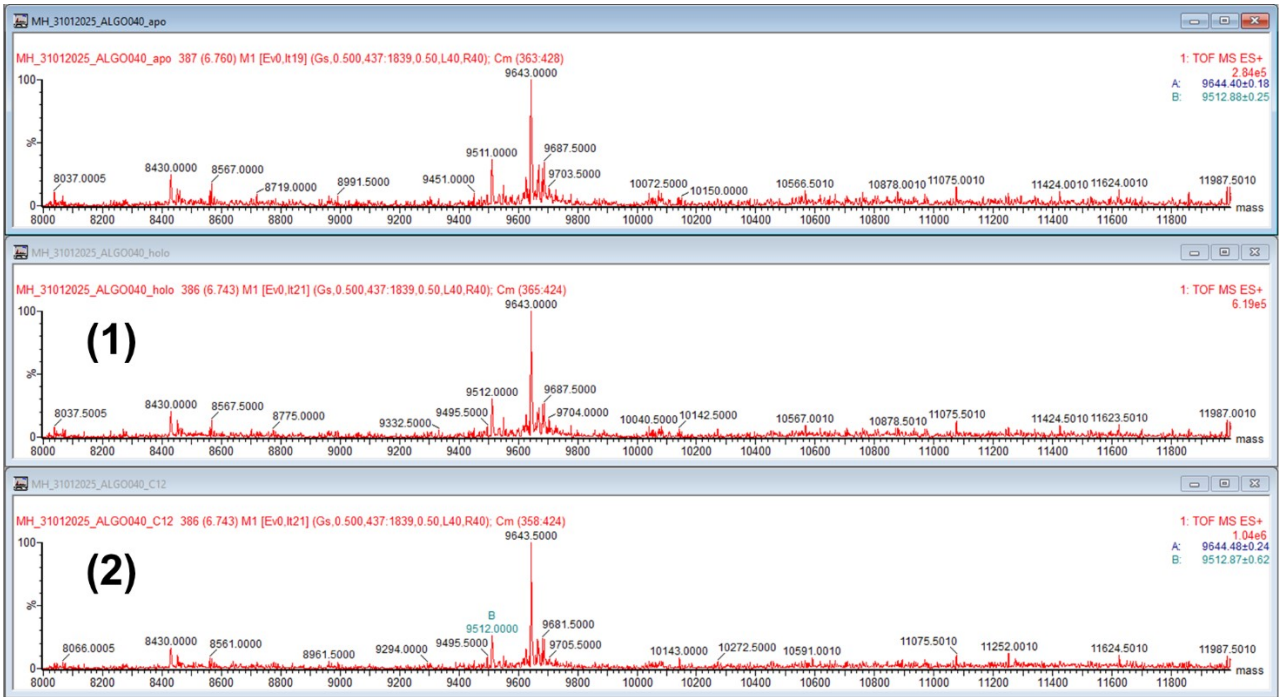

Fig. S29 Unsuccessful apo→holo→acyl conversion of ALGO-040 using *EcAcpS* (1) and *VhAaS* (2).

196

197

198

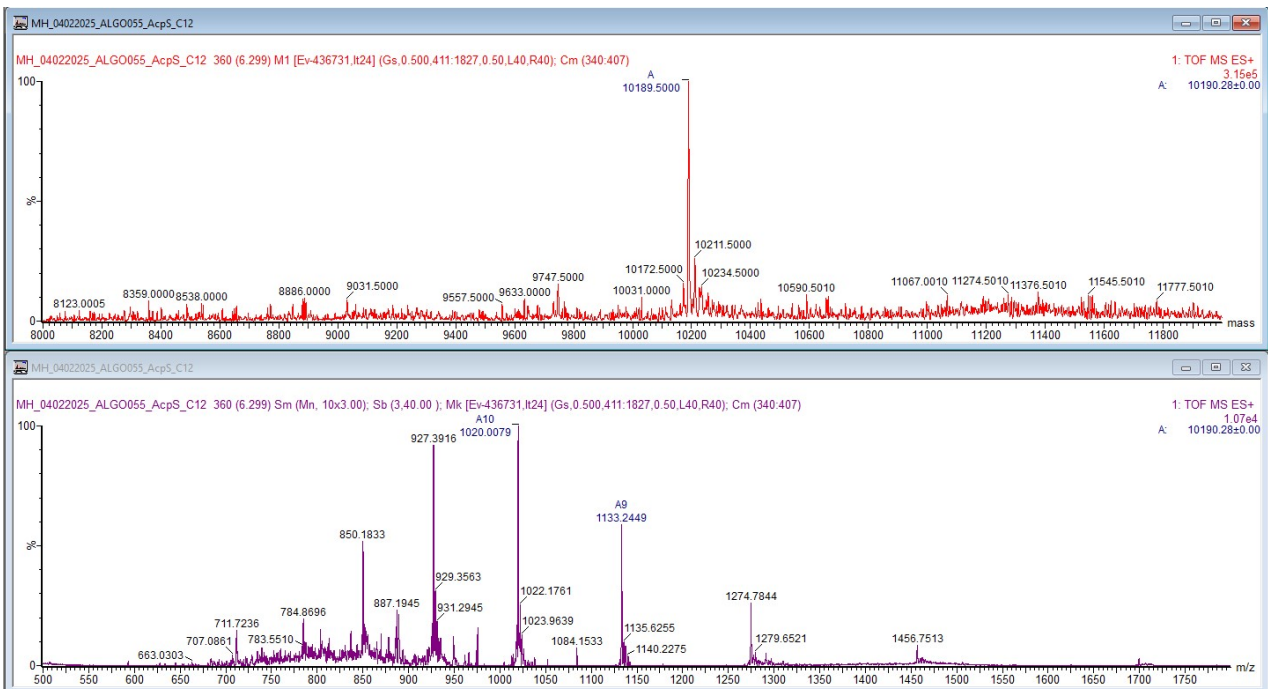

Fig. S30 C<sub>12</sub>-ALGO-055 charge envelope.

199

200

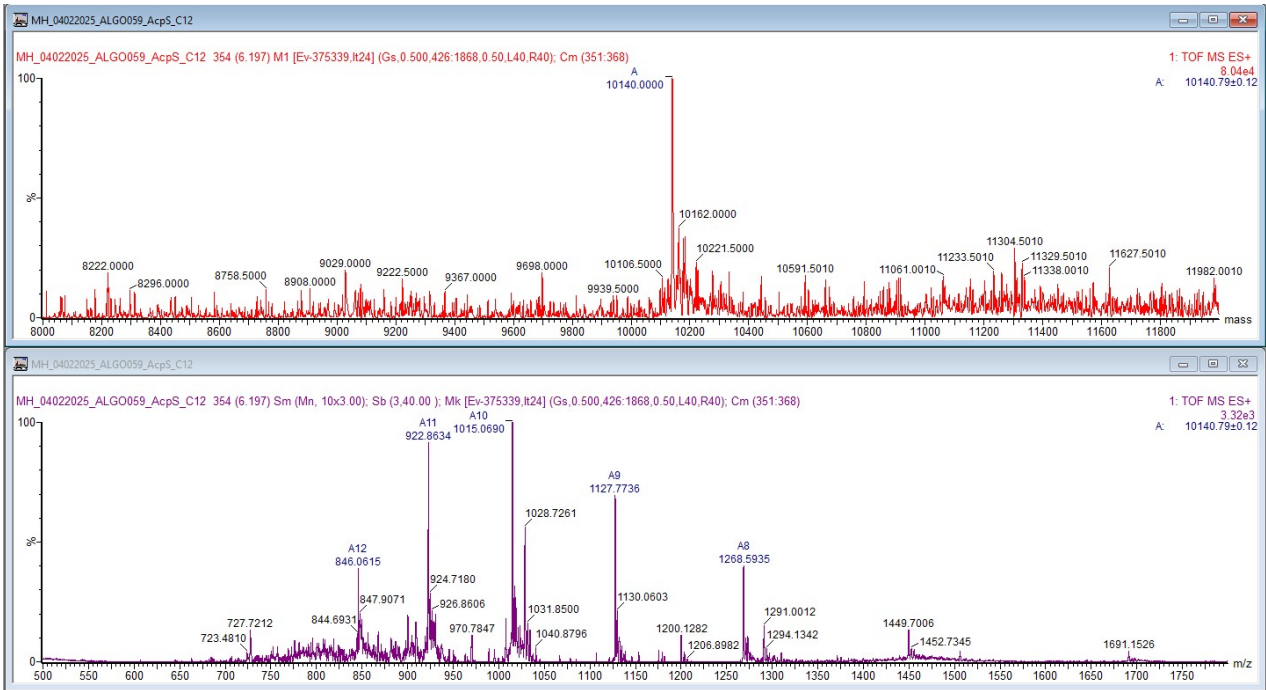

Fig. S31 C<sub>12</sub>-ALGO-059 charge envelope.

201

202

203

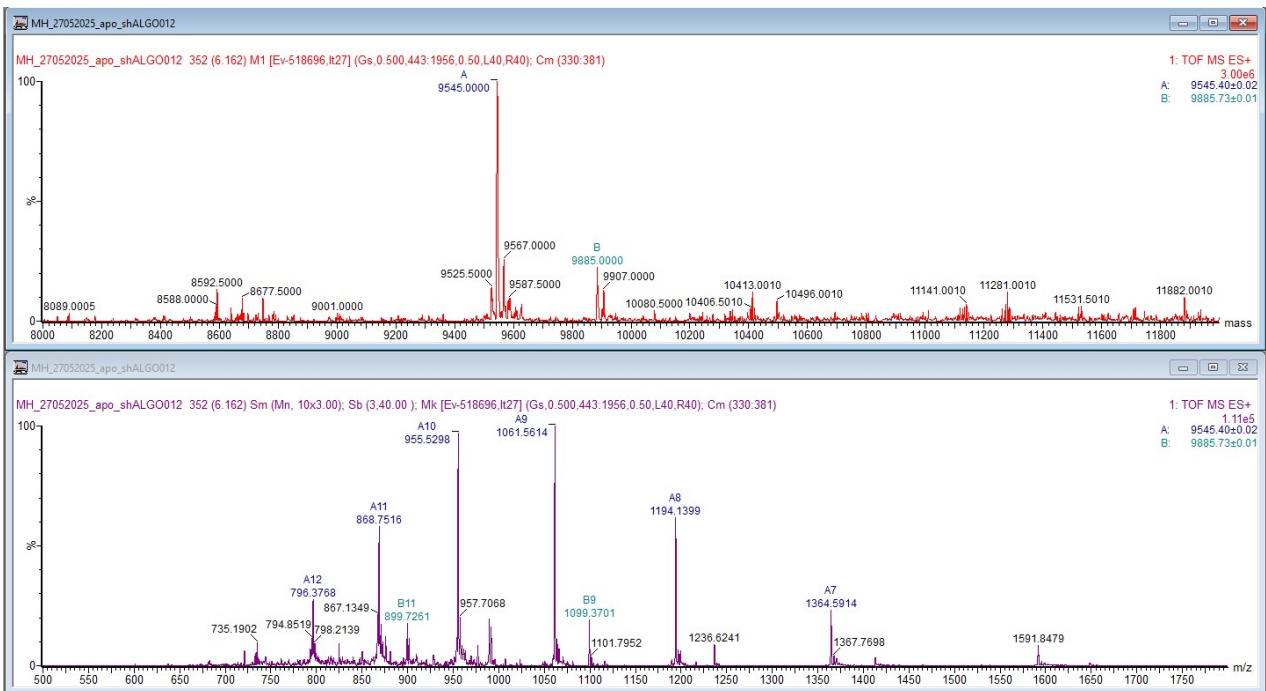

Fig. S32 apo-<sup>ch</sup>ALGO-012 charge envelope.

204

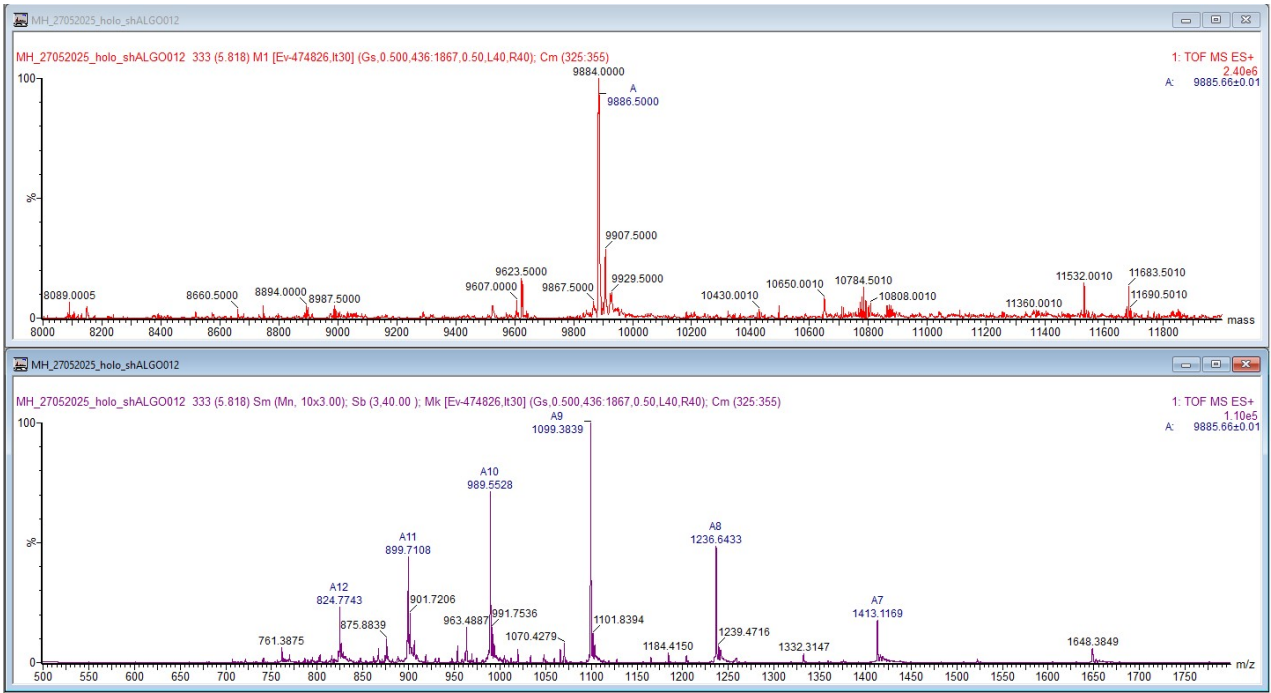

Fig. S33 holo-<sup>ch</sup>ALGO-012 charge envelope.

205

206

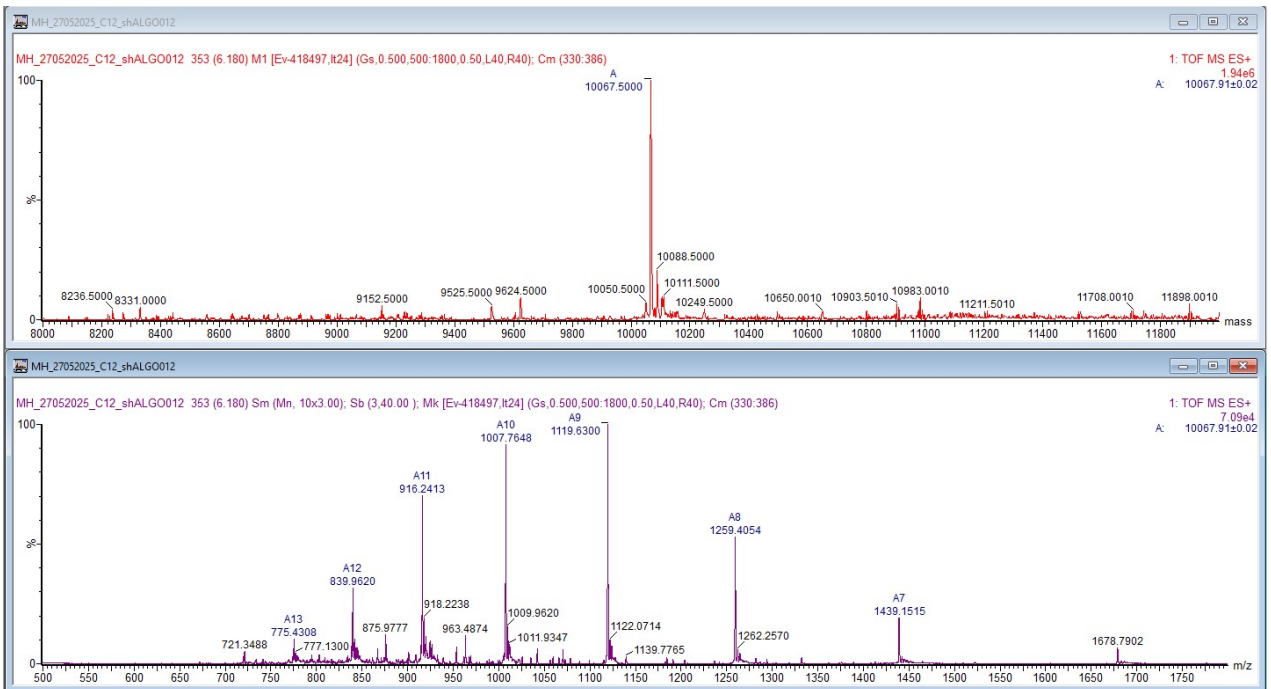

Fig. S34 C<sub>12</sub>-<sup>ch</sup>ALGO-012 charge envelope.

207

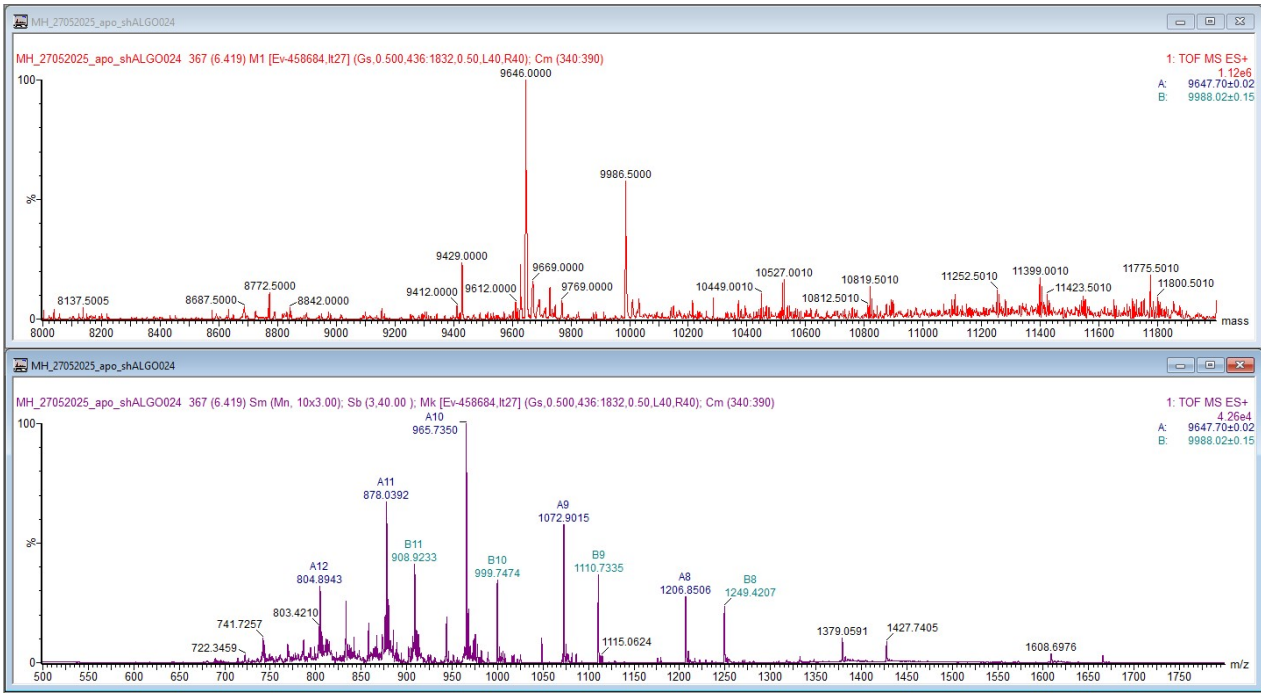

Fig. S35 apo-<sup>ch</sup>ALGO-024 charge envelope.

208

209

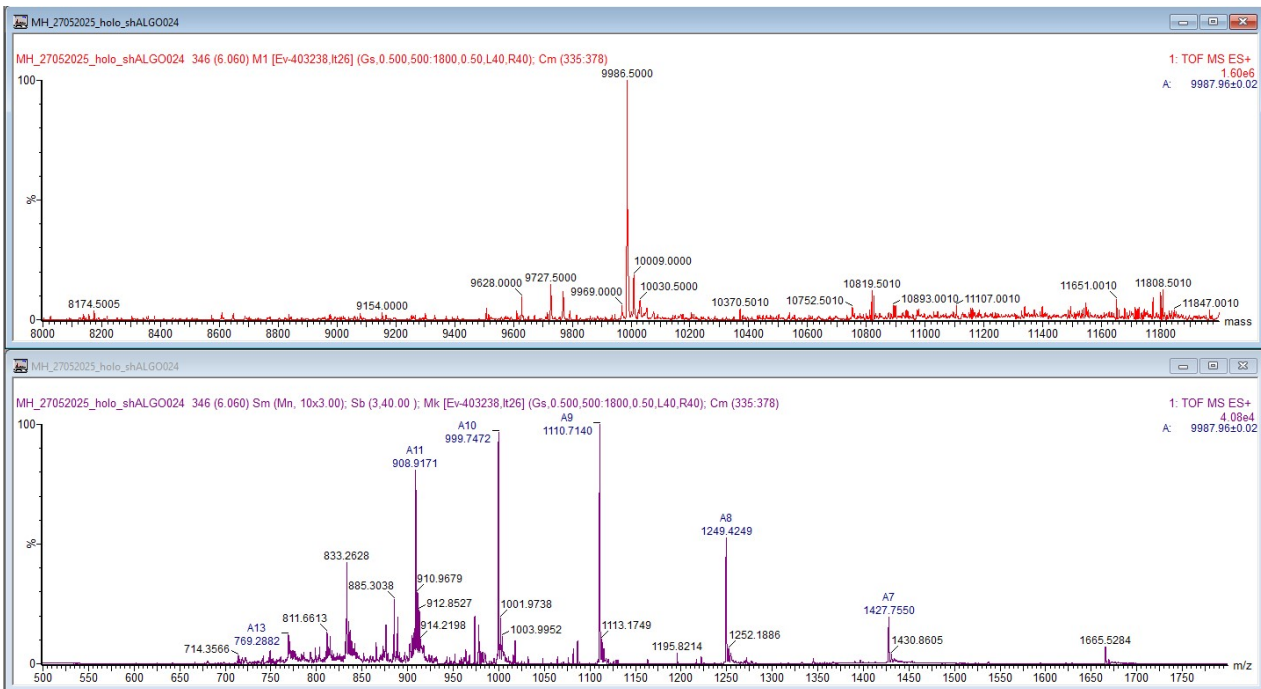

Fig. S36 holo-EcAcpP charge envelope.

210

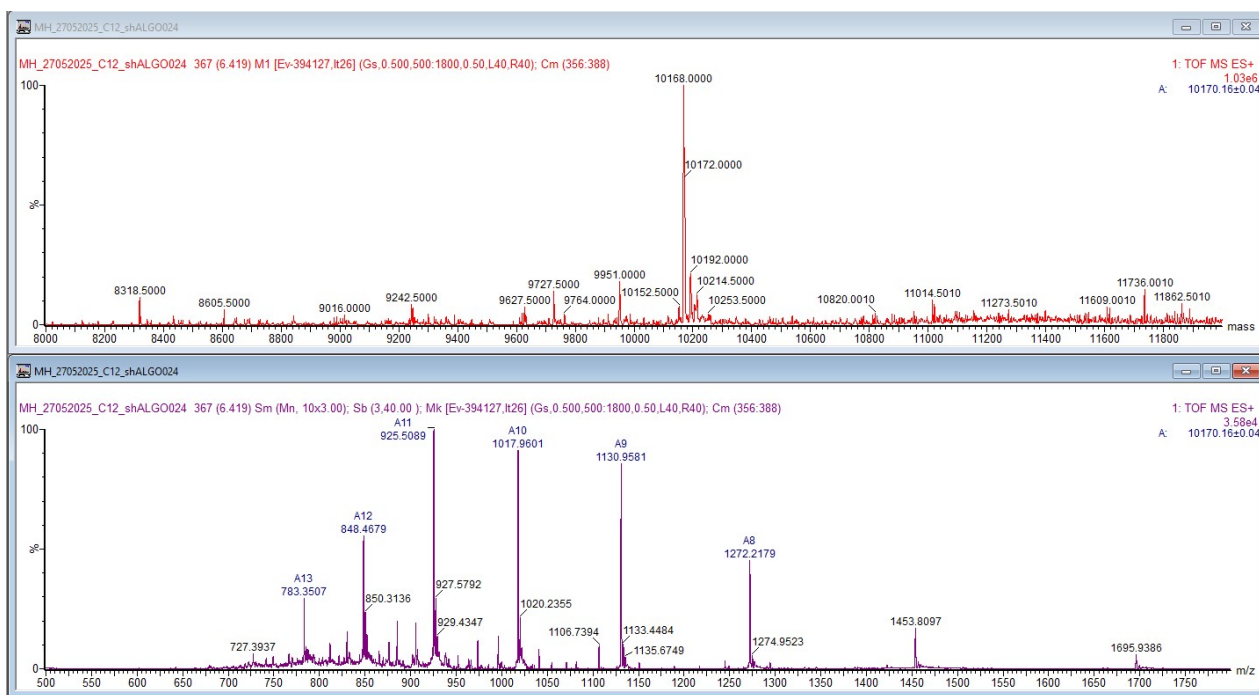

Fig. S37 C<sub>12</sub>-<sup>ch</sup>ALGO-024 charge envelope.

211

212

213 **Structural modelling and MDS (Figs. S38-S47)**

214

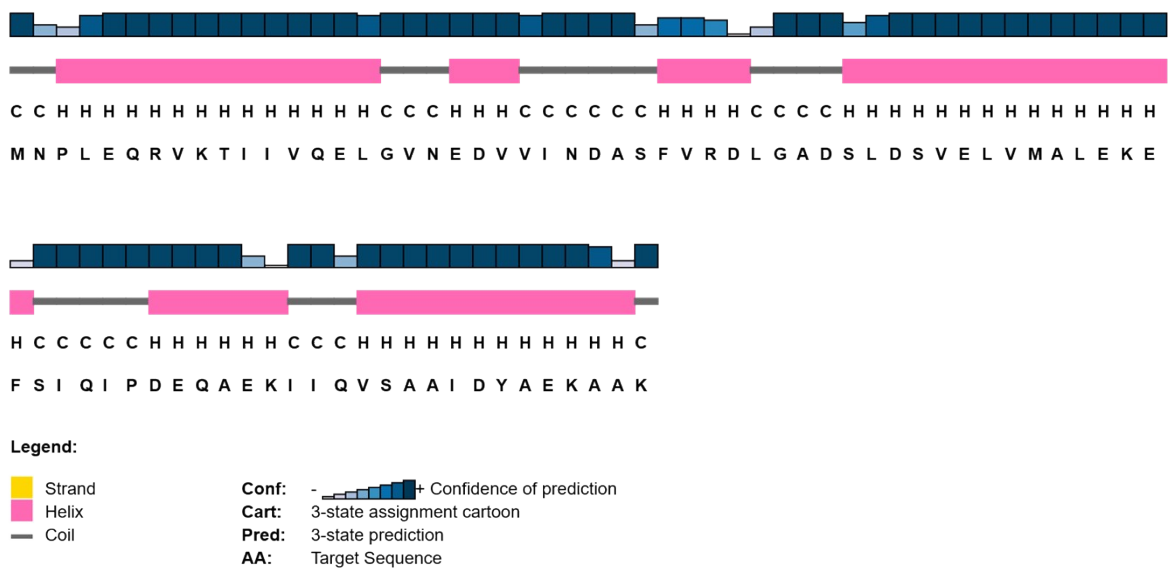

**Fig. S38** PSIPRED secondary structure prediction from ALGO-055 primary sequence.

215

216

217

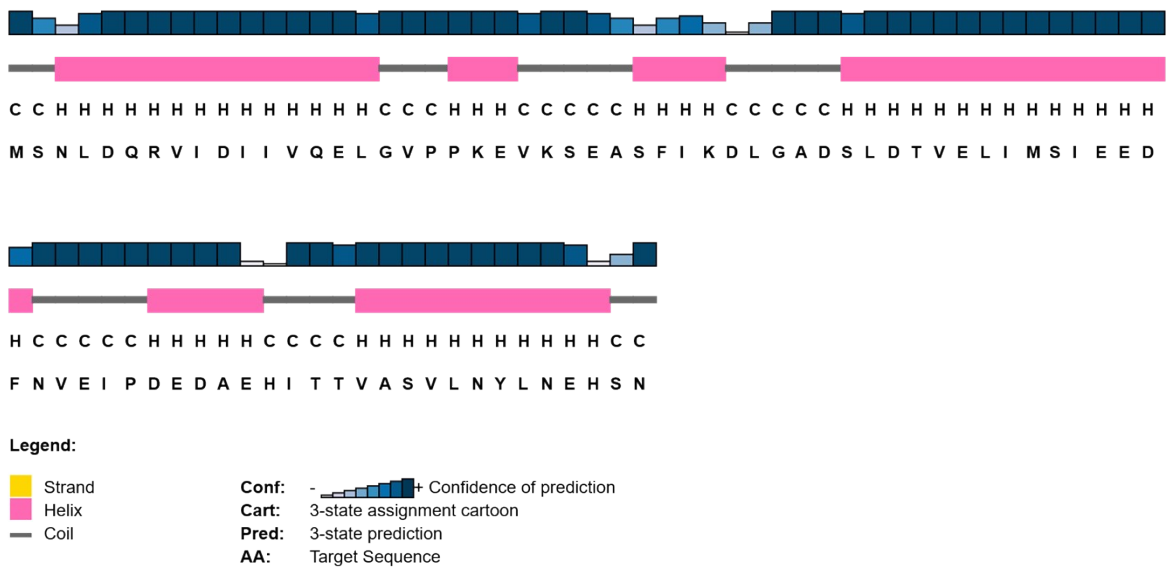

**Fig. S39** PSIPRED secondary structure prediction from ALGO-059 primary sequence.

218

219

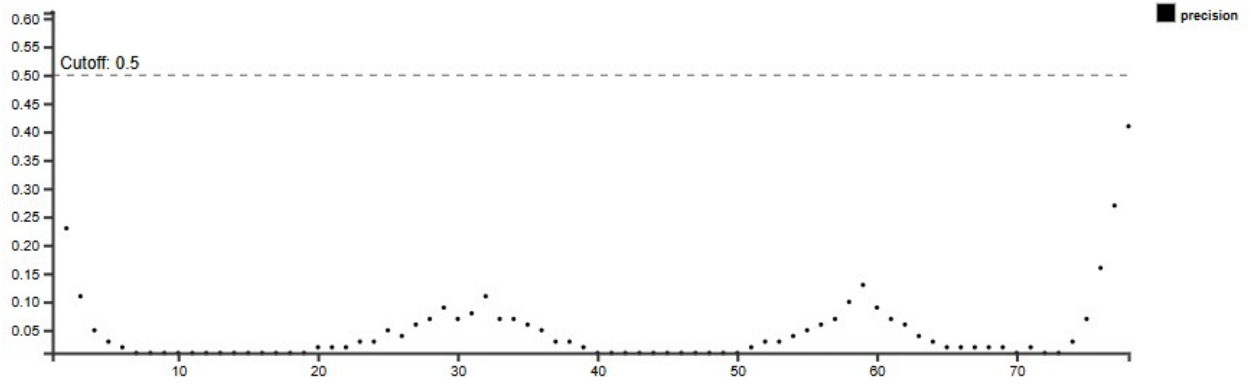

**Fig. S40** DISOPRED3 disorder prediction from ALGO-059 primary sequence. Cut-off for protein disorder classification = 0.5.

220

221

222

223

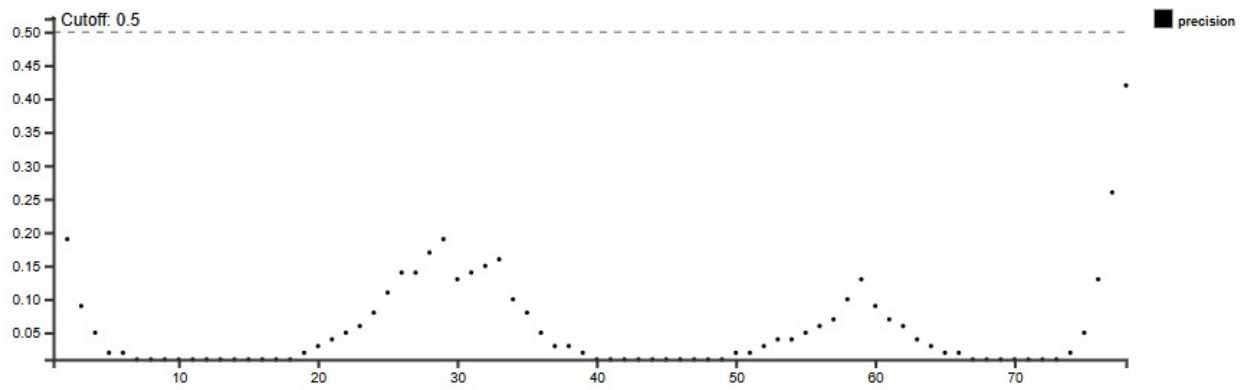

**Fig. S41** DISOPRED3 disorder prediction from ALGO-059 primary sequence. Cut-off for protein disorder classification = 0.5.

224

225

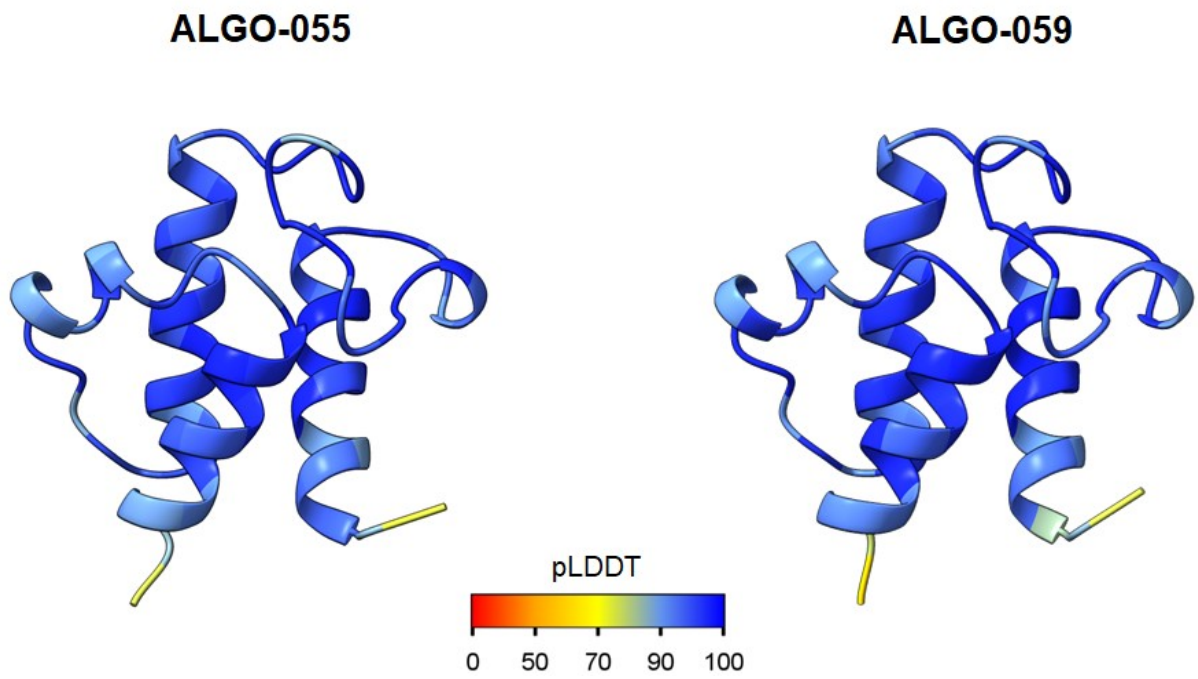

**Fig. S42** AlphaFold3 predicted structural models of ALGO-055 and ALGO-059.

226

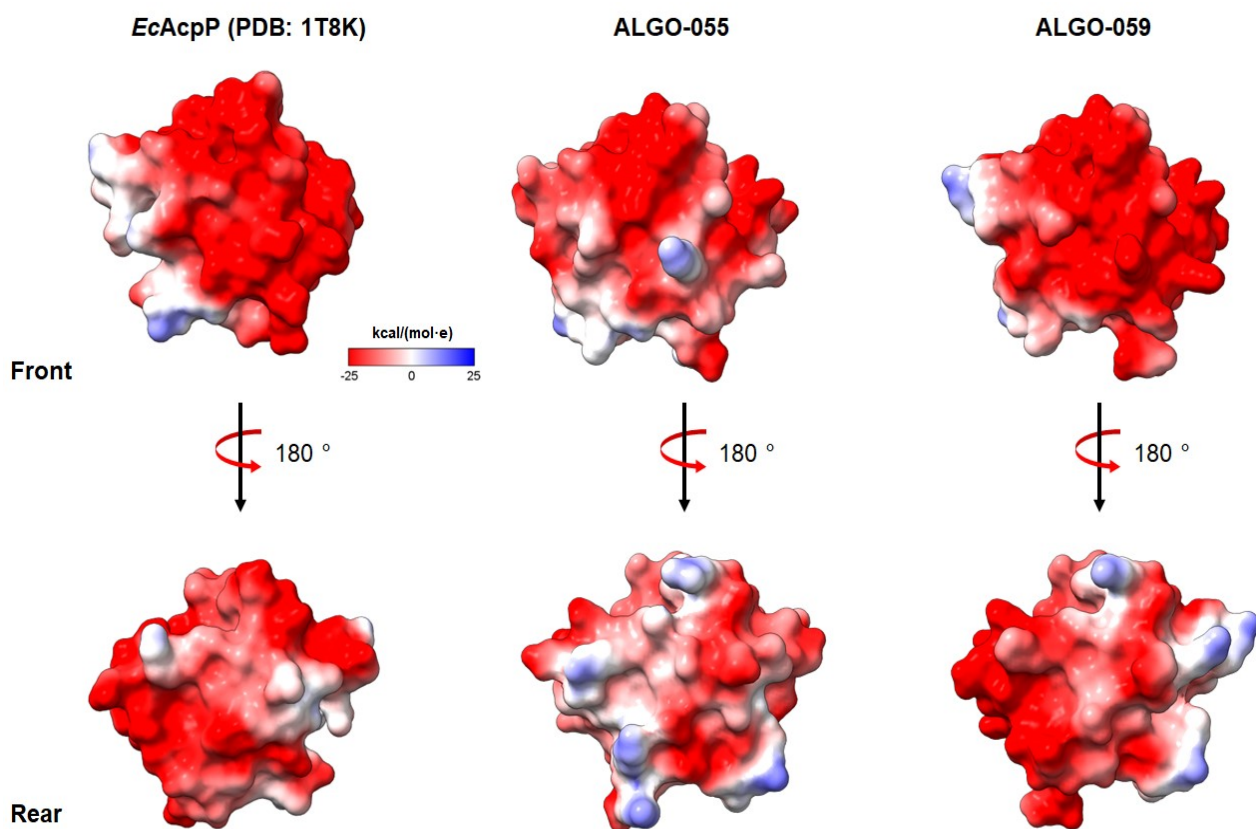

**Fig. S43** Coulombic potential maps of *EcAcpP*, alongside AlphaFold3 models of ALGO-055 and ALGO059.

227

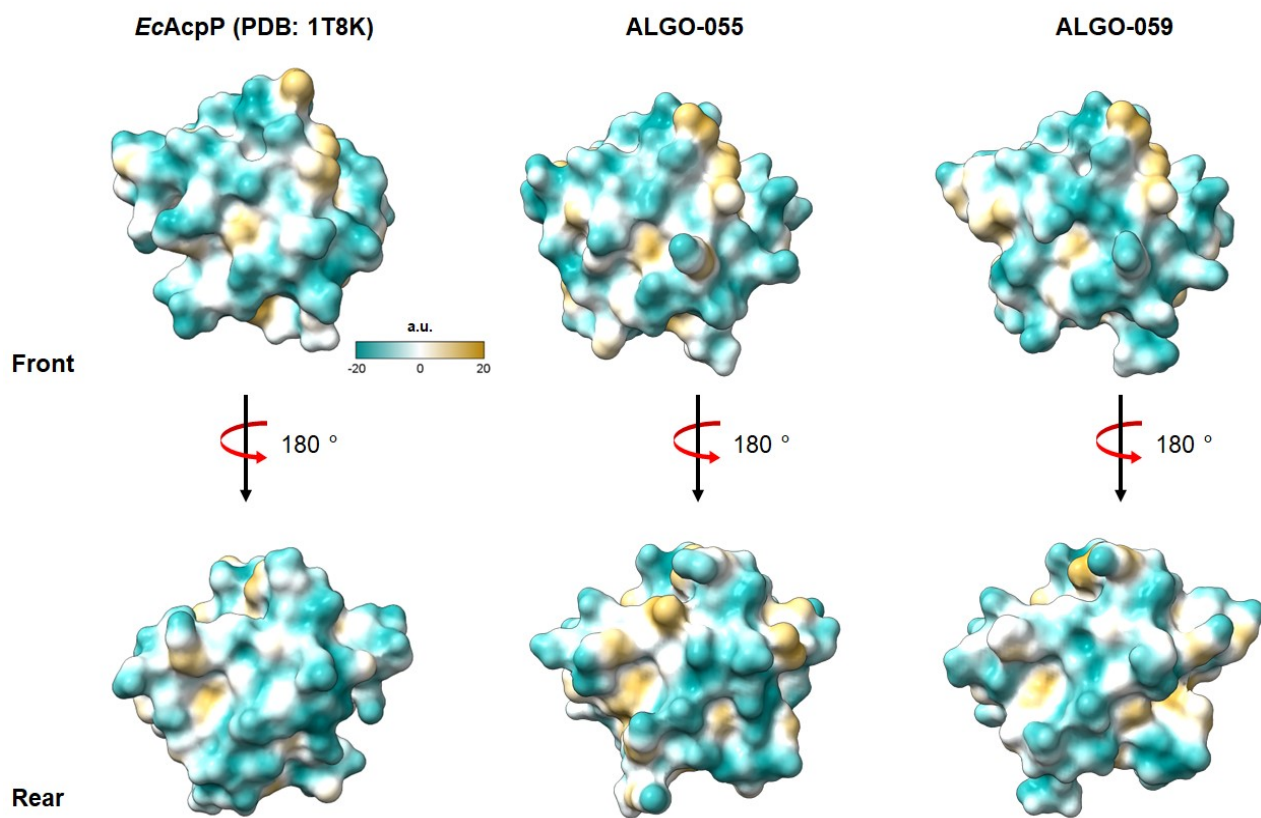

**Fig. S44** Molecular lipophilicity potential maps of *EcAcpP*, alongside AlphaFold3 models of ALGO-055 and ALGO059.

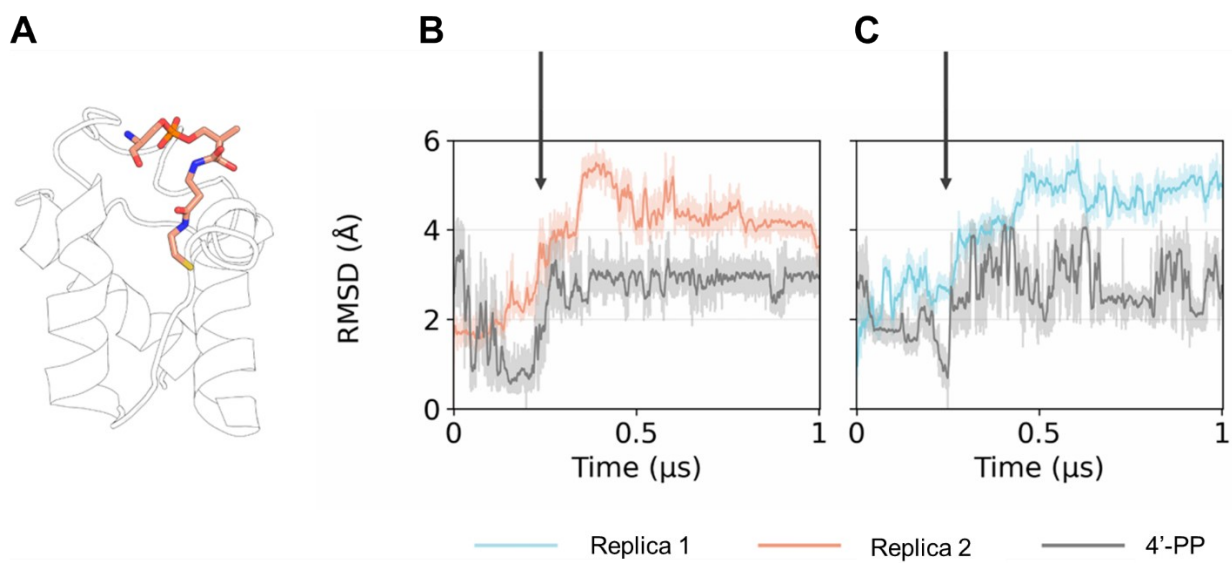

**Fig. S45** Correlation between 4'-PP and protein RMSD in selected *holo*- ACP replicas. Arrows indicate the point of 4'-PP displacement from the ACP binding pocket. (A) A representative frame extracted from MD simulation, showing how the 4'-PP group positions itself inside the binding pocket. (B) *holo-EcAcpP*, Replica 2 (C) *holo-ALGO-059*, Replica 1.

229

230

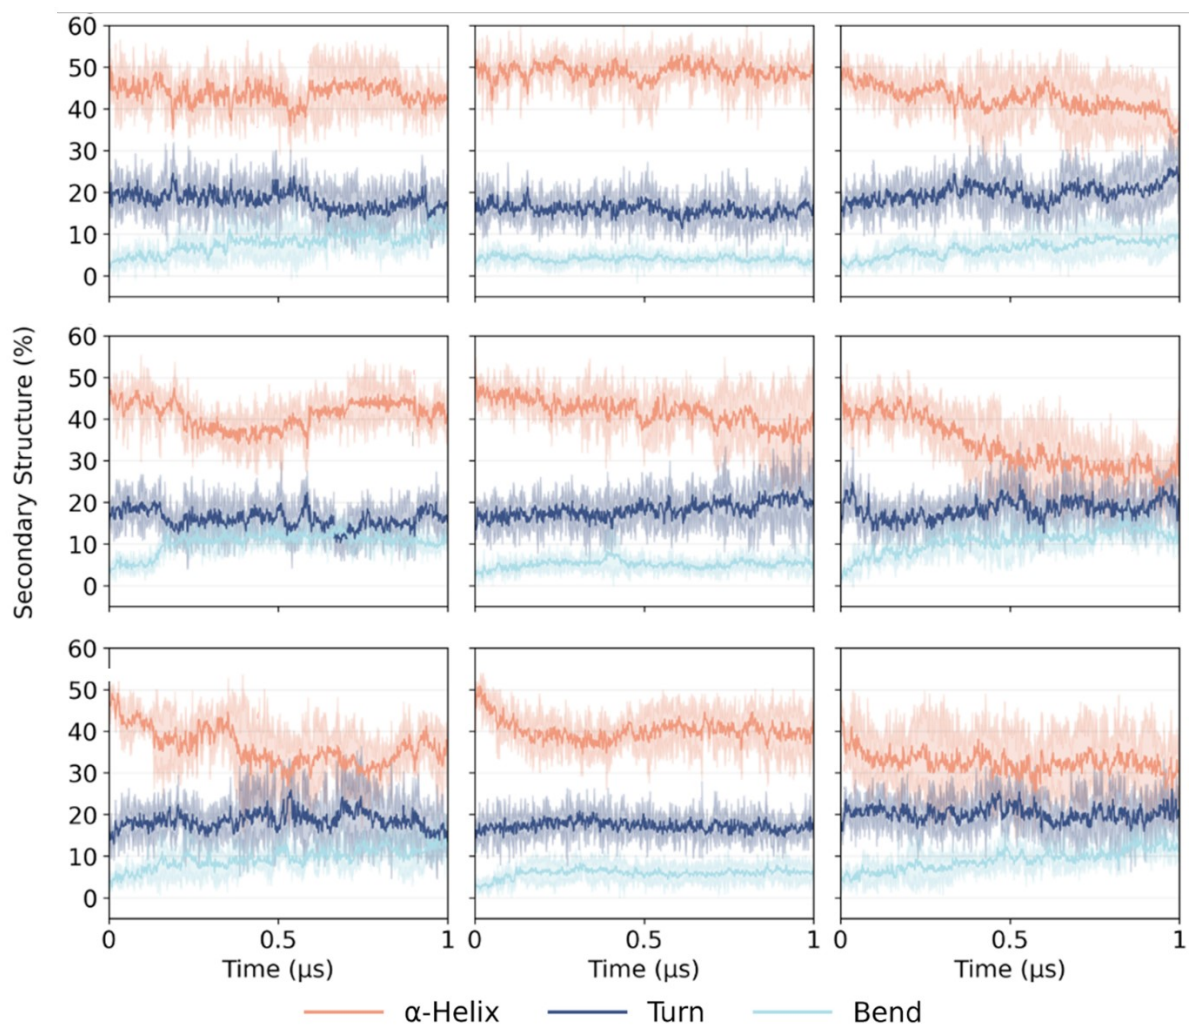

**Fig. S46** Backbone DSSP profiles of MD trajectories. MD trajectories of *EcAcpP*, ALGO-055, and ALGO-059 models were analysed in *apo*- (top), *holo*- (middle) and *C*<sub>12</sub>-acylated (bottom) forms.

231

232

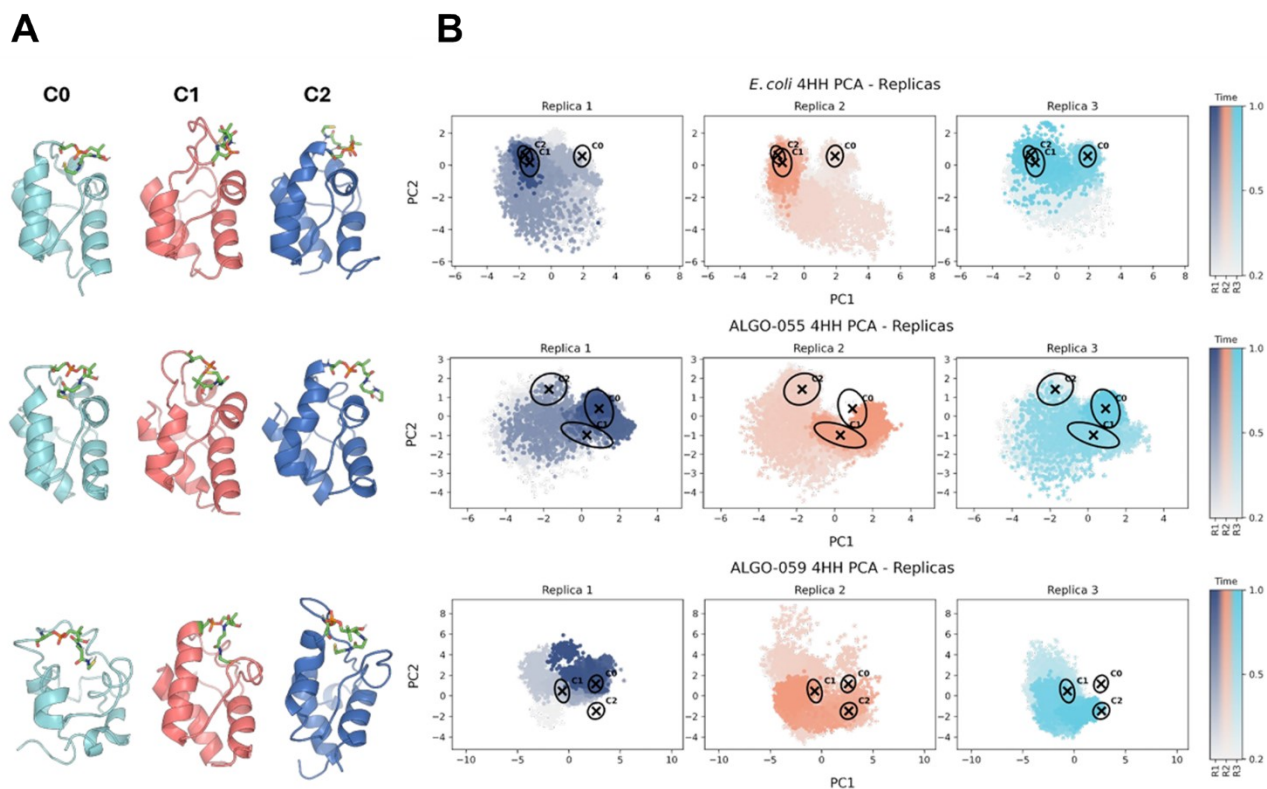

**Fig. S47** Cluster analysis and PCA projections of *holo*-ACP trajectories. (A) Representative structures of the three main centroids (C0, C1, C2), clusters are marked as black circles. The 4HH moiety is represented as sticks in green. (B) PCA projections onto the PC1-PC2 plane for each replicate of the four ACP variants. Trajectories evolution is represented by colormaps. Clusters are marked as black circles.

233

234

235 **Additional CD data (Fig. S48)**

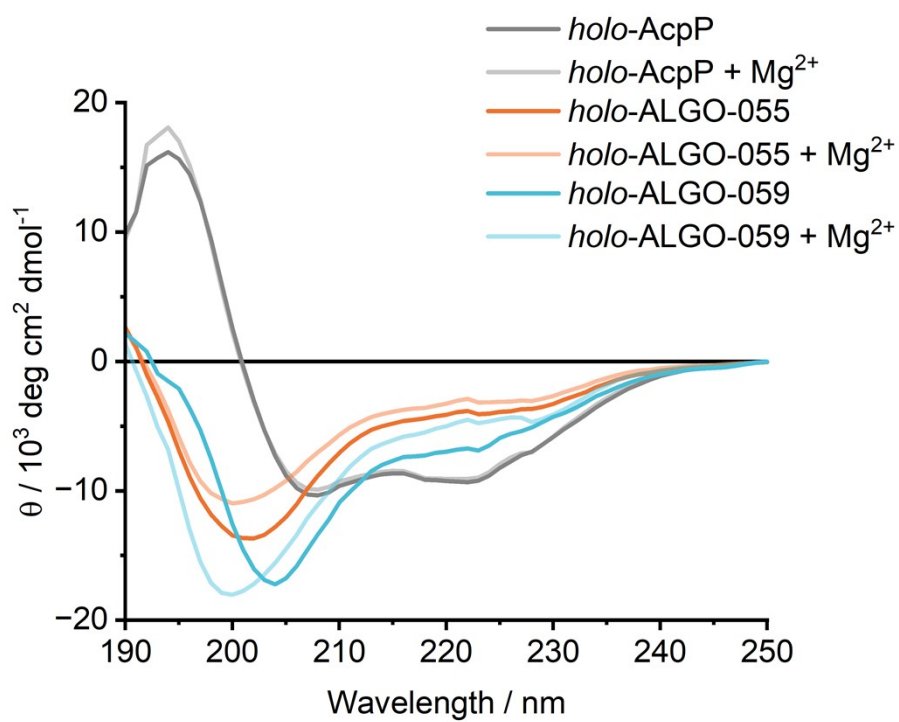

**Fig. S48** CD spectra of *holo*- proteins before and after MgCl<sub>2</sub> supplementation.

236

237

238 **Additional sequence data (Fig. S49)**

239

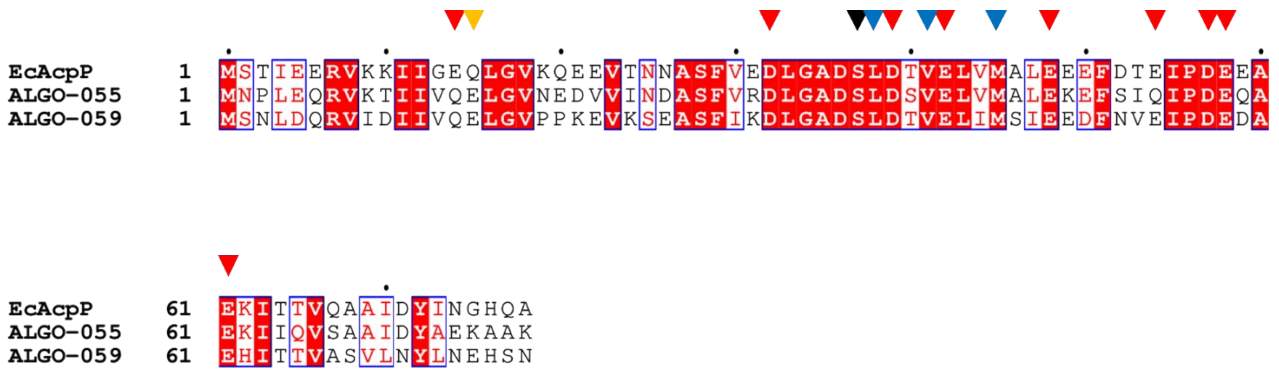

**Fig. S49** MSA of *EcAcpP*, ALGO-055 and ALGO-059, highlighting conserved contact residues. *EcAcpP* residues involved in PPIs with *EcAcpS* and *VhAasS*, based on reported crystallographic and NMR data, are shown as triangles. Black triangle (position 37) highlights the position of the invariant serine. Red triangles show important acidic contact residues. Blue triangles highlight known hydrophobic contact residues that interact with *VhAasS*. Yellow triangle (position 15) highlights Q→E variation in ALGO-055 and ALGO-059 that could still plausibly engage in PPIs.

240

241 **Raw SDS-PAGE Images**

242

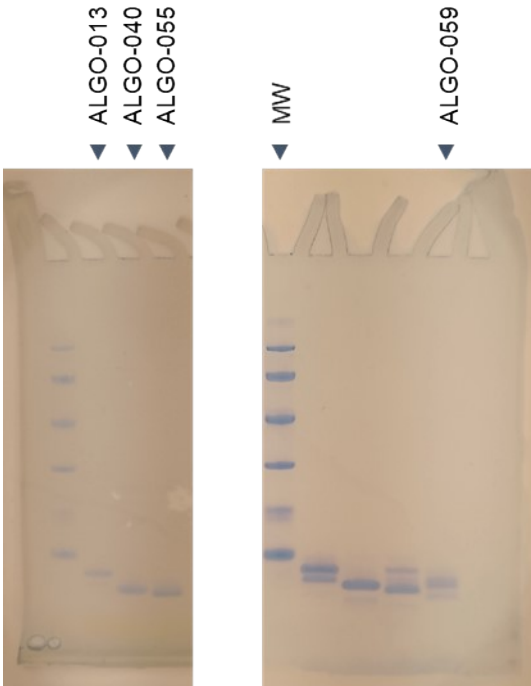

Raw SDS-PAGE gel photographs used for the composite image shown in Fig. 3B. Triangles indicate the lanes cropped.

243

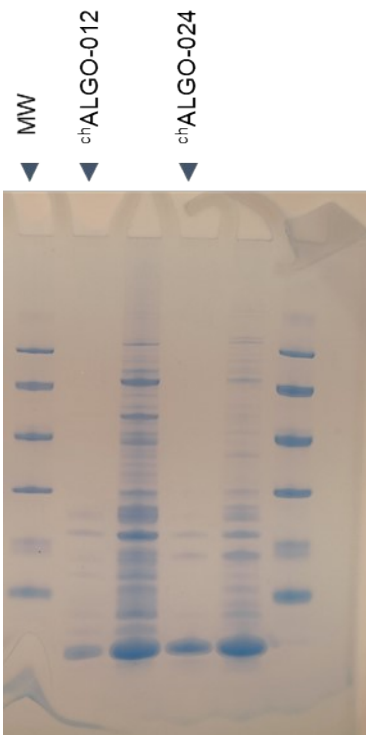

Raw SDS-PAGE gel photograph used for the image shown in Fig. 3G. Triangles indicate the lanes cropped.

244

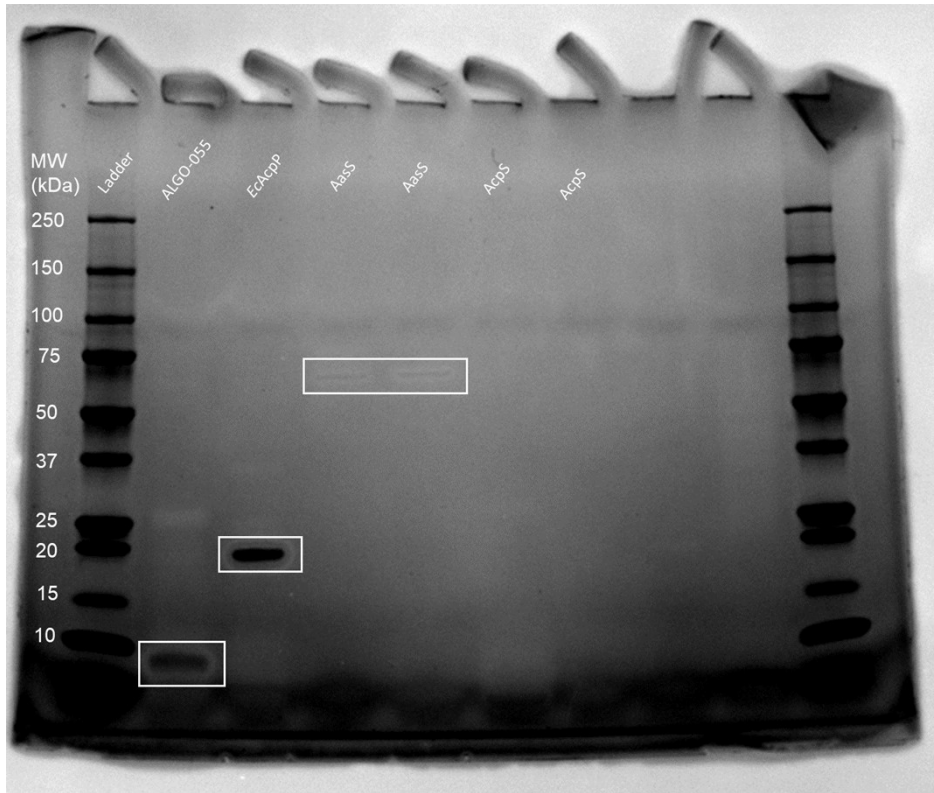

Raw SDS-PAGE gel photograph used for the image shown in Fig. S14A.

245

246

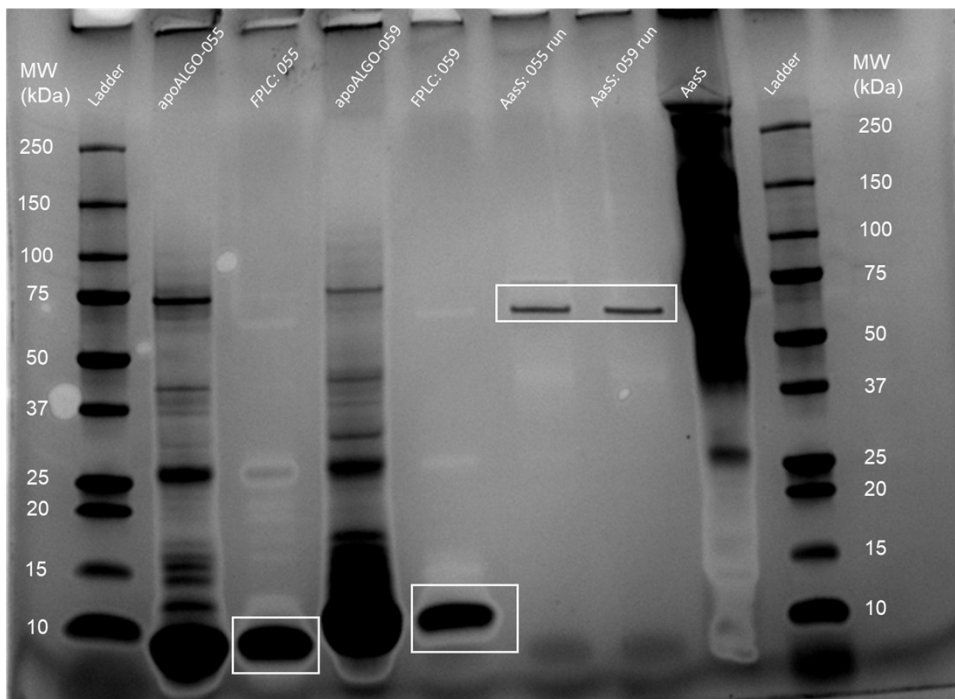

Raw SDS-PAGE gel photograph used for the image shown in Fig. S14B.

247

248

249

250 Plasmid Maps

251

252 ALGO013

253

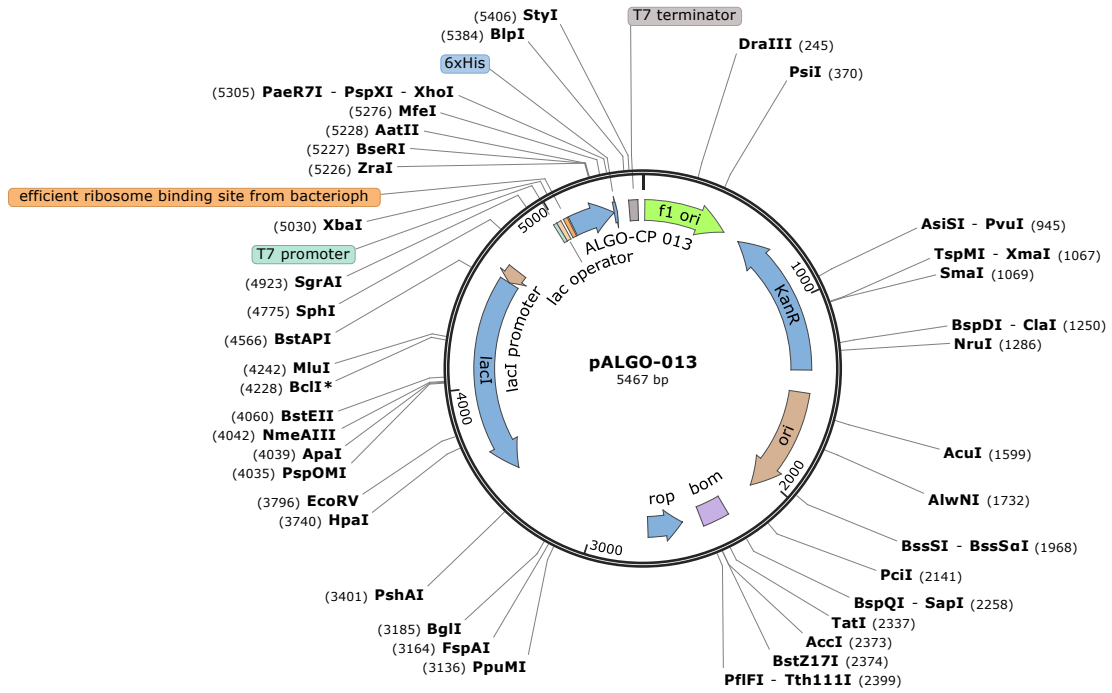

254

255

256 pALGO-023

257

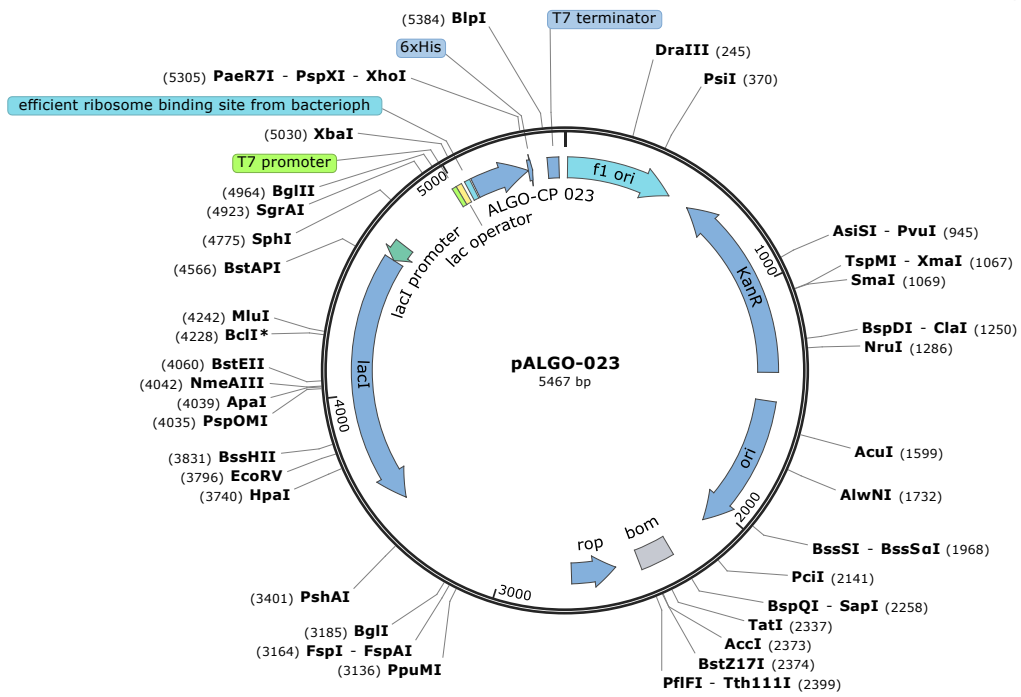

258

259 pALGO-040

260

Created by SnapGene

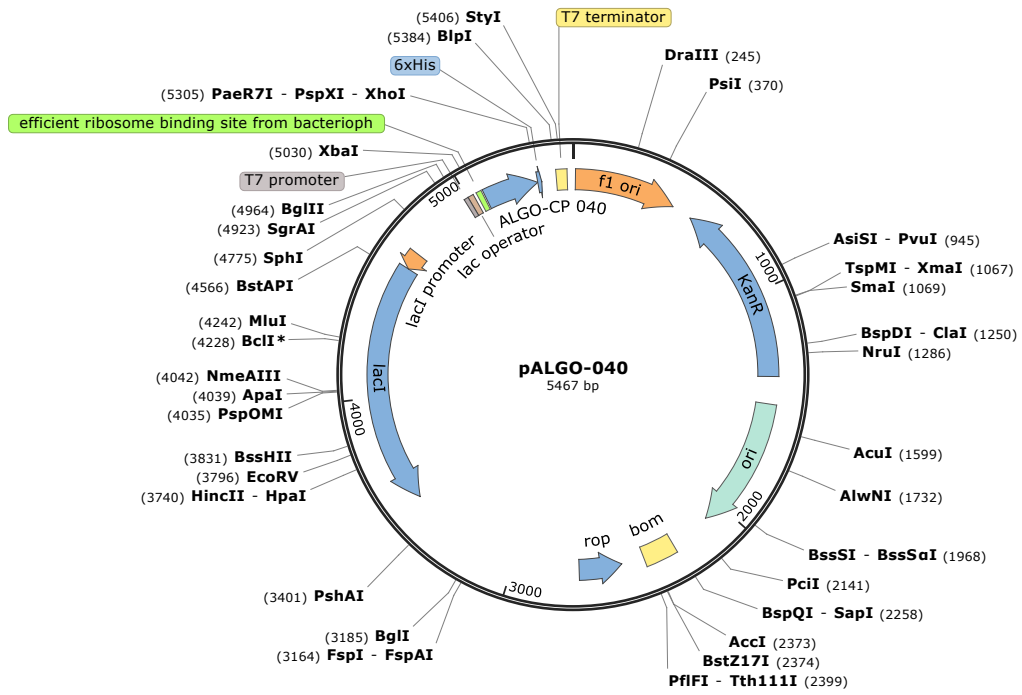

261

262 ppALGO-044

263

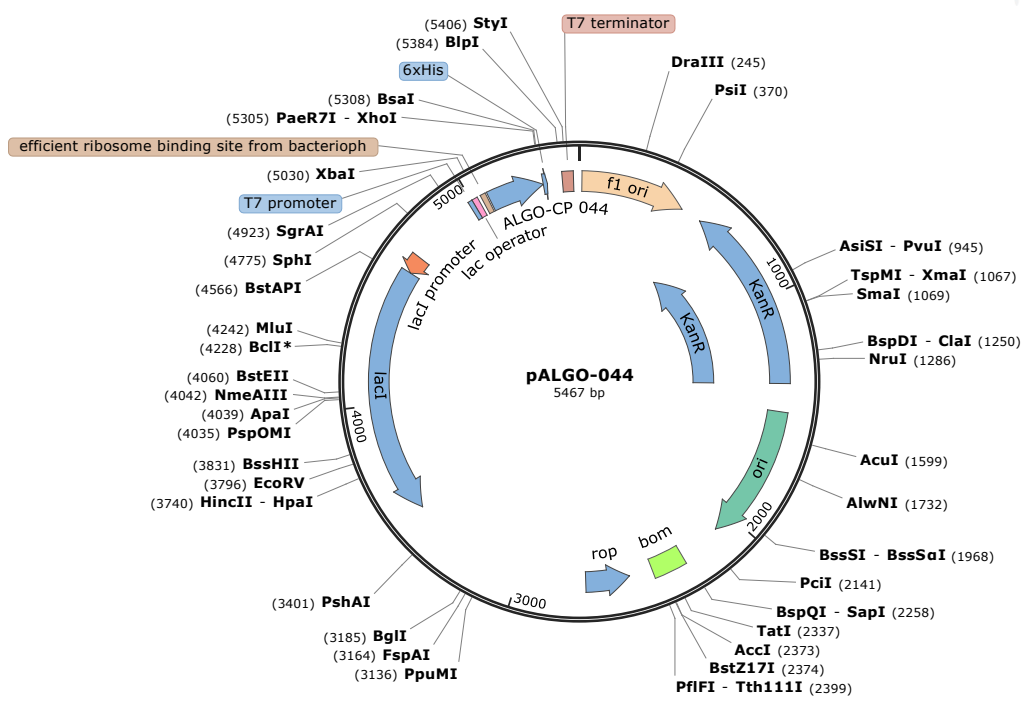

264

Created by SnapGene

265 pALGO-055

266

Created by SnapGene

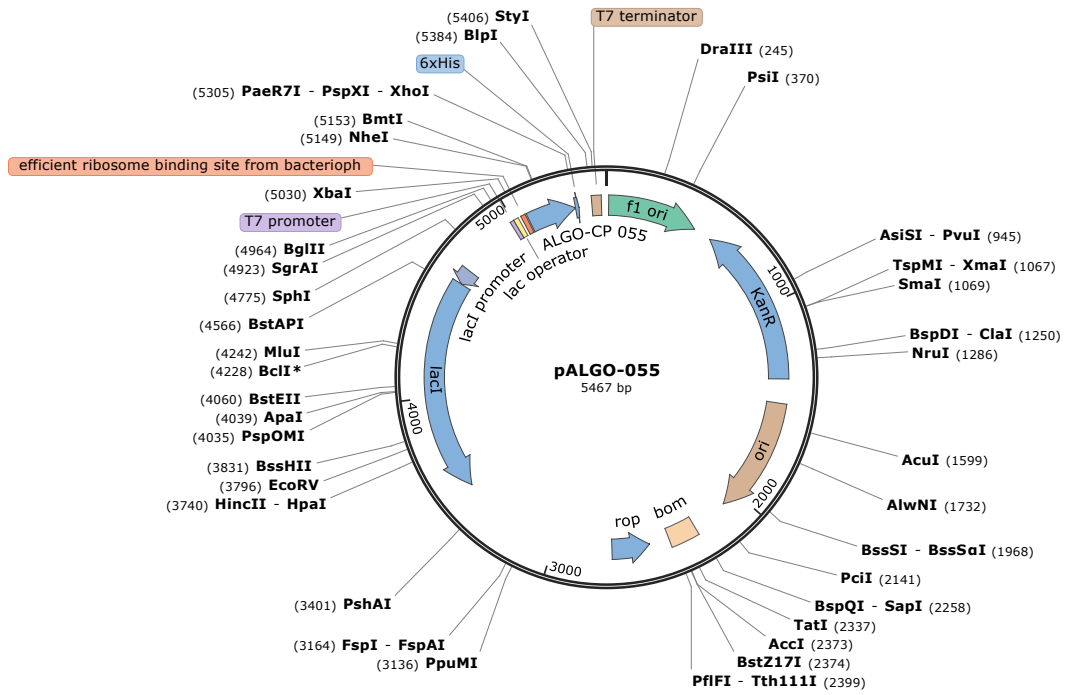

267

268 pALGO-057

269

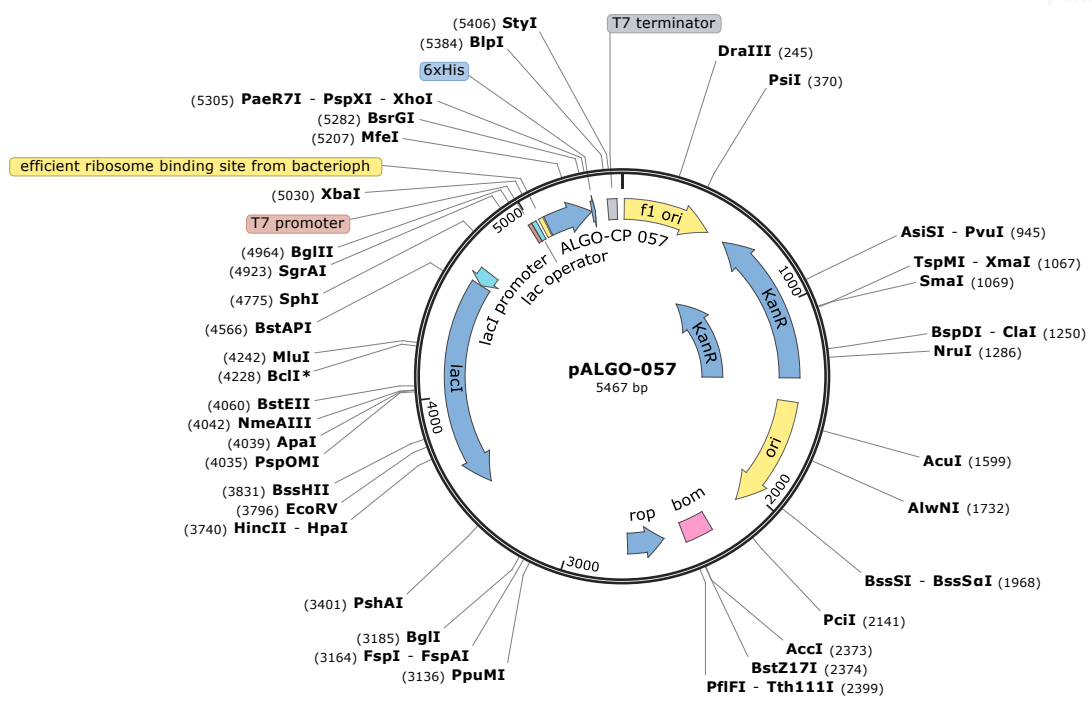

270

271 pALGO-059

272

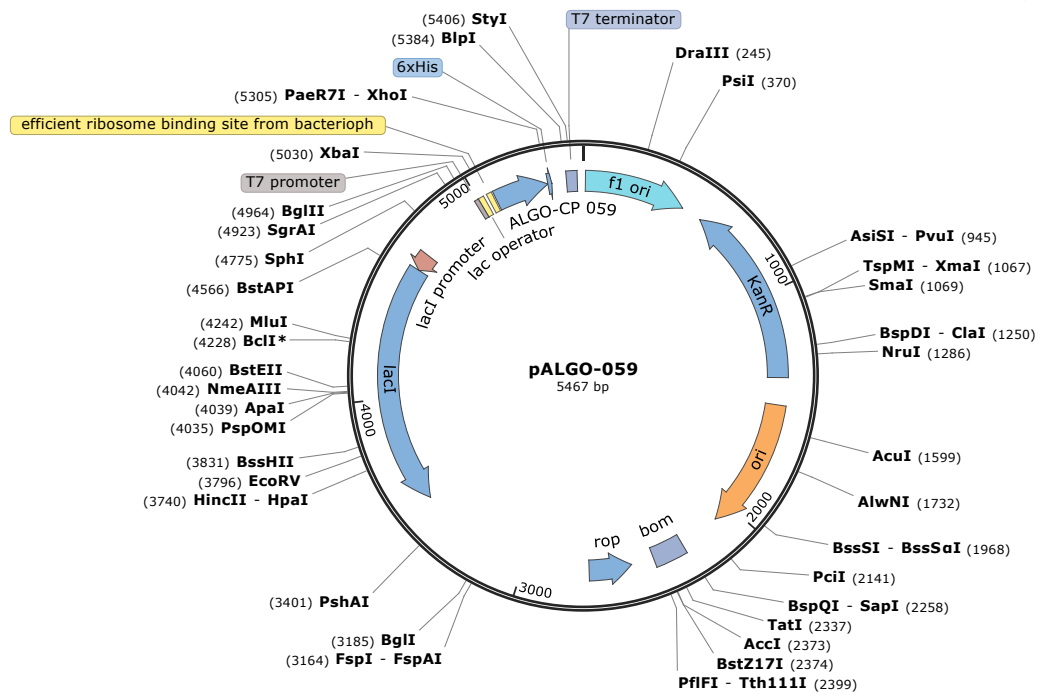

273

274

275

276 pCHALGO-009

277

Created by SnapGene

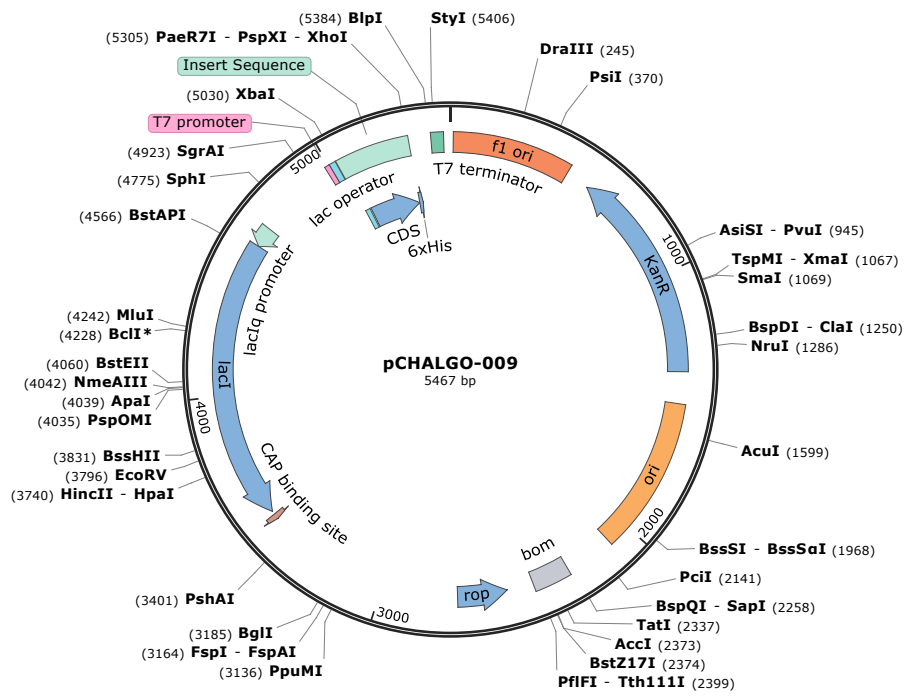

278

279 pCHALGO-012

280

Created by SnapGene

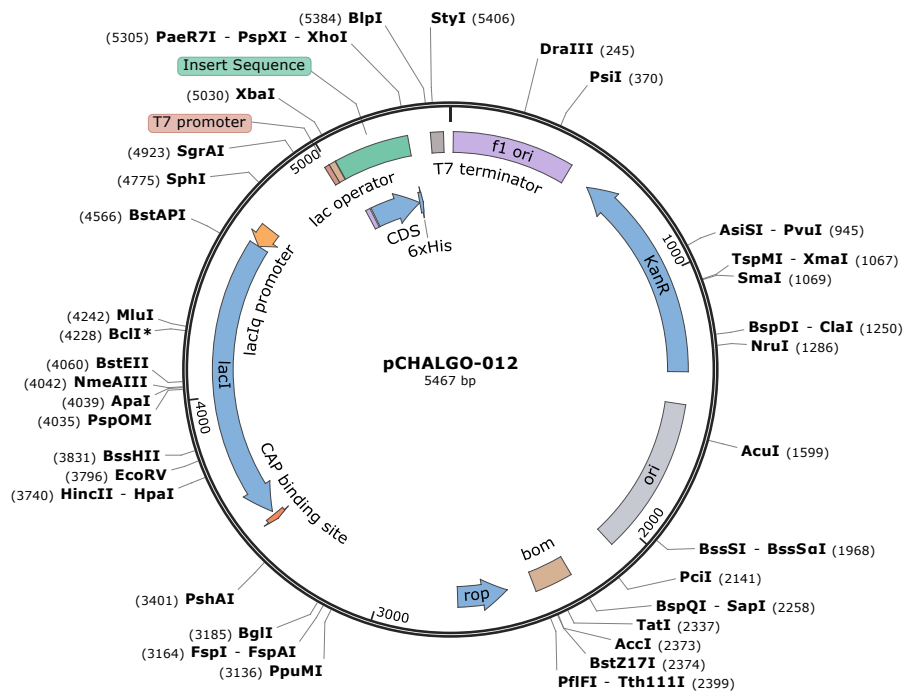

281

282 pCHALGO-024

283

Created by SnapGene

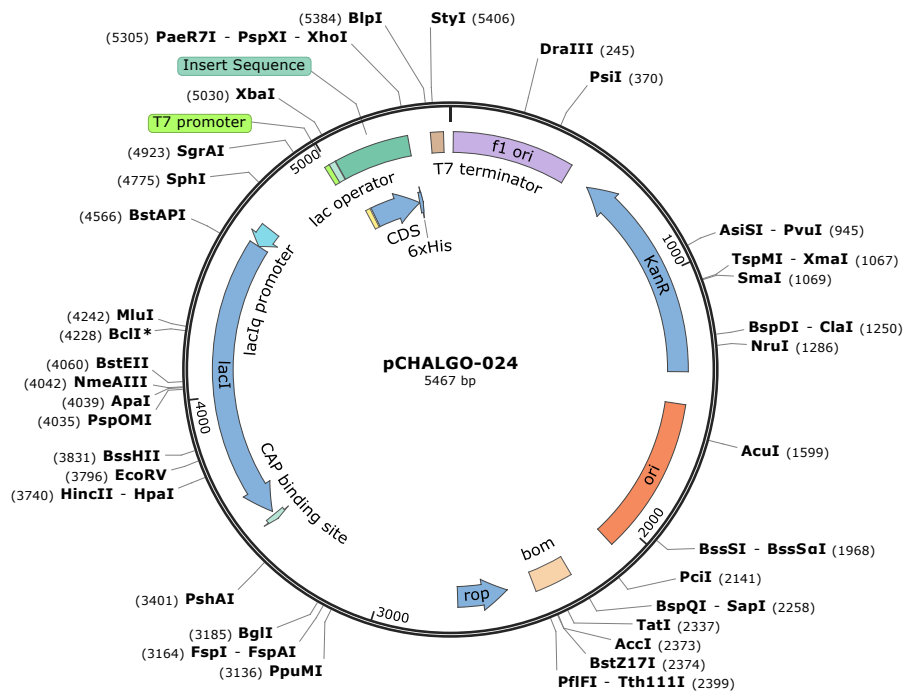

284

285 pCHALGO-044

286

Created by SnapGene

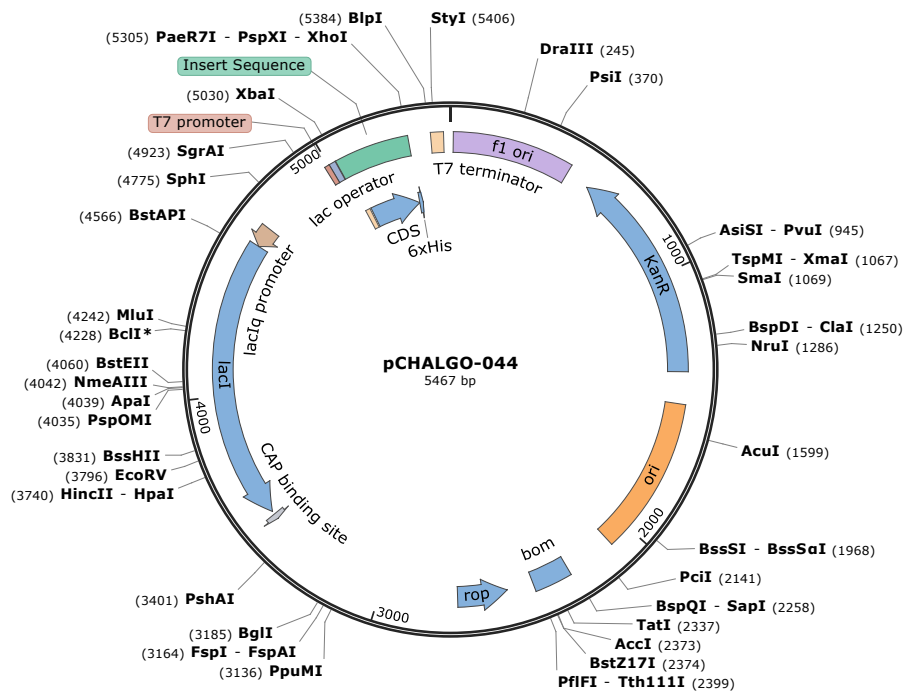

287

288 pCHALGO-097

289

Created by SnapGene

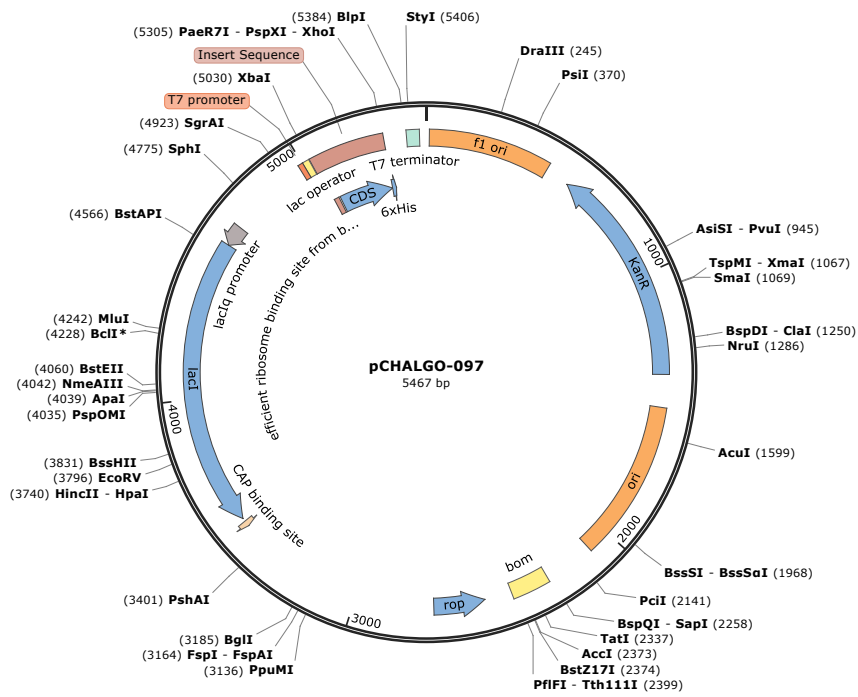

290
